# Supplementary material for: NPF genes excavation and their expression response to vernalization and nitrogen deficiency in allotetraploid rapeseed
Source: Research Square preprint supplement (doi:10.21203/rs.3.rs-236072/v1), 2021-02-25
Supplement: Supplementary file 2 [file fffe104ccdffe7a0049f9d4a.xlsx]

## Sheet: Table S1
Table S1. The primer sequences were obtained from the qPCR
NPF gene	Primer_F	Primer_R
BnaA01NPF1.2	ATTTCGCGTTTGGCCTTATATC	CTCTCGTTCTTGGGATTCTCTT
BnaC03NPF1.3	ATGTCAAGATCAGAATGGGGTT	CTTCTGTAATGCTCGACAGTTG
BnaA05NPF1.4	TTCCGCATTTGCACTTATATCG	CTTTGTTATCCAACTGGTCAGC
BnaC05NPF1.5	CAAGAGTCTGTTCACTGGTTTG	AACTTGGTCAGTTGTGCATAAC
BnaC06NPF1.6	CAGCAATGTTACCACAAGTGAA	CCTGATCCGATCGATATAAGGG
BnaC02NPF1.8	CAAGCTAGAGTCAACAACACAC	CTTTTTCTCTGAAACGACCCAG
BnaC09NPF1.9	ATCTTGTTGTAATCCCGTCAGT	TTCTAACGTACTCCACTATCGC
BnaA10NPF1.10	CGCGAGTTTCAGAATGTGTATT	GGTTTTCGTGTTAGTGTCGAAA
BnaA02NPF2.1	AGACGAACATCAGTTGGGTTAT	GGCAACAACCTTAACAATGTCT
BnaC02NPF2.2	CGATTGCGAGCTATATATGCAC	CTGTTGTCCTTGTTGTTCTCAG
BnaC07NPF2.3	AAGAACAACTGGAGACTATGCA	GTCCGAACGTTTTATCCATCTG
BnaA06NPF2.4	CTTTGATGGAGTTTTTGACGGT	CAACCGACGAGCTTAAAAAGAA
BnaC08NPF2.5	TTTAGGTTTCTTGACAAAGCGG	ATAGCTTCCATATATCTGCCGG
BnaC05NPF2.6	ACAAAACTCCATTGCGATCTTC	CGGTTCGGTTTTAAGGTTACAG
BnaA06NPF2.7	TTTCCTCTGCGACTCTTACTTC	CTCCGGCAAGAAACATTATCTG
BnaA01NPF2.8	ATTTAACGTCGACGGTTGATTC	GTTGCAGCTGTGTATTTCTTCA
BnaC01NPF2.9	GCAAATGACTTATCCGGTCTTC	CAACGAACCCAGAAATCAACAT
BnaA06NPF2.10	TTTGCTGGTCACAAACTGTATG	GTTGTAAAGATCGATCCAAGGC
BnaA06NPF2.11	CTTCTTTGCGGTGTTGAGTTTA	CCATCCCTAGAGTCTGTTTTGT
BnaC03NPF2.12	CCATGGAAAGAAAGCCTTTTGA	TTTCCATCCTCTATACACGAGC
BnaC07NPF2.13	TCGTTCTCATCGTTTTGCATAC	TTTCTTACGAGCCGCTAAAATG
BnaA07NPF2.14	TCGTTCATCCTTGGAAATGAGA	GCTGAGACCTAACCACAAATTG
BnaA07NPF2.15	TTTTCTCCCTTCTCGGACTAAC	GATGCTACAAGGTCGTATTCCA
BnaC02NPF2.16	ATAGAAGGCGATCTAACATCCG	CAGGAACGATTCGAATCAAACA
BnaC06NPF2.17	GAACAAGCTTCAGTTCGGAATT	ACGGTCTGTGTAATAAGCAGAA
BnaA07NPF2.18	GAGAATCGCATCTCACAATTCC	GGCTACACTCAGAATGTTCTCT
BnaA07NPF2.19	TCACGGTTTATCAAGCTCTGAA	ATACGTTGGAGGAGTGTGATAC
BnaC06NPF2.20	TTTCGCTGGAATGAAGCTTTAC	GGTGTAACTTGTGTAAAACGCT
BnaA07NPF2.21	TGGATTGACGTCGAATTTCATG	CGGAGATGGAACCAAAAACAAT
BnaC06NPF2.22	GCTCGTGCAGTATTCCTTTTAG	GCCCAGCTAATGTTGTTTTGTA
BnaA02NPF2.23	GCTCAGATTTCGAACATTGTCA	GATGACGAGGATGTTTCCAAAG
BnaC02NPF2.24	CGGAATTCAACATCAAGAGCAT	GCTAAAATGGCTGCTACAAGAG
BnaC01NPF2.25	CGTTCATGATGGCTACATTGTT	GAGGCATCCATTGACAATGTTT
BnaNPF2.26	CGACATCATTGACCTCACTAGT	ACATTATCAACTCTTCCGTGGT
BnaC01NPF2.27	AGTGAACGATCGACTTCTCTAC	GCAACGGATGATGATTCAAGAA
BnaNPF2.29	TCCTCGAGTCATCTTCTATTGC	AAACGTTGTCAACTCTTCCATG
BnaA07NPF3.1	CATAAGTTGTGTCGTTGTCTGG	TTTCGTCACGTAAGATTGATGC
BnaC06NPF3.2	GATTCGTGATCTCGATAATCGC	AAATGCCCGATCGACATAAAAG
BnaA07NPF3.5	ATTGCAAGAAAGTTCACTGGTC	GTTTTCGTTCGATCTCAACGAA
BnaC06NPF3.6	GGAGTTTTTCTATGACCAAGCG	AGTCACAAGTAAAGTACTCGCA
BnaA03NPF4.1	AGCTTGATAGTCGAAACCAGAA	ACGTTCACAATTCTGGTCAAAG
BnaA03NPF4.2	TATAGAGAATCTCCCGCGAGTA	CCGTACTGAGGAAGAAACCTAA
BnaC03NPF4.3	CTCTCCTACCAATTTTTGCGAG	CTTTCGTTGTTGCTTGATGAGA
BnaC04NPF4.4	CTGGTCGTTATTCCTCTACTCC	CATATTTCCTCGTCGTTTCCAC
BnaA07NPF4.5	CGAGGGCATTTCTCATAACAAG	CCAAAAATGTTCTTGTTTCCGC
BnaC07NPF4.6	TGCTCGAGAAAATCTTCGAGTA	GAATCCCTCTTTGCTCCTTCTA
BnaA07NPF4.7	TCGAGTAATGCTGTTGAGAACT	CAATCTTGACGTCTTCCACTTG
BnaC06NPF4.8	CCATTCGCTAGAAAAACAACCA	GTCGCTAGAGATCTCATAGACG
BnaA07NPF4.9	TTCTACTATCGCCATCTTCGTC	ACTGTTGGTTAGTTGTGTCTGA
BnaA06NPF4.10	GGATCTCTTCACTTTAGCAGGT	AAACCCGTGACGAAATTAACAG
BnaC03NPF4.11	GTCTTAACCGCTGCTTTATACG	CCCTTGGCTATATTGTCTTTGC
BnaA01NPF4.12	GTGGCTGCCATACTAAAAACAA	TAAAGTGGAGGAATCTACGACG
BnaA09NPF4.13	ACACTCGTCTCTCAAATTCCTT	CGCAAAAGGAACGAATAGAGAG
BnaC09NPF4.14	AAGTTCACGGGACAAAAATCAG	AATCAATCCAACGGCAGTAAAC
BnaA09NPF4.15	GGACTACACATGTACGAGGAAT	CGTATGTGATCAAGTTGTTCCC
BnaC06NPF4.16	AACAGTCTTCACAGAGTATGCA	GACGTAACTTTATTCACGGTCG
BnaA05NPF5.1	AGAAGAAACAGTCCCTGAAGAG	CAAGAGGTTGAACATGCTCAAA
BnaC04NPF5.2	TGAGGCTCAAAGTGGTTAGAAT	GGGACCGTTTCTTCTAGGTAAA
BnaC04NPF5.3	CTTGTCTCAGTGCCAATGTATG	GGATTACAAACCCTACCCCTAG
BnaA04NPF5.4	CACTATACTCCAAAGGCTAGGG	AATTCCTTTATTACGCGCATCC
BnaA04NPF5.4	CACTATACTCCAAAGGCTAGGG	AATTCCTTTATTACGCGCATCC
BnaC04NPF5.6	GCATTCAAAAACCGAAAGCTTC	AATATGGGGGTGTGATGAACAT
BnaC03NPF5.7	ACTCCCATATTCAGGTTCTTGG	GTTTGACGAAGAGAGTGTTCAC
BnaA03NPF5.8	ATGTTTACACACAAGATGGCAC	ATCGTGTCTTCGTGAAGTTTTG
BnaC09NPF5.9	CTGAGATAACGAAAAAGCGAGG	CTTCATTTGCACCTCTTTCACA
BnaA09NPF5.10	GATAACTCGAAAATTCACCGGG	CCATAAGGAGGATGAGGAAGAC
BnaA02NPF5.11	ATAGGAGCAGATCAGTTCGATG	ACATAAACAAGAACGGTTGTGG
BnaC02NPF5.12	GAAAGCTTGTTCCTTCGTCATT	TTGGTGCAATTTGGTAGTCATG
BnaA02NPF5.13	GGCTTCATTTCGGAAAGCTAAA	CGACTTCTGTGGTTGTACAAAG
BnaC02NPF5.14	CTCTCTAGATAGGCATCGTGTC	TGGTAAATAGTTGGACGACAGT
BnaA02NPF5.15	CTTTGTACAACCACAGAAGTCG	GATGCTGAAGTTTCCGATGATC
BnaA09NPF5.16	CTCGAAAATTCACCGGTAATCC	CTATGCCCATTAACACGAACTG
BnaC09NPF5.17	TTCGAAGATCCATTAGAGGTCG	CTCGATATCCCGTAATATGCCA
BnaA09NPF5.18	GATAACTCGAAAATTCACCGGG	CCATAAGGAGGATGAGGAAGAC
BnaC09NPF5.19	TCACAGTCTCAATTCTCGTCTC	GATCATACCAACTCCCATACGT
BnaA09NPF5.20	CTAGAAAATGGCGAGTAAGCAC	TTGGTTTTGGCAAGAAGATGAG
BnaC08NPF5.21	ATATTGAGGCTCGTACCGATTT	GATTCCAGAATGGTGATTCGTG
BnaC03NPF5.22	GAACCAATGAGTGTGATATGGC	AGTACTCTTGAAGTCCAACGAG
BnaA03NPF5.23	GAAGCTAAGCTGATCATCAACG	GCAAGGGAACGAGGATTTTATC
BnaA05NPF5.24	AACCATTCTATCGTTACCGGAA	GAAACTTCGTGAAGCAGAGAAG
BnaC04NPF5.25	CAAAAGAAAGCTTCCTGATCCC	GAAATTTGACATGCGTTGTGTG
BnaA04NPF5.26	GCAACGGTAACAAAAGTAGAGG	CAAAATAGGCACGAGGAGTTTC
BnaC04NPF5.27	CAAGGCACAACATTCTTCATCA	CAAAATAGGCACGAGGAGTTTC
BnaA07NPF5.28	CGCAACGGTAACAAAAGTAGAA	TTCTTGTGACGCGTCTTAAAAG
BnaC06NPF5.29	ATTGGTACACCGTTCTATCGTT	GAGAAGTATCACTGGGATGAGG
BnaC08NPF5.30	TGAGGAAATCTCTGGAAAGACC	GGCTACAAATACAAAGACGCAT
BnaA09NPF5.31	CCGCTGCAAATATATGCTTCTT	CGTATACGGTATACTTCGACGT
BnaA02NPF5.32	CCAACAACCAGCAACATTTTTC	GAGTGATTGTGCTTTGTAACGT
BnaC02NPF5.33	ATCGAACCGTAAGTCTCAGTTT	ATCAACAATAACATGGAAGCGG
BnaC09NPF5.34	TTGTGCCCTTCTCATAGTGATT	TGAAAAATCTGTCCCCGTAAGA
BnaC09NPF5.35	TTGTGCCCTTCTCATAGTGATT	TGAAAAATCTGTCCCCGTAAGA
BnaA10NPF5.36	GCGTTAGTCGAGAGAAAAAGAC	AGGTAAGAGCCAGAATATGCTC
BnaC05NPF5.37	CCCTGTCACCAAAAGAATCAAG	GTCTTTTCCTTTCGACTAGTGC
BnaC05NPF5.38	GCAATGTTCCTGTTGATCTTGT	GTCATCATCGCATTCACAAAGA
BnaC06NPF5.39	CGTCCCAATCACAAGATCATTC	ACATAGCAATAACGGAGAGGAG
BnaA02NPF5.40	CAAGGCTCATCATCTTCGTAGA	CTGTCAGGTACGTTATGAGGTT
BnaC02NPF5.41	CAGCACCTCTAAAGTAAAAGCC	CTGTCAGGTACGTTATGAGGTT
BnaC06NPF5.42	CTTGCTTTCATCCCAATCTACG	GACTTGGTCGTAGAAGAACTCA
BnaC06NPF5.43	GCTTAAGCTTGTTCCCATATGG	GATCTTGCGATAGGGACAAGTA
BnaC06NPF5.44	GAAAGACAGCCGTAAAATCCTC	CTGAAGCTGTTGACTCTCCTAA
BnaC02NPF5.45	CGCTGATGATAAACTCGGAAAC	TATTCCGTAGTAAGCGAATCCC
BnaA09NPF5.46	GGTGGGTCTTCAAGAGTTTTTC	CCTTGTTCAAGTTATTCGCGAA
BnaC05NPF5.47	ATAATGTATCTGACGGGACCAC	AGTAAACCAAGTCCCAATACGT
BnaA02NPF5.48	GAAAAATCGACGAGAGACTTCG	CGCTTCTTCAACTTCAACTGAA
BnaC02NPF5.49	GCAAAGATCAAGAAACACTCGT	GAAAGCTCTAAGACATGCCTTG
BnaC06NPF5.50	CTTCACAAAGCAAGGATCAACA	CGGTCGTATATTGGGATGAAGA
BnaA07NPF5.51	CTTTAACTGGTCCTATTTCGCG	GAAAGACATGGAATCCCAAACC
BnaC06NPF5.52	GATTCGCTTATTATGGGATCGC	GACAAAGTCAAAAGTCCCATCC
BnaC02NPF5.53	TTATAGACCAACCCGAGACAAC	AAGAACTCTTGCATTCCCACTA
BnaA08NPF5.54	ACTGGTTCAACACTAACCTGAA	ACTTGCAAGTTAGAACCACAAC
BnaC08NPF5.55	ATTGGGACTTTCGAGCTTCTTA	CTACCCGACGATACACATACAA
BnaC05NPF5.56	AGACGCATATCTTGGTCGTTAT	CCCAGAAAAACGATTTAACGGT
BnaA09NPF5.57	CGCTATCACACCATTGTTGTAG	CCCAGAAAAACGATTTAACGGT
BnaA07NPF5.58	GTGGTTCATGACTTTATCTGCC	GTGCCCAGCTTATATTGTCTTG
BnaC07NPF5.59	GTTGTTGTTACTCTGGTGTGTG	CGCCGTCTTTTACTCTAGTGTA
BnaA08NPF5.60	CAATGCTCCAAAGAATAGGAGC	CAAACACTTCGATCATACCGAC
BnaC03NPF5.61	CCCTAACTCTTATGGGATCGTC	ATGGCCACAAAATAAAGAGAGC
BnaC03NPF5.62	TCGGTCTTGCTTTTTCTTTGAG	TGTGGCCCAATCAATAACAATG
BnaA08NPF5.63	TCGGTCTTGCTTTTTCTTTGAG	CAGGTTCTGCGACATCTAATTG
BnaC04NPF6.1	GCCGTTTCAAAACTATCGCTAT	AATGTCATTTGGAAAGCGGTAG
BnaA07NPF6.2	GTGCCTTCACTAGTTACGTTTG	CTAAAGTTCATCACTGTAGCGC
BnaC07NPF6.3	AAAACAGCGATCACCGAAATAG	AAGGTGACAAAGGTTACAAACG
BnaC08NPF6.4	GGAACTTCGTTCATGCTATGTC	GATAGCGGCGAATATAGCAATG
BnaA09NPF6.5	TGGGTCATTGATGAGATGATGA	GACTTTTTCCCATATAGATCGATCC
BnaA08NPF6.6	AATCAATATCCCCATAACCCCC	TAGTCCCTGTCAAATACGTCAC
BnaC08NPF6.7	TTAGGTATCGGCGTTAATCTGG	CTGCGAATATGGCAATCGTTAG
BnaA06NPF6.8	ACCGAAAGAACAGTCACAAATG	CATCGTCTTGCATGTAGACAAG
BnaC05NPF6.9	TCTTCAACCGCTTCTTCTTTTG	CAACTTCTTGAAACGGTAGCAA
BnaC05NPF6.10	CATACCATGTTCATGTGTCGTC	GCATATTCTCTCCGAGAGTTCA
BnaA05NPF6.11	AAGCTGTACCGTTTCAAGAAAC	GCGGCTTTGTCTAAACACTTTA
BnaC05NPF6.10	CATACCATGTTCATGTGTCGTC	GCATATTCTCTCCGAGAGTTCA
BnaA05NPF6.11	AAGCTGTACCGTTTCAAGAAAC	GCGGCTTTGTCTAAACACTTTA
BnaA02NPF6.14	TTTTACAAGCAGCGAGTTTGTC	GTTACTGTGCATAGCTTCCATG
BnaC02NPF6.15	ACCGCTTCTTCAACTTCTTCTA	GAAAAGCTGCAACTAGTACCTG
BnaA10NPF7.1	TTGCTAGGAAACCAAGGACTAG	CACCAAGGACGAAGATGATTTG
BnaC09NPF7.2	CTATGGCAAATTCCACAGTACG	ACGTAGTTACCTAACGCCATAG
BnaC07NPF7.3	TTCAAACTCTAGCTCGTTGAGT	CCAACGTACATGAACACTTCTG
BnaA03NPF7.4	CTACTGGTGCGTTACTACTTGA	AGAGTCATCTGCATCAAACTGA
BnaC01NPF7.5	TTGTGTAACACTAGGCCTTAGG	GAGCTAAGCAAATCTCGAATGG
BnaA01NPF7.6	AGTTACTTTGAGGATCAAGGGG	TCAAGAAAAGCACTAAACCTGC
BnaC05NPF7.7	CTAGAAGCGAAACATGAGATGC	TTACATCACCGGAAAACCAAAC
BnaA09NPF7.8	AGATTCTATTTCCTCCTGGCTG	TAGACTTTGGAATCCTTGGGTC
BnaC05NPF7.9	CTAGAAGCGAAACATGAGATGC	TTACATCACCGGAAAACCAAAC
BnaA05NPF7.10	TGGTGAAGATCTCTACAGAGGA	GAAAACCGAAAACCAAACACAC
BnaA04NPF8.1	GCGTTGTATAGGGGATTACAGA	CCGTCTTTGATGCTATCTGAGT
BnaC04NPF8.2	ACACATGGGGAAAAATTTCGAG	CATACGTTGAAGCTGAGTGAAG
BnaA09NPF8.3	TTCCACTCTAAGCATGTACTCG	CGACTGTTCCATCTTCCGTATA
BnaC08NPF8.4	GGAAGCTAGAGCATACAGACAA	GACAAAGATGGAATTTGGCCTT
BnaA10NPF8.5	ATGTTAGATTCTCGATCTGCGT	CTCTCTCTCTCAGGATTTGCTC
BnaC09NPF8.6	ACACAGCTTCAACGTATAGGAA	GTGAGTTCGCACGTATCTTAAC
BnaC07NPF8.7	CTTCTTTGGCACACCTCTTTAC	ATACTGGCAATCATCGGTATGT
BnaA06NPF8.8	CTAAAGCCAGCTGAATGCATAG	TAAAGCCCACCAAAGAACATTG
BnaC09NPF8.9	CTCAGTACGCAATGTTCTTCAG	TGAACACTGTCGGTATACCAAA
BnaA09NPF8.10	ACTCTTAAAGTCCCTGAAGACG	GCAGCTTTGTCTAGATACTTGC
BnaA09NPF8.11	CAGATTTTCATACTCGGTGCAG	GTAACTCCCAAACGCATAAGTC
BnaC08NPF8.12	CAGATTTTCATACTCGGTGCAG	GTAACTCCCAAACGCATTAGTC
BnaC05NPF8.13	TTCTGATACGAATGCTCCCAAT	GATCTTGAAAGAGCCGATGTTG
BnaA06NPF8.15	TCTCACAAAAACCGACAATGTG	GGCTGCTATACCGAAGATAGAA
BnaC02NPF8.16	ACCGTTCCAATCTACGATAGAC	TCAAGTAGTTTCCAAGCGTAGT
BnaA09NPF8.17	CATGAGACAAATGTATCTGCGG	ATTCCGGTGAAATAAATGGCAG
BnaC09NPF8.18	CCATTCATTCTCGGCAATGAAT	CCGCAGAAACATTAGTCTCATG
BnaC09NPF8.19	AGCAGAATGTATTGGCCCTTAT	CTCGTTCGATAGGGTCAGTATC
BnaACTIN	CCCTGGAATTGCTGACCGTA	TGGAAAGTGCTGAGGGATGC

## Sheet: Table S2
Table S2. Ka, Ks and Ka/Ks of orthologous pairs on BnaNPF and AtNPF genes
NPF subfamily	NPF	Ka	Ks	Ka/Ks	P-Value(Fisher)	Substitutions	Divergence-Time
NPF1	BnaC01NPF1.1	0.0648955	0.331377	0.195836	1.4507e-28	208	0.139495
	BnaA01NPF1.2	0.0635026	0.328442	0.193345	7.86326e-28	204	0.137081
	BnaC03NPF1.3	0.0812756	0.332399	0.244512	4.4305e-19	187	0.153012
	BnaA05NPF1.4	0.0591019	0.330946	0.178585	9.78101e-26	168	0.138811
	BnaC05NPF1.5	0.0546333	0.346658	0.1576	2.94982e-29	168	0.140232
	BnaC06NPF1.6	0.038709	0.421314	0.0918769	5.57257e-49	184	0.139957
	BnaA06NPF1.7	0.0389942	0.402119	0.0969718	1.61634e-42	164	0.137253
	BnaC02NPF1.8	0.157119	0.358809	0.43789	1.13734e-08	238	0.216719
	BnaC09NPF1.9	0.133217	0.367876	0.362126	1.61669e-12	242	0.20252
	BnaA10NPF1.10	0.129199	0.41961	0.307903	4.96748e-17	249	0.214142
average value				0.226665
NPF2	BnaA02NPF2.1	0.0918644	0.407065	0.225675	8.53932e-27	241	0.17557
	BnaC02NPF2.2	0.0928862	0.420671	0.220805	3.9897e-28	246	0.179974
	BnaC07NPF2.3	0.0907648	0.464005	0.195612	6.48357e-33	256	0.193939
	BnaA06NPF2.4	0.0908773	0.463673	0.195994	8.46901e-33	256	0.194238
	BnaC08NPF2.5	0.0482788	0.364111	0.132594	1.66394e-39	196	0.136953
	BnaC05NPF2.6	0.0606835	0.401968	0.150966	2.40949e-36	210	0.150529
	BnaA06NPF2.7	0.0576807	0.413763	0.139405	1.89043e-39	208	0.150385
	BnaA01NPF2.8	0.197437	0.10917	1.80853	0.000341222	267	0.177255
	BnaC01NPF2.9	5.39344	1.83086	2.94585	3.81124e-09	1338	4.39468
	BnaA06NPF2.10	0.205158	0.0945595	2.16962	3.42281e-06	279	0.179145
	BnaA06NPF2.11	0.0935685	0.470277	0.198965	1.92033e-35	283	0.193993
	BnaC03NPF2.12	0.197679	0.0860541	2.29715	1.80319e-06	255	0.170321
	BnaC07NPF2.13	0.134197	0.59014	0.227399	1.07228e-30	328	0.25856
	BnaA07NPF2.14	0.192765	0.708327	0.272141	3.05418e-15	229	0.334126
	BnaA07NPF2.15	0.132027	0.579915	0.227666	1.62918e-30	325	0.255932
	BnaC02NPF2.16	0.0633646	0.434798	0.145733	4.31977e-38	210	0.16174
	BnaC06NPF2.17	0.0796049	0.415373	0.191647	3.13547e-34	254	0.168405
	BnaA07NPF2.18	0.0798013	0.452291	0.176438	1.25589e-38	264	0.177508
	BnaA07NPF2.19	0.0890489	0.435797	0.204336	2.04255e-33	271	0.184325
	BnaC06NPF2.20	0.0912337	0.417254	0.218652	6.38259e-31	269	0.180355
	BnaA07NPF2.21	0.0867077	0.356373	0.243306	1.22775e-22	224	0.162946
	BnaC06NPF2.22	0.0819292	0.389709	0.210232	2.46506e-21	169	0.168662
	BnaA02NPF2.23	0.0988451	0.568403	0.1739	2.36563e-39	280	0.227744
	BnaC02NPF2.24	0.101007	0.602596	0.167619	4.93306e-41	286	0.234994
	BnaC01NPF2.25	0.380382	0.286203	1.32907	0.0669559	222	0.353202
	BnaC01NPF2.27	0.11003	0.436625	0.252	2.81853e-23	247	0.201851
	BnaA01NPF2.28	0.1183	0.417185	0.283567	2.27994e-19	253	0.201298
average value				0.555736
NPF3	BnaA07NPF3.1	0.0374657	0.473542	0.079118	8.19774e-61	210	0.15529
	BnaC06NPF3.2	0.0351305	0.464797	0.0755824	3.45891e-61	206	0.152287
	BnaA02NPF3.3	0.0445079	0.454652	0.0978944	1.16525e-54	222	0.161345
	BnaC02NPF3.4	0.0443315	0.490291	0.0904188	5.47521e-59	228	0.169719
	BnaA07NPF3.5	0.0771361	0.592828	0.130115	1.18945e-43	236	0.222366
	BnaC06NPF3.6	0.0747592	0.595005	0.125645	1.35737e-44	233	0.219918
average value				0.0997956
NPF4	BnaA03NPF4.1	0.116059	0.355887	0.326111	2.96344e-14	233	0.181057
	BnaA03NPF4.2	0.113856	0.410728	0.277204	6.07144e-19	242	0.193079
	BnaC03NPF4.3	0.14851	0.430972	0.344593	1.24865e-14	279	0.223464
	BnaC04NPF4.4	0.143149	0.423582	0.337949	1.84327e-15	278	0.219734
	BnaA07NPF4.5	0.142668	0.409862	0.348087	1.22393e-14	274	0.214822
	BnaC07NPF4.6	0.104879	0.428415	0.244807	1.95387e-26	272	0.197204
	BnaA07NPF4.7	0.101867	0.420504	0.242249	1.48427e-26	267	0.192545
	BnaC06NPF4.8	0.0421609	0.451326	0.0934156	8.57493e-45	170	0.16014
	BnaA07NPF4.9	0.0394247	0.440494	0.0895011	3.65541e-55	207	0.153799
	BnaA06NPF4.10	0.053355	0.418781	0.127405	2.96568e-40	198	0.159084
	BnaC03NPF4.11	0.0504585	0.410147	0.123025	7.1618e-41	192	0.153174
	BnaA01NPF4.12	0.0426107	0.343754	0.123957	8.40119e-38	177	0.12112
	BnaA09NPF4.13	0.0399485	0.340028	0.117486	1.1986e-38	171	0.116476
	BnaC09NPF4.14	0.0413799	0.313295	0.132079	1.38562e-34	168	0.112925
	BnaA09NPF4.15	6.12998	1.73109	3.54111	7.01501e-24	3620	4.93186
	BnaC06NPF4.16	0.0382995	0.331477	0.115542	3.04257e-39	173	0.116295
average value				0.411533
NPF5	BnaA05NPF5.1	5.19955	1.44206	3.60565	3.24254e-09	1034	4.1456
	BnaC04NPF5.2	0.0779149	0.404323	0.192705	1.05531e-24	186	0.170679
	BnaC04NPF5.3	0.120603	0.0371998	3.24202	1.64842e-06	143	0.0991912
	BnaA05NPF5.5	0.0641169	0.350411	0.182976	2.13751e-29	206	0.142477
	BnaC04NPF5.6	0.0607118	0.345868	0.175535	2.18069e-27	181	0.141866
	BnaC03NPF5.7	0.140015	0.0447475	3.12901	6.66074e-06	142	0.116805
	BnaA03NPF5.8	0.180316	0.0818976	2.20173	0.00010246	195	0.1577
	BnaC09NPF5.9	0.0384624	0.484045	0.0794604	1.88479e-58	207	0.160168
	BnaA09NPF5.10	0.0395718	0.467211	0.084698	1.18253e-55	205	0.157287
	BnaA02NPF5.11	0.103153	0.365116	0.28252	8.14558e-21	258	0.174688
	BnaC02NPF5.12	0.102724	0.408048	0.251744	3.78166e-25	269	0.187146
	BnaA02NPF5.13	0.10303	0.53337	0.193167	2.62211e-36	291	0.217397
	BnaC02NPF5.14	0.111218	0.486684	0.228523	4.00046e-22	217	0.210207
	BnaA02NPF5.15	0.179864	0.150477	1.19529	0.292562	210	0.172841
	BnaA09NPF5.16	0.103836	0.465385	0.223119	2.96618e-29	279	0.202598
	BnaC09NPF5.17	0.106377	0.501329	0.212191	5.11663e-29	267	0.2135
	BnaA09NPF5.18	0.10247	0.499627	0.205094	1.25737e-22	193	0.208684
	BnaC09NPF5.19	0.103802	0.521334	0.199108	1.39746e-25	212	0.214731
	BnaA09NPF5.20	0.073912	0.396229	0.186539	7.81001e-23	160	0.164304
	BnaC08NPF5.21	0.0679351	0.366578	0.185322	3.09232e-26	183	0.151256
	BnaC03NPF5.22	0.0690943	0.313259	0.220566	1.87127e-23	199	0.135368
	BnaC03NPF5.22	0.0690943	0.313259	0.220566	1.87127e-23	199	0.135368
	BnaA03NPF5.23	0.0839713	0.35383	0.237321	1.44536e-23	227	0.15745
	BnaA05NPF5.24	0.101638	0.333278	0.304964	3.25031e-17	240	0.164555
	BnaC04NPF5.25	0.105602	0.340239	0.310375	4.09586e-17	246	0.169435
	BnaA04NPF5.26	0.0870006	0.428862	0.202864	1.75824e-30	254	0.179053
	BnaC04NPF5.27	0.0829017	0.421369	0.196744	9.31482e-31	248	0.174758
	BnaA07NPF5.28	0.0783359	0.383826	0.204092	1.56751e-29	235	0.161418
	BnaC06NPF5.29	0.0837546	0.366562	0.228487	1.50376e-25	235	0.159136
	BnaC08NPF5.30	0.109823	0.402056	0.273154	7.7693e-14	166	0.187809
	BnaA09NPF5.31	0.0908168	0.303236	0.299493	1.53092e-16	222	0.149624
	BnaA02NPF5.32	0.0600802	0.401476	0.149648	1.24445e-34	195	0.149664
	BnaC02NPF5.33	0.0544597	0.42243	0.12892	1.31454e-38	189	0.146482
	BnaC09NPF5.34	0.0646995	0.363757	0.177865	1.00006e-28	189	0.137754
	BnaC09NPF5.35	0.0630293	0.367848	0.171346	6.26157e-30	189	0.138068
	BnaA10NPF5.36	0.0588134	0.340575	0.172689	8.32736e-28	178	0.129398
	BnaC05NPF5.37	0.0705844	0.447484	0.157736	4.51277e-26	156	0.170083
	BnaC05NPF5.38	0.0566509	0.374852	0.151129	1.09528e-34	197	0.143795
	BnaC06NPF5.39	0.13434	0.354588	0.378862	2.03356e-10	215	0.195007
	BnaA02NPF5.40	0.284342	0.134795	2.10944	8.79947e-06	214	0.236665
	BnaC02NPF5.41	0.253442	0.138851	1.82528	0.000124764	281	0.224593
	BnaC06NPF5.42	0.270024	0.141155	1.91297	7.63902e-06	277	0.229069
	BnaC06NPF5.43	0.13573	0.546577	0.248327	1.18054e-25	296	0.245347
	BnaC06NPF5.44	0.127391	0.445317	0.286068	2.03994e-19	264	0.208387
	BnaC02NPF5.45	0.177469	0.414876	0.427764	3.97814e-09	264	0.240918
	BnaA09NPF5.46	0.0598979	0.400967	0.149384	5.41453e-37	211	0.157717
	BnaC05NPF5.47	0.0649869	0.398202	0.163201	3.3112e-35	217	0.161181
	BnaA02NPF5.48	0.0997338	0.482398	0.206746	3.63169e-18	154	0.2001
	BnaC02NPF5.49	0.0991262	0.497423	0.199279	8.5087e-33	268	0.205034
	BnaC06NPF5.50	0.108937	0.520699	0.209213	1.09905e-32	286	0.223629
	BnaA07NPF5.51	0.106004	0.48395	0.219039	1.61476e-29	274	0.209847
	BnaC06NPF5.52	0.169272	0.290876	0.581938	0.00015314	271	0.199825
	BnaC02NPF5.53	0.110573	0.480225	0.230253	6.26989e-27	261	0.212891
	BnaA08NPF5.54	0.136187	0.483277	0.281798	8.54995e-17	225	0.234482
	BnaC08NPF5.55	0.0757883	0.463152	0.163636	3.44248e-38	241	0.182064
	BnaC05NPF5.56	0.0692784	0.449725	0.154046	2.96982e-39	236	0.178665
	BnaA09NPF5.57	0.0698742	0.44897	0.155632	6.08879e-39	235	0.178619
	BnaA07NPF5.58	0.0764657	0.440117	0.17374	9.82409e-36	242	0.183286
	BnaC07NPF5.59	0.0779612	0.458567	0.17001	1.01947e-36	247	0.189172
	BnaA08NPF5.60	0.171513	0.669095	0.256335	5.76847e-24	301	0.309036
	BnaC03NPF5.61	0.14109	0.594309	0.237402	1.45411e-29	318	0.265021
	BnaC03NPF5.62	0.13662	0.557904	0.244881	5.37038e-28	311	0.250316
	BnaA08NPF5.63	0.134201	0.579491	0.231584	1.4993e-29	306	0.255251
average value				0.496527
NPF6	BnaC04NPF6.1	0.0423854	0.382312	0.110866	8.16084e-42	184	0.133595
	BnaA07NPF6.2	0.0449893	0.40161	0.112022	2.15591e-43	193	0.141072
	BnaC07NPF6.3	0.0468358	0.38003	0.123242	1.03593e-39	190	0.136971
	BnaC08NPF6.4	0.0453914	0.450008	0.100868	2.25274e-53	220	0.161185
	BnaA09NPF6.5	0.046136	0.486593	0.0948145	2.06967e-57	228	0.171001
	BnaA08NPF6.6	0.0414754	0.429521	0.096562	3.05771e-52	207	0.149962
	BnaC08NPF6.7	0.0438645	0.412299	0.10639	6.49889e-49	205	0.145689
	BnaA06NPF6.8	0.112098	0.61692	0.181705	1.87412e-35	282	0.253663
	BnaC05NPF6.9	0.0370066	0.410704	0.0901053	6.60919e-33	123	0.146747
	BnaC05NPF6.10	0.0422349	0.471114	0.089649	1.17679e-50	190	0.1557
	BnaA05NPF6.11	0.0441178	0.441087	0.100021	3.52117e-46	187	0.15023
	BnaC01NPF6.12	0.0438127	0.42851	0.102244	2.56557e-44	180	0.147098
	BnaA01NPF6.13	0.0483901	0.422269	0.114596	5.15276e-46	202	0.146527
	BnaA02NPF6.14	0.0300076	0.388628	0.0772143	1.68735e-55	186	0.125509
	BnaC02NPF6.15	0.0337592	0.415689	0.0812127	3.16722e-57	198	0.134823
average value				0.105434
NPF7	BnaA10NPF7.1	0.0703237	0.428504	0.164115	1.33238e-39	246	0.169195
	BnaC09NPF7.2	0.0720372	0.439955	0.163738	3.79015e-40	251	0.17389
	BnaC07NPF7.3	0.0356276	0.431253	0.0826143	8.7175e-55	192	0.141281
	BnaA03NPF7.4	0.0366504	0.432841	0.0846739	1.89495e-54	193	0.142159
	BnaC01NPF7.5	0.0416834	0.387896	0.10746	9.89454e-46	195	0.140276
	BnaA01NPF7.6	0.0441451	0.360658	0.122401	8.74797e-41	190	0.133589
	BnaC05NPF7.7	0.0462314	0.315069	0.146734	5.3294e-34	180	0.117251
	BnaA09NPF7.8	0.0442586	0.319866	0.138366	1.41282e-35	179	0.117898
	BnaC05NPF7.9	0.0497941	0.362379	0.137409	2.01638e-30	153	0.129149
	BnaA05NPF7.10	0.0507925	0.344268	0.147538	4.49075e-28	150	0.125216
average value				0.129505
NPF8	BnaA04NPF8.1	0.0294548	0.584905	0.0503582	3.74959e-75	198	0.163413
	BnaC04NPF8.2	0.0286787	0.644701	0.0444837	3.42719e-82	207	0.17827
	BnaA09NPF8.3	0.0708099	0.509652	0.138938	6.56544e-44	241	0.182681
	BnaC08NPF8.4	0.0932647	0.504276	0.184948	3.88203e-29	218	0.199024
	BnaA10NPF8.5	0.0799504	0.527089	0.151683	9.57906e-43	253	0.193591
	BnaC09NPF8.6	0.0799914	0.522626	0.153057	1.89188e-42	252	0.19213
	BnaC07NPF8.7	0.0200495	0.568162	0.0352884	3.68895e-86	206	0.16946
	BnaA06NPF8.8	0.0204554	0.585378	0.0349439	5.99861e-87	202	0.166494
	BnaC09NPF8.9	0.0228091	0.643011	0.0354724	1.78019e-73	179	0.197059
	BnaA09NPF8.10	0.0248156	0.692552	0.0358322	7.60644e-92	223	0.20477
	BnaA09NPF8.11	0.148509	1.19013	0.124784	2.86615e-65	419	0.418973
	BnaC08NPF8.12	0.156532	1.16543	0.134312	6.46031e-63	430	0.423427
	BnaC05NPF8.13	0.180365	1.24918	0.144386	3.26191e-26	197	0.474784
	BnaC05NPF8.14	0.23986	0.458859	0.522733	4.10462e-08	403	0.302016
	BnaA06NPF8.15	0.24026	0.459927	0.522387	3.26698e-08	404	0.303211
	BnaC02NPF8.16	0.177919	0.734449	0.242248	7.04971e-30	365	0.321223
	BnaA09NPF8.17	0.121359	0.591632	0.205126	4.894e-33	294	0.245733
	BnaC09NPF8.18	0.209739	0.220468	0.951332	0.819246	269	0.21261
	BnaC09NPF8.19	0.520639	0.493061	1.05593	0.431239	249	0.512633
average value				0.25096

## Sheet: Table S3
Table S3. The synteny relationship of NPF genes between B. napus and B. rape and B. oleracea.
B. napus		B. rape and B. oleracea
BnaNPF name	Gene ID	BraNPF/BolNPF name	Gene ID
BnaC05NPF1.5	BnaC05G0440100ZS	BolNPF1.1	Bol011219
BnaC06NPF1.6	BnaC06G0063100ZS	BolNPF1.2	Bol019480
BnaC01NPF1.1	BnaC01G0423800ZS	BolNPF1.3	Bol034764
BnaC09NPF1.9	BnaC09G0540600ZS	BolNPF1.4	Bol043559
BnaC07NPF2.13	BnaC07G0168200ZS	BolNPF2.1	Bol004380
BnaC03NPF2.12	BnaC03G0624300ZS	BolNPF2.10	Bol024931
BnaC01NPF2.25	BnaC01G0407300ZS	BolNPF2.12	Bol030912
BnaC06NPF2.17	BnaC06G0364700ZS	BolNPF2.13	Bol032953
BnaC08NPF2.5	BnaC08G0465800ZS	BolNPF2.15	Bol044846
BnaC02NPF2.16	BnaC02G0243800ZS	BolNPF2.3	Bol015711
BnaC06NPF2.20	BnaC06G0304300ZS	BolNPF2.4	Bol017370
BnaC01NPF2.9	BnaC01G0289500ZS	BolNPF2.5	Bol018722
BnaC06NPF2.22	BnaC06G0364400ZS	BolNPF2.8	Bol023886
BnaC06NPF3.2	BnaC06G0351000ZS	BolNPF3.1	Bol024012
BnaC02NPF3.4	BnaC02G0226800ZS	BolNPF3.2	Bol028660
BnaC07NPF4.6	BnaC07G0167800ZS	BolNPF4.1	Bol004377
BnaC04NPF4.4	BnaC04G0195300ZS	BolNPF4.2	Bol008369
BnaC03NPF4.11	BnaC03G0550400ZS	BolNPF4.3	Bol019436
BnaC06NPF4.8	BnaC06G0364200ZS	BolNPF4.4	Bol023887
BnaC06NPF4.16	BnaC06G0106200ZS	BolNPF4.5	Bol031636
BnaC03NPF4.3	BnaC03G0472200ZS	BolNPF4.7	Bol042488
BnaA04NPF5.4	BnaA04G0257900ZS	BolNPF5.1	Bol005102
BnaC04NPF5.3	BnaC04G0575200ZS	BolNPF5.1	Bol005102
BnaA08NPF5.54	BnaA08G0238700ZS
BnaA08NPF5.60	BnaA08G0227600ZS	BolNPF5.11	Bol024974
BnaC03NPF5.61	BnaC03G0629700ZS	BolNPF5.11	Bol024974
BnaC03NPF5.62	BnaC03G0629600ZS	BolNPF5.10	Bol024973
BnaA08NPF5.63	BnaA08G0227700ZS	BolNPF5.10	Bol024973
BnaC08NPF5.55	BnaC08G0273300ZS	BraNPF5.36	BraA09g040490.3C
BnaC08NPF5.21	BnaC08G0344900ZS
BnaC08NPF5.30	BnaC08G0340200ZS	BolNPF5.12	Bol025161
BnaC09NPF5.34	BnaC09G0513200ZS	BolNPF5.13	Bol030419
BnaC09NPF5.35	BnaC09G0512800ZS	BolNPF5.13	Bol030419
BnaC09NPF5.9	BnaC09G0236800ZS	BolNPF5.14	Bol032092
BnaC09NPF5.17	BnaC09G0236900ZS	BolNPF5.15	Bol032093
BnaC09NPF5.19	BnaC09G0237000ZS	BolNPF5.16	Bol032094
BnaC02NPF5.49	BnaC02G0263100ZS	BolNPF5.17	Bol034906
BnaC02NPF5.41	BnaC02G0263000ZS	BolNPF5.18	Bol034907
BnaC03NPF5.22	BnaC03G0212700ZS	BolNPF5.2	Bol005521
BnaC02NPF5.53	BnaC02G0262700ZS	BolNPF5.20	Bol034909
BnaC06NPF5.43	BnaC06G0291200ZS	BolNPF5.21	Bol040080
BnaA07NPF5.51	BnaA07G0260700ZS	BolNPF5.22	Bol040081
BnaC06NPF5.50	BnaC06G0291300ZS	BolNPF5.22	Bol040081
BnaC02NPF5.45	BnaC02G0262900ZS	BolNPF5.19	Bol034908
BnaC06NPF5.44	BnaC06G0291400ZS	BolNPF5.23	Bol040082
BnaC06NPF5.39	BnaC06G0291500ZS	BolNPF5.24	Bol040083
BnaC06NPF5.52	BnaC06G0291700ZS	BolNPF5.26	Bol040086
BnaC04NPF5.6	BnaC04G0019500ZS	BolNPF5.3	Bol006869
BnaC04NPF5.25	BnaC04G0087800ZS	BolNPF5.4	Bol017730
BnaC04NPF5.2	BnaC04G0084800ZS	BolNPF5.5	Bol017759
BnaC03NPF5.7	BnaC03G0233100ZS	BolNPF5.6	Bol020610
BnaC02NPF5.33	BnaC02G0065800ZS	BolNPF5.7	Bol021204
BnaC02NPF5.12	BnaC02G0405400ZS	BolNPF5.8	Bol022807
BnaC02NPF5.14	BnaC02G0405500ZS	BolNPF5.8	Bol022807
BnaC02NPF1.8	BnaC02G0047000ZS	BolNPF5.9	Bol024715
BnaC01NPF6.12	BnaC01G0378400ZS	BolNPF6.1	Bol023211
BnaC07NPF6.3	BnaC07G0217200ZS	BolNPF6.2	Bol027143
BnaC04NPF6.1	BnaC04G0211400ZS	BolNPF6.3	Bol027769
BnaC05NPF6.9	BnaC05G0104100ZS
BnaC08NPF6.7	BnaC08G0214800ZS	BolNPF6.4	Bol029098
BnaC08NPF6.4	BnaC08G0508100ZS	BolNPF6.5	Bol031348
BnaC05NPF6.10	BnaC05G0366700ZS	BolNPF6.6	Bol038345
BnaC05NPF7.9	BnaC05G0339400ZS	BolNPF7.1	Bol020904
BnaC05NPF7.7	BnaC05G0284500ZS	BolNPF7.2	Bol022226
BnaC07NPF7.3	BnaC07G0437700ZS	BolNPF7.3	Bol024295
BnaC01NPF7.5	BnaC01G0143800ZS	BolNPF7.4	Bol028440
BnaC09NPF7.2	BnaC09G0467200ZS	BolNPF7.5	Bol035883
BnaC02NPF8.16	BnaC02G0432100ZS	BolNPF8.1	Bol015118
BnaC08NPF8.4	BnaC08G0342000ZS	BolNPF8.2	Bol025178
BnaC08NPF8.12	BnaC08G0490000ZS	BolNPF8.3	Bol031509
BnaA06NPF8.15	BnaA06G0096000ZS	BolNPF8.4	Bol038058
BnaC05NPF8.14	BnaC05G0118200ZS	BolNPF8.4	Bol038058
BnaA05NPF1.4	BnaA05G0393300ZS	BraNPF1.1	BraA05g031010.3C
BnaA01NPF1.2	BnaA01G0342900ZS	BraNPF1.3	BraA01g036060.3C
BnaC03NPF1.3	BnaC03G0786000ZS	BraNPF1.3	BraA01g036060.3C
BnaA06NPF1.7	BnaA06G0020000ZS	BraNPF1.4	BraA06g002150.3C
BnaA10NPF1.10	BnaA10G0234500ZS	BraNPF1.5	BraA10g026590.3C
BnaA06NPF2.11	BnaA06G0171200ZS	BraNPF2.10	BraA06g019030.3C
BnaA01NPF2.8	BnaA01G0226600ZS	BraNPF2.11	BraA01g024830.3C
BnaA07NPF2.15	BnaA07G0111300ZS	BraNPF2.16	BraA07g013400.3C
BnaA07NPF2.19	BnaA07G0269600ZS	BraNPF2.19	BraA07g030200.3C
BnaA02NPF2.23	BnaA02G0171600ZS	BraNPF2.2	BraA02g018130.3C
BnaC02NPF2.24	BnaC02G0220900ZS	BraNPF2.2	BraA02g018130.3C
BnaA07NPF2.18	BnaA07G0313400ZS	BraNPF2.20	BraA07g034740.3C
BnaA07NPF2.21	BnaA07G0313300ZS	BraNPF2.21	BraA07g034730.3C
BnaA02NPF2.1	BnaA02G0369800ZS	BraNPF2.22	BraA02g040490.3C
BnaC02NPF2.2	BnaC02G0495700ZS	BraNPF2.22	BraA02g040490.3C
BnaNPF2.29	Bnascaffold0349G0000100ZS	BraNPF2.23	BraA06g020830.3C
BnaNPF2.30	Bnascaffold0418G0000100ZS	BraNPF2.23	BraA06g020830.3C
BnaA07NPF2.14	BnaA07G0114500ZS	BraNPF2.24	BraA07g013790.3C
BnaNPF2.26	Bnascaffold0588G0000100ZS	BraNPF2.3	BraA06g020820.3C
BnaA01NPF2.28	BnaA01G0233600ZS	BraNPF2.4	BraA01g025490.3C
BnaC01NPF2.27	BnaC01G0300100ZS	BraNPF2.4	BraA01g025490.3C
BnaA06NPF2.4	BnaA06G0353000ZS	BraNPF2.6	BraA06g034360.3C
BnaC07NPF2.3	BnaC07G0340400ZS	BraNPF2.6	BraA06g034360.3C
BnaA06NPF2.7	BnaA06G0131200ZS	BraNPF2.8	BraA06g014600.3C
BnaC05NPF2.6	BnaC05G0158700ZS	BraNPF2.8	BraA06g014600.3C
BnaA06NPF2.10	BnaA06G0262200ZS	BraNPF2.9	BraA06g024270.3C
BnaA02NPF3.3	BnaA02G0175100ZS	BraNPF3.1	BraA02g018550.3C
BnaA07NPF3.5	BnaA07G0274500ZS	BraNPF3.2	BraA07g030700.3C
BnaC06NPF3.6	BnaC06G0311200ZS	BraNPF3.2	BraA07g030700.3C
BnaA07NPF3.1	BnaA07G0302600ZS	BraNPF3.3	BraA07g033670.3C
BnaA03NPF4.1	BnaA03G0383800ZS	BraNPF4.1	BraA03g041550.3C
BnaA03NPF4.2	BnaA03G0383900ZS	BraNPF4.2	BraA03g041540.3C
BnaA07NPF4.5	BnaA07G0163300ZS	BraNPF4.3	BraA07g018960.3C
BnaA09NPF4.13	BnaA09G0171300ZS	BraNPF4.4	BraA09g017570.3C
BnaC09NPF4.14	BnaC09G0191200ZS	BraNPF4.4	BraA09g017570.3C
BnaA01NPF4.12	BnaA01G0267600ZS	BraNPF4.5	BraA01g027720.3C
BnaA09NPF4.15	BnaA09G0382500ZS	BraNPF4.6	BraA09g031580.3C
BnaA07NPF4.7	BnaA07G0111100ZS	BraNPF4.7	BraA07g013380.3C
BnaA06NPF4.10	BnaA06G0280600ZS	BraNPF4.8	BraA06g026380.3C
BnaA07NPF4.9	BnaA07G0313200ZS	BraNPF4.9	BraA07g034710.3C
BnaA09NPF5.20	BnaA09G0503800ZS	BraNPF5.10	BraA09g045370.3C
BnaA05NPF5.1	BnaA05G0074000ZS	BraNPF5.11	BraA05g007530.3C
BnaA05NPF5.24	BnaA05G0075500ZS	BraNPF5.13	BraA05g007680.3C
BnaA09NPF5.31	BnaA09G0499800ZS	BraNPF5.14	BraA09g044870.3C
BnaA07NPF5.28	BnaA07G0186100ZS	BraNPF5.16	BraA07g021490.3C
BnaC04NPF5.27	BnaC04G0330000ZS	BraNPF5.16	BraA07g021490.3C
BnaC06NPF5.29	BnaC06G0187000ZS	BraNPF5.16	BraA07g021490.3C
BnaA02NPF5.32	BnaA02G0056300ZS	BraNPF5.20	BraA02g005730.3C
BnaC05NPF5.37	BnaC05G0558500ZS	BraNPF5.21	BraA05g040690.3C
BnaC05NPF5.38	BnaC05G0561000ZS	BraNPF5.21	BraA05g040690.3C
BnaC06NPF5.42	BnaC06G0387700ZS	BraNPF5.27	BraA07g036540.3C
BnaA02NPF5.48	BnaA02G0197800ZS	BraNPF5.29	BraA02g020750.3C
BnaA03NPF5.8	BnaA03G0198100ZS	BraNPF5.3	BraA03g021460.3C
BnaA02NPF5.40	BnaA02G0197600ZS	BraNPF5.33	BraA02g020730.3C
BnaA09NPF5.46	BnaA09G0460500ZS
BnaC05NPF5.47	BnaC05G0196500ZS
BnaA09NPF5.57	BnaA09G0460400ZS	BraNPF5.36	BraA09g040490.3C
BnaA07NPF5.58	BnaA07G0121900ZS	BraNPF5.36	BraA09g040490.3C
BnaC05NPF5.56	BnaC05G0196600ZS	BraNPF5.36	BraA09g040490.3C
BnaC07NPF5.59	BnaC07G0179700ZS	BraNPF5.36	BraA09g040490.3C
BnaA02NPF5.11	BnaA02G0297000ZS	BraNPF5.37	BraA02g032550.3C
BnaA02NPF5.13	BnaA02G0297100ZS	BraNPF5.38	BraA02g032560.3C
BnaA03NPF5.23	BnaA03G0181700ZS	BraNPF5.39	BraA03g019780.3C
BnaA09NPF5.18	BnaA09G0205400ZS	BraNPF5.4	BraA09g021580.3C
BnaA04NPF5.26	BnaA04G0051900ZS	BraNPF5.40	BraA04g005820.3C
BnaA05NPF5.5	BnaA05G0018900ZS	BraNPF5.41	BraA05g001710.3C
BnaC09NPF8.19	BnaC09G0134300ZS	BraNPF5.42	BraA09g012480.3C
BnaA10NPF5.36	BnaA10G0211900ZS	BraNPF5.43	BraA10g024320.3C
BnaA09NPF5.16	BnaA09G0205100ZS	BraNPF5.5	BraA09g021570.3C
BnaA02NPF5.15	BnaA02G0297400ZS	BraNPF5.7	BraA02g032570.3C
BnaA09NPF5.10	BnaA09G0204900ZS	BraNPF5.9	BraA09g021560.3C
BnaA02NPF6.14	BnaA02G0047800ZS	BraNPF6.1	BraA02g004850.3C
BnaC02NPF6.15	BnaC02G0055200ZS	BraNPF6.1	BraA02g004850.3C
BnaA07NPF6.2	BnaA07G0151200ZS	BraNPF6.2	BraA07g017760.3C
BnaA06NPF6.8	BnaA06G0084100ZS	BraNPF6.3	BraA06g009470.3C
BnaA08NPF6.6	BnaA08G0280200ZS	BraNPF6.4	BraA08g031180.3C
BnaA09NPF6.5	BnaA09G0649200ZS	BraNPF6.5	BraA09g060970.3C
BnaA01NPF6.13	BnaA01G0305900ZS	BraNPF6.7	BraA01g032090.3C
BnaA05NPF6.11	BnaA05G0341900ZS	BraNPF6.8	BraA05g025490.3C
BnaA10NPF7.1	BnaA10G0178800ZS	BraNPF7.1	BraA10g020730.3C
BnaA01NPF7.6	BnaA01G0117900ZS	BraNPF7.3	BraA01g012370.3C
BnaA03NPF7.4	BnaA03G0461700ZS	BraNPF7.4	BraA03g049670.3C
BnaA05NPF7.10	BnaA05G0324300ZS	BraNPF7.6	BraA05g023200.3C
BnaA09NPF7.8	BnaA09G0391300ZS	BraNPF7.7	BraA09g032690.3C
BnaA09NPF8.3	BnaA09G0501400ZS	BraNPF8.1	BraA09g045140.3C
BnaA09NPF8.11	BnaA09G0632300ZS	BraNPF8.10	BraA09g059270.3C
BnaC05NPF8.13	BnaC05G0217900ZS
BnaA04NPF8.1	BnaA04G0050300ZS	BraNPF8.2	BraA04g005660.3C
BnaC04NPF8.2	BnaC04G0327600ZS	BraNPF8.2	BraA04g005660.3C
BnaA10NPF8.5	BnaA10G0300400ZS	BraNPF8.3	BraA10g033660.3C
BnaC09NPF8.6	BnaC09G0621500ZS	BraNPF8.3	BraA10g033660.3C
BnaA06NPF8.8	BnaA06G0404900ZS	BraNPF8.4	BraA06g039940.3C
BnaC07NPF8.7	BnaC07G0275200ZS	BraNPF8.4	BraA06g039940.3C
BnaA09NPF8.10	BnaA09G0220300ZS	BraNPF8.7	BraA09g023370.3C
BnaC09NPF8.9	BnaC09G0256200ZS	BraNPF8.7	BraA09g023370.3C
BnaA09NPF8.17	BnaA09G0220200ZS	BraNPF8.8	BraA09g023360.3C
BnaC09NPF8.18	BnaC09G0256100ZS	BraNPF8.8	BraA09g023360.3C
		BolNPF2.2	Bol013180
		BolNPF2.6	Bol019440
		BolNPF2.7	Bol020391
		BolNPF2.9	Bol024088
		BolNPF2.11	Bol030729
		BolNPF2.14	Bol041353
		BolNPF4.6	Bol036561
		BolNPF4.8	Bol042489
		BolNPF5.25	Bol040085
		BraNPF1.5	BraA10g026590.3C
		BraNPF2.7	BraA09g056980.3C
		BraNPF2.12	BraA06g026290.3C
		BraNPF2.13	BraA02g043810.3C
		BraNPF2.15	BraA09g007380.3C
		BraNPF2.18	BraA02g019460.3C
		BraNPF2.25	BraA08g028470.3C
		BraNPF2.26	BraA09g007360.3C
		BraNPF8.9	BraA02g035310.3C

## Sheet: Table S4
Table S4. The CREs detedted in the promoter of the BnaNPF genes.
BnaNPF genes	CRE symbol	CRE sequence	Position	Size	Sense and antisense strands	Species	Function annotation information
BnaA01NPF1.2	ABRE	ACGTG	818	5	-	Arabidopsis thaliana	cis-acting element involved in the abscisic acid responsiveness
BnaA01NPF1.2	ABRE	ACGTG	1119	5	+	Arabidopsis thaliana	cis-acting element involved in the abscisic acid responsiveness
BnaA01NPF1.2	ABRE	ACGTG	1555	5	+	Arabidopsis thaliana	cis-acting element involved in the abscisic acid responsiveness
BnaA01NPF1.2	AT-rich element	ATAGAAATCAA	147	10	+	Glycine max	binding site of AT-rich DNA binding protein (ATBP-1)
BnaA01NPF1.2	TATA-box	ATATAA	946	6	+	Brassica oleracea	core promoter element around -30 of transcription start
BnaA01NPF1.2	TATA-box	ATATAA	1779	6	+	Brassica oleracea	core promoter element around -30 of transcription start
BnaA01NPF1.2	TATA-box	ATATAT	1021	6	-	Brassica napus	core promoter element around -30 of transcription start
BnaA01NPF1.2	TATA-box	ATATAT	1464	6	-	Brassica napus	core promoter element around -30 of transcription start
BnaA01NPF1.2	TATA-box	ATATAT	1621	6	-	Brassica napus	core promoter element around -30 of transcription start
BnaA01NPF1.2	Box 4	ATTAAT	186	6	+	Petroselinum crispum	part of a conserved DNA module involved in light responsiveness
BnaA01NPF1.2	Box 4	ATTAAT	975	6	+	Petroselinum crispum	part of a conserved DNA module involved in light responsiveness
BnaA01NPF1.2	TATA-box	ATTATA	324	6	+	Brassica napus	core promoter element around -30 of transcription start
BnaA01NPF1.2	TATA-box	ATTATA	350	6	+	Brassica napus	core promoter element around -30 of transcription start
BnaA01NPF1.2	TATA-box	ATTATA	522	6	+	Brassica napus	core promoter element around -30 of transcription start
BnaA01NPF1.2	TATA-box	ATTATA	1003	6	+	Brassica napus	core promoter element around -30 of transcription start
BnaA01NPF1.2	TATA-box	ATTATA	1075	6	+	Brassica napus	core promoter element around -30 of transcription start
BnaA01NPF1.2	TATA-box	ATTATA	1338	6	+	Brassica napus	core promoter element around -30 of transcription start
BnaA01NPF1.2	TATA-box	ATTATA	1646	6	+	Brassica napus	core promoter element around -30 of transcription start
BnaA01NPF1.2	TATA-box	ATTATA	1808	6	+	Brassica napus	core promoter element around -30 of transcription start
BnaA01NPF1.2	ERE	ATTTTAAA	1749	8	+	Nicotiana glutinos
BnaA01NPF1.2	CAAT-box	CAAAT	244	5	-	Pisum sativum	common cis-acting element in promoter and enhancer regions
BnaA01NPF1.2	CAAT-box	CAAAT	347	5	+	Pisum sativum	common cis-acting element in promoter and enhancer regions
BnaA01NPF1.2	CAAT-box	CAAAT	364	5	-	Pisum sativum	common cis-acting element in promoter and enhancer regions
BnaA01NPF1.2	CAAT-box	CAAAT	497	5	-	Pisum sativum	common cis-acting element in promoter and enhancer regions
BnaA01NPF1.2	CAAT-box	CAAAT	543	5	-	Pisum sativum	common cis-acting element in promoter and enhancer regions
BnaA01NPF1.2	CAAT-box	CAAAT	636	5	-	Pisum sativum	common cis-acting element in promoter and enhancer regions
BnaA01NPF1.2	CAAT-box	CAAAT	826	5	-	Pisum sativum	common cis-acting element in promoter and enhancer regions
BnaA01NPF1.2	CAAT-box	CAAAT	1216	5	-	Pisum sativum	common cis-acting element in promoter and enhancer regions
BnaA01NPF1.2	CAAT-box	CAAAT	1347	5	-	Pisum sativum	common cis-acting element in promoter and enhancer regions
BnaA01NPF1.2	CAAT-box	CAAAT	1406	5	+	Pisum sativum	common cis-acting element in promoter and enhancer regions
BnaA01NPF1.2	CAAT-box	CAAAT	1827	5	-	Pisum sativum	common cis-acting element in promoter and enhancer regions
BnaA01NPF1.2	MYB	CAACCA	128	6	-	Arabidopsis thaliana
BnaA01NPF1.2	CAAT-box	CAAT	70	4	-	Nicotiana glutinosa
BnaA01NPF1.2	CAAT-box	CAAT	362	4	+	Nicotiana glutinosa
BnaA01NPF1.2	CAAT-box	CAAT	573	4	-	Nicotiana glutinosa
BnaA01NPF1.2	CAAT-box	CAAT	624	4	+	Nicotiana glutinosa
BnaA01NPF1.2	CAAT-box	CAAT	698	4	-	Nicotiana glutinosa
BnaA01NPF1.2	CAAT-box	CAAT	802	4	+	Nicotiana glutinosa
BnaA01NPF1.2	CAAT-box	CAAT	886	4	-	Nicotiana glutinosa
BnaA01NPF1.2	CAAT-box	CAAT	890	4	-	Nicotiana glutinosa
BnaA01NPF1.2	CAAT-box	CAAT	1295	4	-	Nicotiana glutinosa
BnaA01NPF1.2	CAAT-box	CAAT	1657	4	+	Nicotiana glutinosa
BnaA01NPF1.2	CAAT-box	CAAT	1775	4	-	Nicotiana glutinosa
BnaA01NPF1.2	CAAT-box	CAAT	1820	4	+	Nicotiana glutinosa
BnaA01NPF1.2	CAAT-box	CAAT	1868	4	-	Nicotiana glutinosa
BnaA01NPF1.2	ABRE4	CACGTA	818	6	+	Zea mays
BnaA01NPF1.2	G-box	CACGTC	1554	6	-	Zea mays	cis-acting regulatory element involved in light responsiveness
BnaA01NPF1.2	G-Box	CACGTT	1118	6	-	Pisum sativum	cis-acting regulatory element involved in light responsiveness
BnaA01NPF1.2	MYC	CATTTG	825	6	+	Arabidopsis thaliana
BnaA01NPF1.2	CAAT-box	CCAAT	135	5	-	Arabidopsis thaliana	common cis-acting element in promoter and enhancer regions
BnaA01NPF1.2	CAAT-box	CCAAT	232	5	-	Arabidopsis thaliana	common cis-acting element in promoter and enhancer regions
BnaA01NPF1.2	CAAT-box	CCAAT	623	5	+	Arabidopsis thaliana	common cis-acting element in promoter and enhancer regions
BnaA01NPF1.2	CAAT-box	CCAAT	1579	5	-	Arabidopsis thaliana	common cis-acting element in promoter and enhancer regions
BnaA01NPF1.2	LTR	CCGAAA	159	6	-	Hordeum vulgare	cis-acting element involved in low-temperature responsiveness
BnaA01NPF1.2	LTR	CCGAAA	1398	6	-	Hordeum vulgare	cis-acting element involved in low-temperature responsiveness
BnaA01NPF1.2	CGTCA-motif	CGTCA	256	5	-	Hordeum vulgare	cis-acting regulatory element involved in the MeJA-responsiveness
BnaA01NPF1.2	CGTCA-motif	CGTCA	652	5	-	Hordeum vulgare	cis-acting regulatory element involved in the MeJA-responsiveness
BnaA01NPF1.2	CGTCA-motif	CGTCA	1531	5	-	Hordeum vulgare	cis-acting regulatory element involved in the MeJA-responsiveness
BnaA01NPF1.2	CGTCA-motif	CGTCA	1553	5	-	Hordeum vulgare	cis-acting regulatory element involved in the MeJA-responsiveness
BnaA01NPF1.2	Unnamed__1	CGTGG	1120	5	+	Zea mays
BnaA01NPF1.2	Unnamed__4	CTCC	28	4	+	Petroselinum hortense
BnaA01NPF1.2	Unnamed__4	CTCC	53	4	-	Petroselinum hortense
BnaA01NPF1.2	Unnamed__4	CTCC	248	4	-	Petroselinum hortense
BnaA01NPF1.2	Unnamed__4	CTCC	269	4	-	Petroselinum hortense
BnaA01NPF1.2	Unnamed__4	CTCC	550	4	-	Petroselinum hortense
BnaA01NPF1.2	Unnamed__4	CTCC	558	4	-	Petroselinum hortense
BnaA01NPF1.2	Unnamed__4	CTCC	1123	4	-	Petroselinum hortense
BnaA01NPF1.2	Unnamed__4	CTCC	1376	4	+	Petroselinum hortense
BnaA01NPF1.2	Unnamed__4	CTCC	1856	4	+	Petroselinum hortense
BnaA01NPF1.2	O2-site	GATGACATGG	1559	9	+	Zea mays	cis-acting regulatory element involved in zein metabolism regulation
BnaA01NPF1.2	DRE core	GCCGAC	237	6	+	Arabidopsis thaliana
BnaA01NPF1.2	O2-site	GTTGACGTGA	1551	9	+	Zea mays	cis-acting regulatory element involved in zein metabolism regulation
BnaA01NPF1.2	AT-rich sequence	TAAAATACT	1671	9	+	Pisum sativum	element for maximal elicitor-mediated activation (2copies)
BnaA01NPF1.2	G-box	TAAACGTG	1116	8	+	Brassica oleracea	cis-acting regulatory element involved in light responsiveness
BnaA01NPF1.2	MYB-like sequence	TAACCA	118	6	-	Arabidopsis thaliana
BnaA01NPF1.2	MYB-like sequence	TAACCA	1517	6	-	Arabidopsis thaliana
BnaA01NPF1.2	MYB	TAACCA	118	6	-	Arabidopsis thaliana
BnaA01NPF1.2	MYB	TAACCA	1517	6	-	Arabidopsis thaliana
BnaA01NPF1.2	Myb	TAACTG	805	6	+	Arabidopsis thaliana
BnaA01NPF1.2	TATA-box	TACAAAA	564	7	-	Oryza sativa	core promoter element around -30 of transcription start
BnaA01NPF1.2	TATA-box	TACAAAA	1848	7	-	Oryza sativa	core promoter element around -30 of transcription start
BnaA01NPF1.2	G-box	TACGTG	818	6	-	Arabidopsis thaliana	cis-acting regulatory element involved in light responsiveness
BnaA01NPF1.2	ABRE3a	TACGTG	818	6	-	Zea mays
BnaA01NPF1.2	TATA-box	TATA	103	4	+	Arabidopsis thaliana	core promoter element around -30 of transcription start
BnaA01NPF1.2	TATA-box	TATA	122	4	+	Arabidopsis thaliana	core promoter element around -30 of transcription start
BnaA01NPF1.2	TATA-box	TATA	326	4	+	Arabidopsis thaliana	core promoter element around -30 of transcription start
BnaA01NPF1.2	TATA-box	TATA	352	4	+	Arabidopsis thaliana	core promoter element around -30 of transcription start
BnaA01NPF1.2	TATA-box	TATA	472	4	+	Arabidopsis thaliana	core promoter element around -30 of transcription start
BnaA01NPF1.2	TATA-box	TATA	494	4	+	Arabidopsis thaliana	core promoter element around -30 of transcription start
BnaA01NPF1.2	TATA-box	TATA	524	4	+	Arabidopsis thaliana	core promoter element around -30 of transcription start
BnaA01NPF1.2	TATA-box	TATA	947	4	+	Arabidopsis thaliana	core promoter element around -30 of transcription start
BnaA01NPF1.2	TATA-box	TATA	1005	4	-	Arabidopsis thaliana	core promoter element around -30 of transcription start
BnaA01NPF1.2	TATA-box	TATA	1024	4	-	Arabidopsis thaliana	core promoter element around -30 of transcription start
BnaA01NPF1.2	TATA-box	TATA	1072	4	-	Arabidopsis thaliana	core promoter element around -30 of transcription start
BnaA01NPF1.2	TATA-box	TATA	1077	4	-	Arabidopsis thaliana	core promoter element around -30 of transcription start
BnaA01NPF1.2	TATA-box	TATA	1340	4	-	Arabidopsis thaliana	core promoter element around -30 of transcription start
BnaA01NPF1.2	TATA-box	TATA	1465	4	-	Arabidopsis thaliana	core promoter element around -30 of transcription start
BnaA01NPF1.2	TATA-box	TATA	1599	4	-	Arabidopsis thaliana	core promoter element around -30 of transcription start
BnaA01NPF1.2	TATA-box	TATA	1624	4	-	Arabidopsis thaliana	core promoter element around -30 of transcription start
BnaA01NPF1.2	TATA-box	TATA	1648	4	-	Arabidopsis thaliana	core promoter element around -30 of transcription start
BnaA01NPF1.2	TATA-box	TATA	1723	4	-	Arabidopsis thaliana	core promoter element around -30 of transcription start
BnaA01NPF1.2	TATA-box	TATA	1780	4	-	Arabidopsis thaliana	core promoter element around -30 of transcription start
BnaA01NPF1.2	TATA-box	TATA	1810	4	-	Arabidopsis thaliana	core promoter element around -30 of transcription start
BnaA01NPF1.2	TATA-box	TATAA	121	5	-	Arabidopsis thaliana	core promoter element around -30 of transcription start
BnaA01NPF1.2	TATA-box	TATAA	325	5	-	Arabidopsis thaliana	core promoter element around -30 of transcription start
BnaA01NPF1.2	TATA-box	TATAA	351	5	-	Arabidopsis thaliana	core promoter element around -30 of transcription start
BnaA01NPF1.2	TATA-box	TATAA	523	5	-	Arabidopsis thaliana	core promoter element around -30 of transcription start
BnaA01NPF1.2	TATA-box	TATAA	1004	5	-	Arabidopsis thaliana	core promoter element around -30 of transcription start
BnaA01NPF1.2	TATA-box	TATAA	1076	5	-	Arabidopsis thaliana	core promoter element around -30 of transcription start
BnaA01NPF1.2	TATA-box	TATAA	1339	5	-	Arabidopsis thaliana	core promoter element around -30 of transcription start
BnaA01NPF1.2	TATA-box	TATAA	1598	5	-	Arabidopsis thaliana	core promoter element around -30 of transcription start
BnaA01NPF1.2	TATA-box	TATAA	1647	5	-	Arabidopsis thaliana	core promoter element around -30 of transcription start
BnaA01NPF1.2	TATA-box	TATAA	1809	5	-	Arabidopsis thaliana	core promoter element around -30 of transcription start
BnaA01NPF1.2	Unnamed__6	taTAAATATct	1340	10	+	Zea mays
BnaA01NPF1.2	TATA-box	TATATA	1022	6	-	Arabidopsis thaliana	core promoter element around -30 of transcription start
BnaA01NPF1.2	TATA-box	TATATA	1463	6	-	Arabidopsis thaliana	core promoter element around -30 of transcription start
BnaA01NPF1.2	TATA-box	TATATA	1622	6	-	Arabidopsis thaliana	core promoter element around -30 of transcription start
BnaA01NPF1.2	AT~TATA-box	TATATA	1022	6	-	Arabidopsis thaliana
BnaA01NPF1.2	AT~TATA-box	TATATA	1463	6	-	Arabidopsis thaliana
BnaA01NPF1.2	AT~TATA-box	TATATA	1622	6	-	Arabidopsis thaliana
BnaA01NPF1.2	TATC-box	TATCCCA	2	7	-	Oryza sativa	cis-acting element involved in gibberellin-responsiveness
BnaA01NPF1.2	TATA-box	TATTTAAA	289	8	-	Arabidopsis thaliana	core promoter element around -30 of transcription start
BnaA01NPF1.2	TATA-box	TATTTAAA	1467	8	+	Arabidopsis thaliana	core promoter element around -30 of transcription start
BnaA01NPF1.2	TATA-box	TATTTAAA	1469	8	-	Arabidopsis thaliana	core promoter element around -30 of transcription start
BnaA01NPF1.2	TCT-motif	TCTTAC	602	6	+	Arabidopsis thaliana	part of a light responsive element
BnaA01NPF1.2	TCT-motif	TCTTAC	960	6	+	Arabidopsis thaliana	part of a light responsive element
BnaA01NPF1.2	TCT-motif	TCTTAC	1031	6	+	Arabidopsis thaliana	part of a light responsive element
BnaA01NPF1.2	as-1	TGACG	256	5	+	Arabidopsis thaliana
BnaA01NPF1.2	as-1	TGACG	652	5	+	Arabidopsis thaliana
BnaA01NPF1.2	as-1	TGACG	1531	5	+	Arabidopsis thaliana
BnaA01NPF1.2	as-1	TGACG	1553	5	+	Arabidopsis thaliana
BnaA01NPF1.2	TGACG-motif	TGACG	256	5	+	Hordeum vulgare	cis-acting regulatory element involved in the MeJA-responsiveness
BnaA01NPF1.2	TGACG-motif	TGACG	652	5	+	Hordeum vulgare	cis-acting regulatory element involved in the MeJA-responsiveness
BnaA01NPF1.2	TGACG-motif	TGACG	1531	5	+	Hordeum vulgare	cis-acting regulatory element involved in the MeJA-responsiveness
BnaA01NPF1.2	TGACG-motif	TGACG	1553	5	+	Hordeum vulgare	cis-acting regulatory element involved in the MeJA-responsiveness
BnaA01NPF1.2	Box II	TGGTAATAA	1203	9	+	Solanum tuberosum	part of a light responsive element
BnaA01NPF1.2	W box	TTGACC	1307	6	+	Arabidopsis thaliana
BnaA01NPF2.28	ARE	AAACCA	126	6	+	Zea mays	cis-acting regulatory element essential for the anaerobic induction
BnaA01NPF2.28	ARE	AAACCA	285	6	+	Zea mays	cis-acting regulatory element essential for the anaerobic induction
BnaA01NPF2.28	ARE	AAACCA	732	6	-	Zea mays	cis-acting regulatory element essential for the anaerobic induction
BnaA01NPF2.28	TGA-element	AACGAC	1202	6	-	Brassica oleracea	auxin-responsive element
BnaA01NPF2.28	GATA-motif	AAGGATAAGG	1347	9	-	Solanum tuberosum	part of a light responsive element
BnaA01NPF2.28	ABRE	ACGTG	1839	5	-	Arabidopsis thaliana	cis-acting element involved in the abscisic acid responsiveness
BnaA01NPF2.28	box S	AGCCACC	1671	7	-	Arabidopsis thaliana
BnaA01NPF2.28	TATA-box	ATATAA	15	6	+	Brassica oleracea	core promoter element around -30 of transcription start
BnaA01NPF2.28	TATA-box	ATATAA	454	6	+	Brassica oleracea	core promoter element around -30 of transcription start
BnaA01NPF2.28	TATA-box	ATATAA	1562	6	+	Brassica oleracea	core promoter element around -30 of transcription start
BnaA01NPF2.28	TATA-box	ATATAT	48	6	+	Brassica napus	core promoter element around -30 of transcription start
BnaA01NPF2.28	Box 4	ATTAAT	161	6	+	Petroselinum crispum	part of a conserved DNA module involved in light responsiveness
BnaA01NPF2.28	Box 4	ATTAAT	762	6	+	Petroselinum crispum	part of a conserved DNA module involved in light responsiveness
BnaA01NPF2.28	Box 4	ATTAAT	1468	6	-	Petroselinum crispum	part of a conserved DNA module involved in light responsiveness
BnaA01NPF2.28	TATA-box	ATTATA	58	6	+	Brassica napus	core promoter element around -30 of transcription start
BnaA01NPF2.28	TATA-box	ATTATA	401	6	+	Brassica napus	core promoter element around -30 of transcription start
BnaA01NPF2.28	TATA-box	ATTATA	1570	6	+	Brassica napus	core promoter element around -30 of transcription start
BnaA01NPF2.28	ERE	ATTTTAAA	22	8	-	Nicotiana glutinos
BnaA01NPF2.28	circadian	CAAAGATATC	842	9	-	Lycopersicon esculentum	cis-acting regulatory element involved in circadian control
BnaA01NPF2.28	circadian	CAAAGATATC	1710	9	+	Lycopersicon esculentum	cis-acting regulatory element involved in circadian control
BnaA01NPF2.28	CAAT-box	CAAAT	518	5	+	Pisum sativum	common cis-acting element in promoter and enhancer regions
BnaA01NPF2.28	CAAT-box	CAAAT	1012	5	+	Pisum sativum	common cis-acting element in promoter and enhancer regions
BnaA01NPF2.28	CAAT-box	CAAAT	1138	5	-	Pisum sativum	common cis-acting element in promoter and enhancer regions
BnaA01NPF2.28	CAAT-box	CAAAT	1330	5	-	Pisum sativum	common cis-acting element in promoter and enhancer regions
BnaA01NPF2.28	CAAT-box	CAAAT	1418	5	+	Pisum sativum	common cis-acting element in promoter and enhancer regions
BnaA01NPF2.28	CAAT-box	CAAAT	1449	5	+	Pisum sativum	common cis-acting element in promoter and enhancer regions
BnaA01NPF2.28	CAAT-box	CAAAT	1524	5	+	Pisum sativum	common cis-acting element in promoter and enhancer regions
BnaA01NPF2.28	Gap-box	CAAATGAA(A/G)A	1449	9.5	+	Arabidopsis thaliana	part of a light responsive element
BnaA01NPF2.28	CCAAT-box	CAACGG	207	6	-	Hordeum vulgare	MYBHv1 binding site
BnaA01NPF2.28	CAAT-box	CAAT	218	4	+	Nicotiana glutinosa
BnaA01NPF2.28	CAAT-box	CAAT	406	4	-	Nicotiana glutinosa
BnaA01NPF2.28	CAAT-box	CAAT	491	4	-	Nicotiana glutinosa
BnaA01NPF2.28	CAAT-box	CAAT	539	4	+	Nicotiana glutinosa
BnaA01NPF2.28	CAAT-box	CAAT	779	4	-	Nicotiana glutinosa
BnaA01NPF2.28	CAAT-box	CAAT	1001	4	+	Nicotiana glutinosa
BnaA01NPF2.28	CAAT-box	CAAT	1184	4	-	Nicotiana glutinosa
BnaA01NPF2.28	CAAT-box	CAAT	1516	4	+	Nicotiana glutinosa
BnaA01NPF2.28	CAAT-box	CAAT	1700	4	+	Nicotiana glutinosa
BnaA01NPF2.28	CAAT-box	CAAT	1758	4	+	Nicotiana glutinosa
BnaA01NPF2.28	CAAT-box	CAAT	1760	4	-	Nicotiana glutinosa
BnaA01NPF2.28	CAAT-box	CAAT	1895	4	-	Nicotiana glutinosa
BnaA01NPF2.28	CAAT-box	CAAT	1900	4	+	Nicotiana glutinosa
BnaA01NPF2.28	MYC	CAATTG	1758	6	-	Arabidopsis thaliana
BnaA01NPF2.28	G-Box	CACGTT	1839	6	+	Pisum sativum	cis-acting regulatory element involved in light responsiveness
BnaA01NPF2.28	MYC	CATGTG	611	6	-	Arabidopsis thaliana
BnaA01NPF2.28	MYC	CATGTG	1720	6	+	Arabidopsis thaliana
BnaA01NPF2.28	MYC	CATTTG	1137	6	+	Arabidopsis thaliana
BnaA01NPF2.28	MYC	CATTTG	1449	6	-	Arabidopsis thaliana
BnaA01NPF2.28	CAAT-box	CCAAT	1325	5	-	Arabidopsis thaliana	common cis-acting element in promoter and enhancer regions
BnaA01NPF2.28	CAAT-box	CCAAT	1668	5	-	Arabidopsis thaliana	common cis-acting element in promoter and enhancer regions
BnaA01NPF2.28	Unnamed__2	CCCCGG	914	6	-	Zea mays
BnaA01NPF2.28	MYB recognition site	CCGTTG	207	6	+	Arabidopsis thaliana
BnaA01NPF2.28	TATA-box	ccTATAAAaa	94	9	+	Arabidopsis thaliana	core promoter element around -30 of transcription start
BnaA01NPF2.28	P-box	CCTTTTG	727	7	+	Oryza sativa	gibberellin-responsive element
BnaA01NPF2.28	Unnamed__4	CTCC	693	4	+	Petroselinum hortense
BnaA01NPF2.28	Unnamed__4	CTCC	746	4	+	Petroselinum hortense
BnaA01NPF2.28	Unnamed__4	CTCC	967	4	+	Petroselinum hortense
BnaA01NPF2.28	Unnamed__4	CTCC	1243	4	+	Petroselinum hortense
BnaA01NPF2.28	Unnamed__4	CTCC	1351	4	+	Petroselinum hortense
BnaA01NPF2.28	Unnamed__4	CTCC	1661	4	+	Petroselinum hortense
BnaA01NPF2.28	AAGAA-motif	GAAAGAA	313	7	-	Avena sativa
BnaA01NPF2.28	GATA-motif	GATAGGG	598	7	-	Pisum sativum	part of a light responsive element
BnaA01NPF2.28	GTGGC-motif	GATTCTGTGGC	893	10	+	Spinacia oleracea	part of a light responsive element
BnaA01NPF2.28	ABRE	GCAACGTGTC	579	9	-	Hordeum vulgare	cis-acting element involved in the abscisic acid responsiveness
BnaA01NPF2.28	GT1-motif	GGTTAA	738	6	+	Arabidopsis thaliana	light responsive element
BnaA01NPF2.28	TATA-box	TAAAGATT	1565	8	+	Arabidopsis thaliana	core promoter element around -30 of transcription start
BnaA01NPF2.28	MYB	TAACCA	737	6	-	Arabidopsis thaliana
BnaA01NPF2.28	MYB-like sequence	TAACCA	737	6	-	Arabidopsis thaliana
BnaA01NPF2.28	Myb	TAACTG	289	6	-	Arabidopsis thaliana
BnaA01NPF2.28	Myb	TAACTG	1958	6	-	Arabidopsis thaliana
BnaA01NPF2.28	TATA-box	TACAAAA	1920	7	-	Oryza sativa	core promoter element around -30 of transcription start
BnaA01NPF2.28	TATA-box	TACATAAA	1861	8	+	Oryza sativa	core promoter element around -30 of transcription start
BnaA01NPF2.28	TATA-box	TATA	16	4	+	Arabidopsis thaliana	core promoter element around -30 of transcription start
BnaA01NPF2.28	TATA-box	TATA	55	4	+	Arabidopsis thaliana	core promoter element around -30 of transcription start
BnaA01NPF2.28	TATA-box	TATA	60	4	+	Arabidopsis thaliana	core promoter element around -30 of transcription start
BnaA01NPF2.28	TATA-box	TATA	96	4	+	Arabidopsis thaliana	core promoter element around -30 of transcription start
BnaA01NPF2.28	TATA-box	TATA	246	4	+	Arabidopsis thaliana	core promoter element around -30 of transcription start
BnaA01NPF2.28	TATA-box	TATA	403	4	+	Arabidopsis thaliana	core promoter element around -30 of transcription start
BnaA01NPF2.28	TATA-box	TATA	455	4	+	Arabidopsis thaliana	core promoter element around -30 of transcription start
BnaA01NPF2.28	TATA-box	TATA	505	4	+	Arabidopsis thaliana	core promoter element around -30 of transcription start
BnaA01NPF2.28	TATA-box	TATA	532	4	+	Arabidopsis thaliana	core promoter element around -30 of transcription start
BnaA01NPF2.28	TATA-box	TATA	553	4	+	Arabidopsis thaliana	core promoter element around -30 of transcription start
BnaA01NPF2.28	TATA-box	TATA	678	4	+	Arabidopsis thaliana	core promoter element around -30 of transcription start
BnaA01NPF2.28	TATA-box	TATA	720	4	+	Arabidopsis thaliana	core promoter element around -30 of transcription start
BnaA01NPF2.28	TATA-box	TATA	1305	4	-	Arabidopsis thaliana	core promoter element around -30 of transcription start
BnaA01NPF2.28	TATA-box	TATA	1422	4	-	Arabidopsis thaliana	core promoter element around -30 of transcription start
BnaA01NPF2.28	TATA-box	TATA	1439	4	-	Arabidopsis thaliana	core promoter element around -30 of transcription start
BnaA01NPF2.28	TATA-box	TATA	1538	4	-	Arabidopsis thaliana	core promoter element around -30 of transcription start
BnaA01NPF2.28	TATA-box	TATA	1563	4	-	Arabidopsis thaliana	core promoter element around -30 of transcription start
BnaA01NPF2.28	TATA-box	TATA	1572	4	-	Arabidopsis thaliana	core promoter element around -30 of transcription start
BnaA01NPF2.28	TATA-box	TATA	1681	4	-	Arabidopsis thaliana	core promoter element around -30 of transcription start
BnaA01NPF2.28	TATA-box	TATA	1716	4	-	Arabidopsis thaliana	core promoter element around -30 of transcription start
BnaA01NPF2.28	TATA-box	TATA	1859	4	-	Arabidopsis thaliana	core promoter element around -30 of transcription start
BnaA01NPF2.28	TATA-box	TATA	1936	4	-	Arabidopsis thaliana	core promoter element around -30 of transcription start
BnaA01NPF2.28	TATA-box	TATAA	54	5	-	Arabidopsis thaliana	core promoter element around -30 of transcription start
BnaA01NPF2.28	TATA-box	TATAA	59	5	-	Arabidopsis thaliana	core promoter element around -30 of transcription start
BnaA01NPF2.28	TATA-box	TATAA	245	5	-	Arabidopsis thaliana	core promoter element around -30 of transcription start
BnaA01NPF2.28	TATA-box	TATAA	402	5	-	Arabidopsis thaliana	core promoter element around -30 of transcription start
BnaA01NPF2.28	TATA-box	TATAA	504	5	-	Arabidopsis thaliana	core promoter element around -30 of transcription start
BnaA01NPF2.28	TATA-box	TATAA	531	5	-	Arabidopsis thaliana	core promoter element around -30 of transcription start
BnaA01NPF2.28	TATA-box	TATAA	552	5	-	Arabidopsis thaliana	core promoter element around -30 of transcription start
BnaA01NPF2.28	TATA-box	TATAA	719	5	-	Arabidopsis thaliana	core promoter element around -30 of transcription start
BnaA01NPF2.28	TATA-box	TATAA	1571	5	-	Arabidopsis thaliana	core promoter element around -30 of transcription start
BnaA01NPF2.28	TATA-box	TATAA	1680	5	-	Arabidopsis thaliana	core promoter element around -30 of transcription start
BnaA01NPF2.28	TATA-box	TATAA	1935	5	-	Arabidopsis thaliana	core promoter element around -30 of transcription start
BnaA01NPF2.28	TATA-box	TATAAA	53	6	-	Helianthus annuus	core promoter element around -30 of transcription start
BnaA01NPF2.28	TATA-box	TATAAA	244	6	-	Helianthus annuus	core promoter element around -30 of transcription start
BnaA01NPF2.28	TATA-box	TATAAA	451	6	-	Helianthus annuus	core promoter element around -30 of transcription start
BnaA01NPF2.28	TATA-box	TATAAA	503	6	-	Helianthus annuus	core promoter element around -30 of transcription start
BnaA01NPF2.28	TATA-box	TATAAA	551	6	-	Helianthus annuus	core promoter element around -30 of transcription start
BnaA01NPF2.28	TATA-box	TATAAA	1559	6	-	Helianthus annuus	core promoter element around -30 of transcription start
BnaA01NPF2.28	TATA-box	TATAAA	1855	6	-	Helianthus annuus	core promoter element around -30 of transcription start
BnaA01NPF2.28	TATA-box	TATAAAA	450	7	-	Pisum sativum	core promoter element around -30 of transcription start
BnaA01NPF2.28	TATA-box	TATAAAA	1854	7	-	Pisum sativum	core promoter element around -30 of transcription start
BnaA01NPF2.28	TATA-box	TATAAAT	52	7	-	Brassica juncea	core promoter element around -30 of transcription start
BnaA01NPF2.28	TATA-box	TATAAATA	51	8	-	Daucus carota	core promoter element around -30 of transcription start
BnaA01NPF2.28	Unnamed__6	taTAAATATct	48	10	-	Zea mays
BnaA01NPF2.28	TATA-box	TATACA	1437	6	-	Helianthus annuus	core promoter element around -30 of transcription start
BnaA01NPF2.28	AT~TATA-box	TATATA	453	6	+	Arabidopsis thaliana
BnaA01NPF2.28	AT~TATA-box	TATATA	1561	6	-	Arabidopsis thaliana
BnaA01NPF2.28	AT~TATA-box	TATATA	1857	6	-	Arabidopsis thaliana
BnaA01NPF2.28	TATA-box	TATATA	453	6	+	Arabidopsis thaliana	core promoter element around -30 of transcription start
BnaA01NPF2.28	TATA-box	TATATA	1561	6	-	Arabidopsis thaliana	core promoter element around -30 of transcription start
BnaA01NPF2.28	TATA-box	TATATA	1857	6	-	Arabidopsis thaliana	core promoter element around -30 of transcription start
BnaA01NPF2.28	TATA-box	TATATAA	452	7	-	Arabidopsis thaliana	core promoter element around -30 of transcription start
BnaA01NPF2.28	TATA-box	TATATAA	1560	7	-	Arabidopsis thaliana	core promoter element around -30 of transcription start
BnaA01NPF2.28	TATA-box	TATATAA	1856	7	-	Arabidopsis thaliana	core promoter element around -30 of transcription start
BnaA01NPF2.28	AT~TATA-box	TATATAAA	451	8	-	Arabidopsis thaliana
BnaA01NPF2.28	AT~TATA-box	TATATAAA	1559	8	-	Arabidopsis thaliana
BnaA01NPF2.28	AT~TATA-box	TATATAAA	1855	8	-	Arabidopsis thaliana
BnaA01NPF2.28	TATA-box	taTATAAAg	1558	9	-	Lycopersicon esculentum	core promoter element around -30 of transcription start
BnaA01NPF2.28	TATA-box	TATATTTATATTT	49	12	+	Avena sativa	core promoter element around -30 of transcription start
BnaA01NPF2.28	TATA-box	TATTTAAA	140	8	-	Arabidopsis thaliana	core promoter element around -30 of transcription start
BnaA01NPF2.28	Myc	TCTCTTA	1085	7	+	Arabidopsis thaliana
BnaA01NPF2.28	Myc	TCTCTTA	1475	7	+	Arabidopsis thaliana
BnaA01NPF2.28	TCT-motif	TCTTAC	394	6	+	Arabidopsis thaliana	part of a light responsive element
BnaA01NPF2.28	TCT-motif	TCTTAC	1087	6	+	Arabidopsis thaliana	part of a light responsive element
BnaA01NPF2.28	W box	TTGACC	492	6	+	Arabidopsis thaliana
BnaA01NPF2.28	W box	TTGACC	1050	6	-	Arabidopsis thaliana
BnaA01NPF2.28	W box	TTGACC	1941	6	-	Arabidopsis thaliana
BnaA01NPF2.8	ARE	AAACCA	1218	6	-	Zea mays	cis-acting regulatory element essential for the anaerobic induction
BnaA01NPF2.8	AE-box	AGAAACAA	534	8	+	Arabidopsis thaliana	part of a module for light response
BnaA01NPF2.8	GA-motif	ATAGATAA	1345	8	+	Arabidopsis thaliana	part of a light responsive element
BnaA01NPF2.8	TATA-box	ATATAA	609	6	+	Brassica oleracea	core promoter element around -30 of transcription start
BnaA01NPF2.8	TATA-box	ATATAA	739	6	+	Brassica oleracea	core promoter element around -30 of transcription start
BnaA01NPF2.8	TATA-box	ATATAA	1053	6	+	Brassica oleracea	core promoter element around -30 of transcription start
BnaA01NPF2.8	TATA-box	ATATAA	1440	6	+	Brassica oleracea	core promoter element around -30 of transcription start
BnaA01NPF2.8	TATA-box	ATATAA	1882	6	+	Brassica oleracea	core promoter element around -30 of transcription start
BnaA01NPF2.8	TATA-box	ATATAT	607	6	+	Brassica napus	core promoter element around -30 of transcription start
BnaA01NPF2.8	TATA-box	ATATAT	886	6	+	Brassica napus	core promoter element around -30 of transcription start
BnaA01NPF2.8	TATA-box	ATATAT	888	6	+	Brassica napus	core promoter element around -30 of transcription start
BnaA01NPF2.8	TATA-box	ATATAT	890	6	+	Brassica napus	core promoter element around -30 of transcription start
BnaA01NPF2.8	TATA-box	ATATAT	892	6	+	Brassica napus	core promoter element around -30 of transcription start
BnaA01NPF2.8	TATA-box	ATATAT	894	6	+	Brassica napus	core promoter element around -30 of transcription start
BnaA01NPF2.8	TATA-box	ATATAT	896	6	+	Brassica napus	core promoter element around -30 of transcription start
BnaA01NPF2.8	TATA-box	ATATAT	898	6	+	Brassica napus	core promoter element around -30 of transcription start
BnaA01NPF2.8	TATA-box	ATATAT	900	6	+	Brassica napus	core promoter element around -30 of transcription start
BnaA01NPF2.8	TATA-box	ATATAT	902	6	+	Brassica napus	core promoter element around -30 of transcription start
BnaA01NPF2.8	TATA-box	ATATAT	904	6	+	Brassica napus	core promoter element around -30 of transcription start
BnaA01NPF2.8	TATA-box	ATATAT	906	6	+	Brassica napus	core promoter element around -30 of transcription start
BnaA01NPF2.8	TATA-box	ATATAT	908	6	+	Brassica napus	core promoter element around -30 of transcription start
BnaA01NPF2.8	TATA-box	ATATAT	1206	6	-	Brassica napus	core promoter element around -30 of transcription start
BnaA01NPF2.8	TATA-box	ATATAT	1315	6	-	Brassica napus	core promoter element around -30 of transcription start
BnaA01NPF2.8	TATA-box	ATATAT	1414	6	-	Brassica napus	core promoter element around -30 of transcription start
BnaA01NPF2.8	Box 4	ATTAAT	666	6	+	Petroselinum crispum	part of a conserved DNA module involved in light responsiveness
BnaA01NPF2.8	Box 4	ATTAAT	1037	6	-	Petroselinum crispum	part of a conserved DNA module involved in light responsiveness
BnaA01NPF2.8	Box 4	ATTAAT	1585	6	-	Petroselinum crispum	part of a conserved DNA module involved in light responsiveness
BnaA01NPF2.8	Box 4	ATTAAT	1762	6	-	Petroselinum crispum	part of a conserved DNA module involved in light responsiveness
BnaA01NPF2.8	TATA-box	ATTATA	89	6	+	Brassica napus	core promoter element around -30 of transcription start
BnaA01NPF2.8	TATA-box	ATTATA	1269	6	+	Brassica napus	core promoter element around -30 of transcription start
BnaA01NPF2.8	TATA-box	ATTATA	1437	6	+	Brassica napus	core promoter element around -30 of transcription start
BnaA01NPF2.8	TC-rich repeats	ATTCTCTAAC	1723	9	+	Nicotiana tabacum	cis-acting element involved in defense and stress responsiveness
BnaA01NPF2.8	ERE	ATTTTAAA	793	8	-	Nicotiana glutinos
BnaA01NPF2.8	CAAT-box	CAAAT	177	5	+	Pisum sativum	common cis-acting element in promoter and enhancer regions
BnaA01NPF2.8	CAAT-box	CAAAT	539	5	+	Pisum sativum	common cis-acting element in promoter and enhancer regions
BnaA01NPF2.8	CAAT-box	CAAAT	589	5	+	Pisum sativum	common cis-acting element in promoter and enhancer regions
BnaA01NPF2.8	CAAT-box	CAAAT	825	5	-	Pisum sativum	common cis-acting element in promoter and enhancer regions
BnaA01NPF2.8	CAAT-box	CAAAT	869	5	+	Pisum sativum	common cis-acting element in promoter and enhancer regions
BnaA01NPF2.8	CAAT-box	CAAAT	1034	5	+	Pisum sativum	common cis-acting element in promoter and enhancer regions
BnaA01NPF2.8	CAAT-box	CAAAT	1228	5	+	Pisum sativum	common cis-acting element in promoter and enhancer regions
BnaA01NPF2.8	CAAT-box	CAAAT	1294	5	+	Pisum sativum	common cis-acting element in promoter and enhancer regions
BnaA01NPF2.8	CAAT-box	CAAAT	1304	5	-	Pisum sativum	common cis-acting element in promoter and enhancer regions
BnaA01NPF2.8	CAAT-box	CAAAT	1411	5	+	Pisum sativum	common cis-acting element in promoter and enhancer regions
BnaA01NPF2.8	CAAT-box	CAAAT	1429	5	+	Pisum sativum	common cis-acting element in promoter and enhancer regions
BnaA01NPF2.8	CAAT-box	CAAAT	1600	5	-	Pisum sativum	common cis-acting element in promoter and enhancer regions
BnaA01NPF2.8	CAAT-box	CAAAT	1774	5	+	Pisum sativum	common cis-acting element in promoter and enhancer regions
BnaA01NPF2.8	MYB	CAACCA	1021	6	+	Arabidopsis thaliana
BnaA01NPF2.8	CAAT-box	CAAT	15	4	+	Nicotiana glutinosa
BnaA01NPF2.8	CAAT-box	CAAT	112	4	-	Nicotiana glutinosa
BnaA01NPF2.8	CAAT-box	CAAT	129	4	-	Nicotiana glutinosa
BnaA01NPF2.8	CAAT-box	CAAT	160	4	-	Nicotiana glutinosa
BnaA01NPF2.8	CAAT-box	CAAT	204	4	+	Nicotiana glutinosa
BnaA01NPF2.8	CAAT-box	CAAT	325	4	-	Nicotiana glutinosa
BnaA01NPF2.8	CAAT-box	CAAT	360	4	-	Nicotiana glutinosa
BnaA01NPF2.8	CAAT-box	CAAT	434	4	+	Nicotiana glutinosa
BnaA01NPF2.8	CAAT-box	CAAT	456	4	-	Nicotiana glutinosa
BnaA01NPF2.8	CAAT-box	CAAT	460	4	+	Nicotiana glutinosa
BnaA01NPF2.8	CAAT-box	CAAT	479	4	-	Nicotiana glutinosa
BnaA01NPF2.8	CAAT-box	CAAT	582	4	+	Nicotiana glutinosa
BnaA01NPF2.8	CAAT-box	CAAT	629	4	-	Nicotiana glutinosa
BnaA01NPF2.8	CAAT-box	CAAT	670	4	-	Nicotiana glutinosa
BnaA01NPF2.8	CAAT-box	CAAT	687	4	+	Nicotiana glutinosa
BnaA01NPF2.8	CAAT-box	CAAT	771	4	-	Nicotiana glutinosa
BnaA01NPF2.8	CAAT-box	CAAT	850	4	-	Nicotiana glutinosa
BnaA01NPF2.8	CAAT-box	CAAT	1186	4	+	Nicotiana glutinosa
BnaA01NPF2.8	CAAT-box	CAAT	1311	4	-	Nicotiana glutinosa
BnaA01NPF2.8	CAAT-box	CAAT	1375	4	+	Nicotiana glutinosa
BnaA01NPF2.8	CAAT-box	CAAT	1435	4	+	Nicotiana glutinosa
BnaA01NPF2.8	CAAT-box	CAAT	1484	4	+	Nicotiana glutinosa
BnaA01NPF2.8	CAAT-box	CAAT	1528	4	-	Nicotiana glutinosa
BnaA01NPF2.8	CAAT-box	CAAT	1541	4	-	Nicotiana glutinosa
BnaA01NPF2.8	CAAT-box	CAAT	1779	4	+	Nicotiana glutinosa
BnaA01NPF2.8	CAAT-box	CAAT	1992	4	-	Nicotiana glutinosa
BnaA01NPF2.8	WUN-motif	CAATTACAT	1779	9	+	Nicotiana glutinosa
BnaA01NPF2.8	G-box	CACGAC	1405	6	-	Zea mays	cis-acting regulatory element involved in light responsiveness
BnaA01NPF2.8	MYC	CATTTG	1429	6	-	Arabidopsis thaliana
BnaA01NPF2.8	MYC	CATTTG	1599	6	+	Arabidopsis thaliana
BnaA01NPF2.8	CAAT-box	CCAAT	283	5	-	Arabidopsis thaliana	common cis-acting element in promoter and enhancer regions
BnaA01NPF2.8	CAAT-box	CCAAT	445	5	-	Arabidopsis thaliana	common cis-acting element in promoter and enhancer regions
BnaA01NPF2.8	CAAT-box	CCAAT	516	5	-	Arabidopsis thaliana	common cis-acting element in promoter and enhancer regions
BnaA01NPF2.8	CAAT-box	CCAAT	1319	5	-	Arabidopsis thaliana	common cis-acting element in promoter and enhancer regions
BnaA01NPF2.8	CAAT-box	CCAAT	1605	5	-	Arabidopsis thaliana	common cis-acting element in promoter and enhancer regions
BnaA01NPF2.8	CAAT-box	CCAAT	1633	5	-	Arabidopsis thaliana	common cis-acting element in promoter and enhancer regions
BnaA01NPF2.8	TCA-element	CCATCTTTTT	569	9	+	Nicotiana tabacum	cis-acting element involved in salicylic acid responsiveness
BnaA01NPF2.8	TATA-box	ccTATAAAaa	799	9	-	Arabidopsis thaliana	core promoter element around -30 of transcription start
BnaA01NPF2.8	CGTCA-motif	CGTCA	68	5	-	Hordeum vulgare	cis-acting regulatory element involved in the MeJA-responsiveness
BnaA01NPF2.8	CGTCA-motif	CGTCA	1671	5	-	Hordeum vulgare	cis-acting regulatory element involved in the MeJA-responsiveness
BnaA01NPF2.8	Unnamed__4	CTCC	50	4	-	Petroselinum hortense
BnaA01NPF2.8	Unnamed__4	CTCC	63	4	+	Petroselinum hortense
BnaA01NPF2.8	Unnamed__4	CTCC	384	4	-	Petroselinum hortense
BnaA01NPF2.8	Unnamed__4	CTCC	725	4	+	Petroselinum hortense
BnaA01NPF2.8	Unnamed__4	CTCC	1636	4	-	Petroselinum hortense
BnaA01NPF2.8	Unnamed__4	CTCC	1875	4	+	Petroselinum hortense
BnaA01NPF2.8	Unnamed__4	CTCC	1878	4	+	Petroselinum hortense
BnaA01NPF2.8	Unnamed__4	CTCC	1937	4	-	Petroselinum hortense
BnaA01NPF2.8	AAGAA-motif	GAAAGAA	1839	7	-	Avena sativa
BnaA01NPF2.8	GT1-motif	GGTTAA	336	6	-	Arabidopsis thaliana	light responsive element
BnaA01NPF2.8	GT1-motif	GGTTAA	396	6	-	Arabidopsis thaliana	light responsive element
BnaA01NPF2.8	GT1-motif	GGTTAA	448	6	+	Arabidopsis thaliana	light responsive element
BnaA01NPF2.8	GT1-motif	GGTTAA	473	6	-	Arabidopsis thaliana	light responsive element
BnaA01NPF2.8	GT1-motif	GGTTAA	1223	6	-	Arabidopsis thaliana	light responsive element
BnaA01NPF2.8	GT1-motif	GGTTAAT	335	7	-	Avena sativa	light responsive element
BnaA01NPF2.8	HD-Zip 3	GTAAT(G/C)ATTAC	1975	10	-	Arabidopsis thaliana	protein binding site
BnaA01NPF2.8	TATA-box	TAAAGATT	1119	8	+	Arabidopsis thaliana	core promoter element around -30 of transcription start
BnaA01NPF2.8	MYB-like sequence	TAACCA	447	6	-	Arabidopsis thaliana
BnaA01NPF2.8	MYB-like sequence	TAACCA	474	6	+	Arabidopsis thaliana
BnaA01NPF2.8	MYB-like sequence	TAACCA	1224	6	+	Arabidopsis thaliana
BnaA01NPF2.8	MYB	TAACCA	447	6	-	Arabidopsis thaliana
BnaA01NPF2.8	MYB	TAACCA	474	6	+	Arabidopsis thaliana
BnaA01NPF2.8	MYB	TAACCA	1224	6	+	Arabidopsis thaliana
BnaA01NPF2.8	TATA-box	TACAAAA	1465	7	+	Oryza sativa	core promoter element around -30 of transcription start
BnaA01NPF2.8	TATA-box	TACAAAA	1616	7	-	Oryza sativa	core promoter element around -30 of transcription start
BnaA01NPF2.8	TATA-box	TACATAAA	636	8	-	Oryza sativa	core promoter element around -30 of transcription start
BnaA01NPF2.8	TATA-box	TATA	91	4	+	Arabidopsis thaliana	core promoter element around -30 of transcription start
BnaA01NPF2.8	TATA-box	TATA	126	4	+	Arabidopsis thaliana	core promoter element around -30 of transcription start
BnaA01NPF2.8	TATA-box	TATA	316	4	+	Arabidopsis thaliana	core promoter element around -30 of transcription start
BnaA01NPF2.8	TATA-box	TATA	500	4	+	Arabidopsis thaliana	core promoter element around -30 of transcription start
BnaA01NPF2.8	TATA-box	TATA	610	4	+	Arabidopsis thaliana	core promoter element around -30 of transcription start
BnaA01NPF2.8	TATA-box	TATA	740	4	+	Arabidopsis thaliana	core promoter element around -30 of transcription start
BnaA01NPF2.8	TATA-box	TATA	803	4	+	Arabidopsis thaliana	core promoter element around -30 of transcription start
BnaA01NPF2.8	TATA-box	TATA	909	4	+	Arabidopsis thaliana	core promoter element around -30 of transcription start
BnaA01NPF2.8	TATA-box	TATA	939	4	+	Arabidopsis thaliana	core promoter element around -30 of transcription start
BnaA01NPF2.8	TATA-box	TATA	973	4	+	Arabidopsis thaliana	core promoter element around -30 of transcription start
BnaA01NPF2.8	TATA-box	TATA	978	4	+	Arabidopsis thaliana	core promoter element around -30 of transcription start
BnaA01NPF2.8	TATA-box	TATA	1054	4	-	Arabidopsis thaliana	core promoter element around -30 of transcription start
BnaA01NPF2.8	TATA-box	TATA	1061	4	-	Arabidopsis thaliana	core promoter element around -30 of transcription start
BnaA01NPF2.8	TATA-box	TATA	1117	4	-	Arabidopsis thaliana	core promoter element around -30 of transcription start
BnaA01NPF2.8	TATA-box	TATA	1137	4	-	Arabidopsis thaliana	core promoter element around -30 of transcription start
BnaA01NPF2.8	TATA-box	TATA	1177	4	-	Arabidopsis thaliana	core promoter element around -30 of transcription start
BnaA01NPF2.8	TATA-box	TATA	1207	4	-	Arabidopsis thaliana	core promoter element around -30 of transcription start
BnaA01NPF2.8	TATA-box	TATA	1214	4	-	Arabidopsis thaliana	core promoter element around -30 of transcription start
BnaA01NPF2.8	TATA-box	TATA	1271	4	-	Arabidopsis thaliana	core promoter element around -30 of transcription start
BnaA01NPF2.8	TATA-box	TATA	1316	4	-	Arabidopsis thaliana	core promoter element around -30 of transcription start
BnaA01NPF2.8	TATA-box	TATA	1344	4	-	Arabidopsis thaliana	core promoter element around -30 of transcription start
BnaA01NPF2.8	TATA-box	TATA	1356	4	-	Arabidopsis thaliana	core promoter element around -30 of transcription start
BnaA01NPF2.8	TATA-box	TATA	1386	4	-	Arabidopsis thaliana	core promoter element around -30 of transcription start
BnaA01NPF2.8	TATA-box	TATA	1415	4	-	Arabidopsis thaliana	core promoter element around -30 of transcription start
BnaA01NPF2.8	TATA-box	TATA	1441	4	-	Arabidopsis thaliana	core promoter element around -30 of transcription start
BnaA01NPF2.8	TATA-box	TATA	1510	4	-	Arabidopsis thaliana	core promoter element around -30 of transcription start
BnaA01NPF2.8	TATA-box	TATA	1549	4	-	Arabidopsis thaliana	core promoter element around -30 of transcription start
BnaA01NPF2.8	TATA-box	TATA	1883	4	-	Arabidopsis thaliana	core promoter element around -30 of transcription start
BnaA01NPF2.8	TATA-box	TATAA	90	5	-	Arabidopsis thaliana	core promoter element around -30 of transcription start
BnaA01NPF2.8	TATA-box	TATAA	802	5	-	Arabidopsis thaliana	core promoter element around -30 of transcription start
BnaA01NPF2.8	TATA-box	TATAA	1060	5	-	Arabidopsis thaliana	core promoter element around -30 of transcription start
BnaA01NPF2.8	TATA-box	TATAA	1116	5	-	Arabidopsis thaliana	core promoter element around -30 of transcription start
BnaA01NPF2.8	TATA-box	TATAA	1213	5	-	Arabidopsis thaliana	core promoter element around -30 of transcription start
BnaA01NPF2.8	TATA-box	TATAA	1270	5	-	Arabidopsis thaliana	core promoter element around -30 of transcription start
BnaA01NPF2.8	TATA-box	TATAA	1548	5	-	Arabidopsis thaliana	core promoter element around -30 of transcription start
BnaA01NPF2.8	TATA-box	TATAAA	496	6	-	Helianthus annuus	core promoter element around -30 of transcription start
BnaA01NPF2.8	TATA-box	TATAAA	801	6	-	Helianthus annuus	core promoter element around -30 of transcription start
BnaA01NPF2.8	TATA-box	TATAAA	969	6	-	Helianthus annuus	core promoter element around -30 of transcription start
BnaA01NPF2.8	TATA-box	TATAAA	1059	6	-	Helianthus annuus	core promoter element around -30 of transcription start
BnaA01NPF2.8	TATA-box	TATAAA	1115	6	-	Helianthus annuus	core promoter element around -30 of transcription start
BnaA01NPF2.8	TATA-box	TATAAA	1212	6	-	Helianthus annuus	core promoter element around -30 of transcription start
BnaA01NPF2.8	TATA-box	TATAAAA	800	7	-	Pisum sativum	core promoter element around -30 of transcription start
BnaA01NPF2.8	TATA-box	TATAAAA	968	7	-	Pisum sativum	core promoter element around -30 of transcription start
BnaA01NPF2.8	TATA-box	TATAAAA	1211	7	-	Pisum sativum	core promoter element around -30 of transcription start
BnaA01NPF2.8	TATA	TATAAAAT	799	8	-	Arabidopsis thaliana
BnaA01NPF2.8	TATA	TATAAAAT	1210	8	-	Arabidopsis thaliana
BnaA01NPF2.8	TATA-box	TATAAAT	1058	7	-	Brassica juncea	core promoter element around -30 of transcription start
BnaA01NPF2.8	TATA-box	TATAAAT	1114	7	-	Brassica juncea	core promoter element around -30 of transcription start
BnaA01NPF2.8	Unnamed__6	taTAAATATct	871	10	+	Zea mays
BnaA01NPF2.8	Unnamed__6	taTAAATATct	884	10	-	Zea mays
BnaA01NPF2.8	TATA-box	TATACA	937	6	-	Helianthus annuus	core promoter element around -30 of transcription start
BnaA01NPF2.8	TATA-box	TATATA	498	6	+	Arabidopsis thaliana	core promoter element around -30 of transcription start
BnaA01NPF2.8	TATA-box	TATATA	608	6	+	Arabidopsis thaliana	core promoter element around -30 of transcription start
BnaA01NPF2.8	TATA-box	TATATA	887	6	+	Arabidopsis thaliana	core promoter element around -30 of transcription start
BnaA01NPF2.8	TATA-box	TATATA	889	6	+	Arabidopsis thaliana	core promoter element around -30 of transcription start
BnaA01NPF2.8	TATA-box	TATATA	891	6	+	Arabidopsis thaliana	core promoter element around -30 of transcription start
BnaA01NPF2.8	TATA-box	TATATA	893	6	+	Arabidopsis thaliana	core promoter element around -30 of transcription start
BnaA01NPF2.8	TATA-box	TATATA	895	6	+	Arabidopsis thaliana	core promoter element around -30 of transcription start
BnaA01NPF2.8	TATA-box	TATATA	897	6	+	Arabidopsis thaliana	core promoter element around -30 of transcription start
BnaA01NPF2.8	TATA-box	TATATA	899	6	+	Arabidopsis thaliana	core promoter element around -30 of transcription start
BnaA01NPF2.8	TATA-box	TATATA	901	6	+	Arabidopsis thaliana	core promoter element around -30 of transcription start
BnaA01NPF2.8	TATA-box	TATATA	903	6	+	Arabidopsis thaliana	core promoter element around -30 of transcription start
BnaA01NPF2.8	TATA-box	TATATA	905	6	+	Arabidopsis thaliana	core promoter element around -30 of transcription start
BnaA01NPF2.8	TATA-box	TATATA	907	6	+	Arabidopsis thaliana	core promoter element around -30 of transcription start
BnaA01NPF2.8	TATA-box	TATATA	971	6	+	Arabidopsis thaliana	core promoter element around -30 of transcription start
BnaA01NPF2.8	TATA-box	TATATA	1439	6	-	Arabidopsis thaliana	core promoter element around -30 of transcription start
BnaA01NPF2.8	AT~TATA-box	TATATA	498	6	+	Arabidopsis thaliana
BnaA01NPF2.8	AT~TATA-box	TATATA	608	6	+	Arabidopsis thaliana
BnaA01NPF2.8	AT~TATA-box	TATATA	887	6	+	Arabidopsis thaliana
BnaA01NPF2.8	AT~TATA-box	TATATA	889	6	+	Arabidopsis thaliana
BnaA01NPF2.8	AT~TATA-box	TATATA	891	6	+	Arabidopsis thaliana
BnaA01NPF2.8	AT~TATA-box	TATATA	893	6	+	Arabidopsis thaliana
BnaA01NPF2.8	AT~TATA-box	TATATA	895	6	+	Arabidopsis thaliana
BnaA01NPF2.8	AT~TATA-box	TATATA	897	6	+	Arabidopsis thaliana
BnaA01NPF2.8	AT~TATA-box	TATATA	899	6	+	Arabidopsis thaliana
BnaA01NPF2.8	AT~TATA-box	TATATA	901	6	+	Arabidopsis thaliana
BnaA01NPF2.8	AT~TATA-box	TATATA	903	6	+	Arabidopsis thaliana
BnaA01NPF2.8	AT~TATA-box	TATATA	905	6	+	Arabidopsis thaliana
BnaA01NPF2.8	AT~TATA-box	TATATA	907	6	+	Arabidopsis thaliana
BnaA01NPF2.8	AT~TATA-box	TATATA	971	6	+	Arabidopsis thaliana
BnaA01NPF2.8	AT~TATA-box	TATATA	1439	6	-	Arabidopsis thaliana
BnaA01NPF2.8	TATA-box	TATATAA	497	7	-	Arabidopsis thaliana	core promoter element around -30 of transcription start
BnaA01NPF2.8	TATA-box	TATATAA	970	7	-	Arabidopsis thaliana	core promoter element around -30 of transcription start
BnaA01NPF2.8	TATA-box	TATATAA	1438	7	-	Arabidopsis thaliana	core promoter element around -30 of transcription start
BnaA01NPF2.8	AT~TATA-box	TATATAAA	496	8	-	Arabidopsis thaliana
BnaA01NPF2.8	AT~TATA-box	TATATAAA	969	8	-	Arabidopsis thaliana
BnaA01NPF2.8	TATA-box	taTATAAAg	495	9	-	Lycopersicon esculentum	core promoter element around -30 of transcription start
BnaA01NPF2.8	TATA-box	taTATAAAtc	885	9	-	Arabidopsis thaliana	core promoter element around -30 of transcription start
BnaA01NPF2.8	TATA-box	taTATAAAtc	967	9	-	Arabidopsis thaliana	core promoter element around -30 of transcription start
BnaA01NPF2.8	TATA-box	TATTTAAA	858	8	-	Arabidopsis thaliana	core promoter element around -30 of transcription start
BnaA01NPF2.8	TCCC-motif	TCTCCCT	1935	7	-	Spinacia oleracea	part of a light responsive element
BnaA01NPF2.8	TCT-motif	TCTTAC	1397	6	-	Arabidopsis thaliana	part of a light responsive element
BnaA01NPF2.8	TGACG-motif	TGACG	68	5	+	Hordeum vulgare	cis-acting regulatory element involved in the MeJA-responsiveness
BnaA01NPF2.8	TGACG-motif	TGACG	1671	5	+	Hordeum vulgare	cis-acting regulatory element involved in the MeJA-responsiveness
BnaA01NPF2.8	as-1	TGACG	68	5	+	Arabidopsis thaliana
BnaA01NPF2.8	as-1	TGACG	1671	5	+	Arabidopsis thaliana
BnaA01NPF2.8	TGA-box	TGACGTAA	68	8	+	Glycine max	part of an auxin-responsive element
BnaA01NPF2.8	GATA-box	TTACCACAGAAACTC	1698	14	+	Daucus carota	responsive element to auxin-free medium
BnaA01NPF4.12	ARE	AAACCA	511	6	+	Zea mays	cis-acting regulatory element essential for the anaerobic induction
BnaA01NPF4.12	ARE	AAACCA	1913	6	+	Zea mays	cis-acting regulatory element essential for the anaerobic induction
BnaA01NPF4.12	MRE	AACCTAA	1007	7	-	Petroselinum crispum	MYB binding site involved in light responsiveness
BnaA01NPF4.12	MRE	AACCTAA	1286	7	-	Petroselinum crispum	MYB binding site involved in light responsiveness
BnaA01NPF4.12	Unnamed__2	AACCTAACCT	1283	9	-	Petroselinum hortense
BnaA01NPF4.12	TGA-element	AACGAC	1829	6	+	Brassica oleracea	auxin-responsive element
BnaA01NPF4.12	ABRE	ACGTG	68	5	-	Arabidopsis thaliana	cis-acting element involved in the abscisic acid responsiveness
BnaA01NPF4.12	ABRE	ACGTG	165	5	-	Arabidopsis thaliana	cis-acting element involved in the abscisic acid responsiveness
BnaA01NPF4.12	ABRE	ACGTG	1611	5	+	Arabidopsis thaliana	cis-acting element involved in the abscisic acid responsiveness
BnaA01NPF4.12	TATA-box	ATATAA	1337	6	+	Brassica oleracea	core promoter element around -30 of transcription start
BnaA01NPF4.12	TATA-box	ATATAT	100	6	+	Brassica napus	core promoter element around -30 of transcription start
BnaA01NPF4.12	Box 4	ATTAAT	1621	6	-	Petroselinum crispum	part of a conserved DNA module involved in light responsiveness
BnaA01NPF4.12	TATA-box	ATTATA	281	6	+	Brassica napus	core promoter element around -30 of transcription start
BnaA01NPF4.12	TATA-box	ATTATA	812	6	+	Brassica napus	core promoter element around -30 of transcription start
BnaA01NPF4.12	TATA-box	ATTATA	1334	6	+	Brassica napus	core promoter element around -30 of transcription start
BnaA01NPF4.12	TATA-box	ATTATA	1344	6	+	Brassica napus	core promoter element around -30 of transcription start
BnaA01NPF4.12	CAAT-box	CAAAT	89	5	+	Pisum sativum	common cis-acting element in promoter and enhancer regions
BnaA01NPF4.12	CAAT-box	CAAAT	134	5	+	Pisum sativum	common cis-acting element in promoter and enhancer regions
BnaA01NPF4.12	CAAT-box	CAAAT	144	5	-	Pisum sativum	common cis-acting element in promoter and enhancer regions
BnaA01NPF4.12	CAAT-box	CAAAT	256	5	-	Pisum sativum	common cis-acting element in promoter and enhancer regions
BnaA01NPF4.12	CAAT-box	CAAAT	278	5	+	Pisum sativum	common cis-acting element in promoter and enhancer regions
BnaA01NPF4.12	CAAT-box	CAAAT	980	5	-	Pisum sativum	common cis-acting element in promoter and enhancer regions
BnaA01NPF4.12	CAAT-box	CAAAT	1039	5	-	Pisum sativum	common cis-acting element in promoter and enhancer regions
BnaA01NPF4.12	CAAT-box	CAAAT	1092	5	-	Pisum sativum	common cis-acting element in promoter and enhancer regions
BnaA01NPF4.12	CAAT-box	CAAAT	1162	5	-	Pisum sativum	common cis-acting element in promoter and enhancer regions
BnaA01NPF4.12	CAAT-box	CAAAT	1222	5	-	Pisum sativum	common cis-acting element in promoter and enhancer regions
BnaA01NPF4.12	CAAT-box	CAAAT	1243	5	-	Pisum sativum	common cis-acting element in promoter and enhancer regions
BnaA01NPF4.12	CAAT-box	CAAAT	1389	5	-	Pisum sativum	common cis-acting element in promoter and enhancer regions
BnaA01NPF4.12	CAAT-box	CAAAT	1637	5	+	Pisum sativum	common cis-acting element in promoter and enhancer regions
BnaA01NPF4.12	CAAT-box	CAAAT	1773	5	+	Pisum sativum	common cis-acting element in promoter and enhancer regions
BnaA01NPF4.12	CAAT-box	CAAAT	1776	5	-	Pisum sativum	common cis-acting element in promoter and enhancer regions
BnaA01NPF4.12	CAAT-box	CAAAT	1784	5	-	Pisum sativum	common cis-acting element in promoter and enhancer regions
BnaA01NPF4.12	CAAT-box	CAAAT	1889	5	-	Pisum sativum	common cis-acting element in promoter and enhancer regions
BnaA01NPF4.12	CAAT-box	CAAAT	1990	5	-	Pisum sativum	common cis-acting element in promoter and enhancer regions
BnaA01NPF4.12	Myb	CAACTG	127	6	+	Arabidopsis thaliana
BnaA01NPF4.12	MBS	CAACTG	127	6	+	Arabidopsis thaliana	MYB binding site involved in drought-inducibility
BnaA01NPF4.12	CAAT-box	CAAT	362	4	+	Nicotiana glutinosa
BnaA01NPF4.12	CAAT-box	CAAT	429	4	-	Nicotiana glutinosa
BnaA01NPF4.12	CAAT-box	CAAT	482	4	+	Nicotiana glutinosa
BnaA01NPF4.12	CAAT-box	CAAT	554	4	-	Nicotiana glutinosa
BnaA01NPF4.12	CAAT-box	CAAT	605	4	+	Nicotiana glutinosa
BnaA01NPF4.12	CAAT-box	CAAT	632	4	+	Nicotiana glutinosa
BnaA01NPF4.12	CAAT-box	CAAT	658	4	-	Nicotiana glutinosa
BnaA01NPF4.12	CAAT-box	CAAT	670	4	-	Nicotiana glutinosa
BnaA01NPF4.12	CAAT-box	CAAT	688	4	-	Nicotiana glutinosa
BnaA01NPF4.12	CAAT-box	CAAT	845	4	+	Nicotiana glutinosa
BnaA01NPF4.12	CAAT-box	CAAT	891	4	-	Nicotiana glutinosa
BnaA01NPF4.12	CAAT-box	CAAT	903	4	-	Nicotiana glutinosa
BnaA01NPF4.12	CAAT-box	CAAT	928	4	+	Nicotiana glutinosa
BnaA01NPF4.12	CAAT-box	CAAT	1127	4	+	Nicotiana glutinosa
BnaA01NPF4.12	CAAT-box	CAAT	1303	4	-	Nicotiana glutinosa
BnaA01NPF4.12	CAAT-box	CAAT	1371	4	-	Nicotiana glutinosa
BnaA01NPF4.12	CAAT-box	CAAT	1603	4	-	Nicotiana glutinosa
BnaA01NPF4.12	CAAT-box	CAAT	1625	4	-	Nicotiana glutinosa
BnaA01NPF4.12	CAAT-box	CAAT	1640	4	-	Nicotiana glutinosa
BnaA01NPF4.12	CAAT-box	CAAT	1719	4	-	Nicotiana glutinosa
BnaA01NPF4.12	CAAT-box	CAAT	1747	4	+	Nicotiana glutinosa
BnaA01NPF4.12	CAAT-box	CAAT	1866	4	-	Nicotiana glutinosa
BnaA01NPF4.12	CAAT-box	CAAT	1876	4	+	Nicotiana glutinosa
BnaA01NPF4.12	CAAT-box	CAAT	1917	4	+	Nicotiana glutinosa
BnaA01NPF4.12	CAAT-box	CAAT	1978	4	-	Nicotiana glutinosa
BnaA01NPF4.12	ABRE4	CACGTA	68	6	+	Zea mays
BnaA01NPF4.12	ABRE4	CACGTA	1610	6	-	Zea mays
BnaA01NPF4.12	G-box	CACGTC	165	6	+	Zea mays	cis-acting regulatory element involved in light responsiveness
BnaA01NPF4.12	MYC	CATTTG	134	6	-	Arabidopsis thaliana
BnaA01NPF4.12	MYC	CATTTG	1783	6	+	Arabidopsis thaliana
BnaA01NPF4.12	CAAT-box	CCAAT	481	5	+	Arabidopsis thaliana	common cis-acting element in promoter and enhancer regions
BnaA01NPF4.12	CAAT-box	CCAAT	1126	5	+	Arabidopsis thaliana	common cis-acting element in promoter and enhancer regions
BnaA01NPF4.12	CAAT-box	CCAAT	1875	5	+	Arabidopsis thaliana	common cis-acting element in promoter and enhancer regions
BnaA01NPF4.12	CAAT-box	CCAAT	1916	5	+	Arabidopsis thaliana	common cis-acting element in promoter and enhancer regions
BnaA01NPF4.12	WRE3	CCACCT	1046	6	-	Pisum sativum
BnaA01NPF4.12	LTR	CCGAAA	119	6	+	Hordeum vulgare	cis-acting element involved in low-temperature responsiveness
BnaA01NPF4.12	TATA-box	ccTATAAAaa	1895	9	+	Arabidopsis thaliana	core promoter element around -30 of transcription start
BnaA01NPF4.12	CGTCA-motif	CGTCA	1095	5	-	Hordeum vulgare	cis-acting regulatory element involved in the MeJA-responsiveness
BnaA01NPF4.12	Unnamed__1	CGTGG	164	5	-	Zea mays
BnaA01NPF4.12	Unnamed__4	CTCC	479	4	+	Petroselinum hortense
BnaA01NPF4.12	Unnamed__4	CTCC	563	4	-	Petroselinum hortense
BnaA01NPF4.12	Unnamed__4	CTCC	566	4	-	Petroselinum hortense
BnaA01NPF4.12	Unnamed__4	CTCC	1308	4	-	Petroselinum hortense
BnaA01NPF4.12	Unnamed__4	CTCC	1475	4	-	Petroselinum hortense
BnaA01NPF4.12	Unnamed__4	CTCC	1840	4	+	Petroselinum hortense
BnaA01NPF4.12	AAGAA-motif	GAAAGAA	804	7	+	Avena sativa
BnaA01NPF4.12	AAGAA-motif	gGTAAAGAAA	1551	9	+	Avena sativa
BnaA01NPF4.12	GT1-motif	GGTTAA	193	6	+	Arabidopsis thaliana	light responsive element
BnaA01NPF4.12	MYB-like sequence	TAACCA	433	6	-	Arabidopsis thaliana
BnaA01NPF4.12	MYB	TAACCA	433	6	-	Arabidopsis thaliana
BnaA01NPF4.12	Myb	TAACTG	196	6	+	Arabidopsis thaliana
BnaA01NPF4.12	WUN-motif	TAATTACTC	710	9	+	Nicotiana glutinosa
BnaA01NPF4.12	TATA-box	TACAAAA	838	7	-	Oryza sativa	core promoter element around -30 of transcription start
BnaA01NPF4.12	TATA-box	TACATAAA	335	8	-	Oryza sativa	core promoter element around -30 of transcription start
BnaA01NPF4.12	ABRE	TACGGTC	1072	7	-	Arabidopsis thaliana	cis-acting element involved in the abscisic acid responsiveness
BnaA01NPF4.12	ABRE3a	TACGTG	68	6	-	Zea mays
BnaA01NPF4.12	ABRE3a	TACGTG	1610	6	+	Zea mays
BnaA01NPF4.12	G-box	TACGTG	68	6	-	Arabidopsis thaliana	cis-acting regulatory element involved in light responsiveness
BnaA01NPF4.12	G-box	TACGTG	1610	6	+	Arabidopsis thaliana	cis-acting regulatory element involved in light responsiveness
BnaA01NPF4.12	TATA-box	TATA	50	4	+	Arabidopsis thaliana	core promoter element around -30 of transcription start
BnaA01NPF4.12	TATA-box	TATA	103	4	+	Arabidopsis thaliana	core promoter element around -30 of transcription start
BnaA01NPF4.12	TATA-box	TATA	110	4	+	Arabidopsis thaliana	core promoter element around -30 of transcription start
BnaA01NPF4.12	TATA-box	TATA	265	4	+	Arabidopsis thaliana	core promoter element around -30 of transcription start
BnaA01NPF4.12	TATA-box	TATA	283	4	+	Arabidopsis thaliana	core promoter element around -30 of transcription start
BnaA01NPF4.12	TATA-box	TATA	350	4	+	Arabidopsis thaliana	core promoter element around -30 of transcription start
BnaA01NPF4.12	TATA-box	TATA	496	4	+	Arabidopsis thaliana	core promoter element around -30 of transcription start
BnaA01NPF4.12	TATA-box	TATA	675	4	+	Arabidopsis thaliana	core promoter element around -30 of transcription start
BnaA01NPF4.12	TATA-box	TATA	789	4	+	Arabidopsis thaliana	core promoter element around -30 of transcription start
BnaA01NPF4.12	TATA-box	TATA	794	4	+	Arabidopsis thaliana	core promoter element around -30 of transcription start
BnaA01NPF4.12	TATA-box	TATA	814	4	+	Arabidopsis thaliana	core promoter element around -30 of transcription start
BnaA01NPF4.12	TATA-box	TATA	819	4	+	Arabidopsis thaliana	core promoter element around -30 of transcription start
BnaA01NPF4.12	TATA-box	TATA	833	4	+	Arabidopsis thaliana	core promoter element around -30 of transcription start
BnaA01NPF4.12	TATA-box	TATA	946	4	+	Arabidopsis thaliana	core promoter element around -30 of transcription start
BnaA01NPF4.12	TATA-box	TATA	955	4	+	Arabidopsis thaliana	core promoter element around -30 of transcription start
BnaA01NPF4.12	TATA-box	TATA	974	4	+	Arabidopsis thaliana	core promoter element around -30 of transcription start
BnaA01NPF4.12	TATA-box	TATA	996	4	+	Arabidopsis thaliana	core promoter element around -30 of transcription start
BnaA01NPF4.12	TATA-box	TATA	1132	4	-	Arabidopsis thaliana	core promoter element around -30 of transcription start
BnaA01NPF4.12	TATA-box	TATA	1137	4	-	Arabidopsis thaliana	core promoter element around -30 of transcription start
BnaA01NPF4.12	TATA-box	TATA	1171	4	-	Arabidopsis thaliana	core promoter element around -30 of transcription start
BnaA01NPF4.12	TATA-box	TATA	1178	4	-	Arabidopsis thaliana	core promoter element around -30 of transcription start
BnaA01NPF4.12	TATA-box	TATA	1338	4	-	Arabidopsis thaliana	core promoter element around -30 of transcription start
BnaA01NPF4.12	TATA-box	TATA	1348	4	-	Arabidopsis thaliana	core promoter element around -30 of transcription start
BnaA01NPF4.12	TATA-box	TATA	1386	4	-	Arabidopsis thaliana	core promoter element around -30 of transcription start
BnaA01NPF4.12	TATA-box	TATA	1553	4	-	Arabidopsis thaliana	core promoter element around -30 of transcription start
BnaA01NPF4.12	TATA-box	TATA	1570	4	-	Arabidopsis thaliana	core promoter element around -30 of transcription start
BnaA01NPF4.12	TATA-box	TATA	1808	4	-	Arabidopsis thaliana	core promoter element around -30 of transcription start
BnaA01NPF4.12	TATA-box	TATA	1861	4	-	Arabidopsis thaliana	core promoter element around -30 of transcription start
BnaA01NPF4.12	TATA-box	TATA	1886	4	-	Arabidopsis thaliana	core promoter element around -30 of transcription start
BnaA01NPF4.12	TATA-box	TATAA	109	5	-	Arabidopsis thaliana	core promoter element around -30 of transcription start
BnaA01NPF4.12	TATA-box	TATAA	282	5	-	Arabidopsis thaliana	core promoter element around -30 of transcription start
BnaA01NPF4.12	TATA-box	TATAA	495	5	-	Arabidopsis thaliana	core promoter element around -30 of transcription start
BnaA01NPF4.12	TATA-box	TATAA	674	5	-	Arabidopsis thaliana	core promoter element around -30 of transcription start
BnaA01NPF4.12	TATA-box	TATAA	813	5	-	Arabidopsis thaliana	core promoter element around -30 of transcription start
BnaA01NPF4.12	TATA-box	TATAA	832	5	-	Arabidopsis thaliana	core promoter element around -30 of transcription start
BnaA01NPF4.12	TATA-box	TATAA	995	5	-	Arabidopsis thaliana	core promoter element around -30 of transcription start
BnaA01NPF4.12	TATA-box	TATAA	1131	5	-	Arabidopsis thaliana	core promoter element around -30 of transcription start
BnaA01NPF4.12	TATA-box	TATAA	1170	5	-	Arabidopsis thaliana	core promoter element around -30 of transcription start
BnaA01NPF4.12	TATA-box	TATAA	1385	5	-	Arabidopsis thaliana	core promoter element around -30 of transcription start
BnaA01NPF4.12	TATA-box	TATAA	1807	5	-	Arabidopsis thaliana	core promoter element around -30 of transcription start
BnaA01NPF4.12	TATA-box	TATAA	1860	5	-	Arabidopsis thaliana	core promoter element around -30 of transcription start
BnaA01NPF4.12	TATA-box	TATAA	1885	5	-	Arabidopsis thaliana	core promoter element around -30 of transcription start
BnaA01NPF4.12	TATA-box	TATAAA	108	6	-	Helianthus annuus	core promoter element around -30 of transcription start
BnaA01NPF4.12	TATA-box	TATAAA	494	6	-	Helianthus annuus	core promoter element around -30 of transcription start
BnaA01NPF4.12	TATA-box	TATAAA	994	6	-	Helianthus annuus	core promoter element around -30 of transcription start
BnaA01NPF4.12	TATA-box	TATAAA	1130	6	-	Helianthus annuus	core promoter element around -30 of transcription start
BnaA01NPF4.12	TATA-box	TATAAA	1169	6	-	Helianthus annuus	core promoter element around -30 of transcription start
BnaA01NPF4.12	TATA-box	TATAAA	1384	6	-	Helianthus annuus	core promoter element around -30 of transcription start
BnaA01NPF4.12	TATA-box	TATAAA	1806	6	-	Helianthus annuus	core promoter element around -30 of transcription start
BnaA01NPF4.12	TATA-box	TATAAA	1884	6	-	Helianthus annuus	core promoter element around -30 of transcription start
BnaA01NPF4.12	TATA-box	TATAAAA	493	7	-	Pisum sativum	core promoter element around -30 of transcription start
BnaA01NPF4.12	TATA-box	TATAAAA	1805	7	-	Pisum sativum	core promoter element around -30 of transcription start
BnaA01NPF4.12	TATA-box	TATAAAT	1129	7	-	Brassica juncea	core promoter element around -30 of transcription start
BnaA01NPF4.12	TATA-box	TATAAAT	1883	7	-	Brassica juncea	core promoter element around -30 of transcription start
BnaA01NPF4.12	TATA-box	TATAAGAA	829	8	-	Zea mays	core promoter element around -30 of transcription start
BnaA01NPF4.12	TATA-box	TATACA	263	6	-	Helianthus annuus	core promoter element around -30 of transcription start
BnaA01NPF4.12	TATA-box	TATACA	1568	6	-	Helianthus annuus	core promoter element around -30 of transcription start
BnaA01NPF4.12	TATA-box	TATATA	101	6	+	Arabidopsis thaliana	core promoter element around -30 of transcription start
BnaA01NPF4.12	TATA-box	TATATA	1336	6	-	Arabidopsis thaliana	core promoter element around -30 of transcription start
BnaA01NPF4.12	TATA-box	TATATA	1346	6	-	Arabidopsis thaliana	core promoter element around -30 of transcription start
BnaA01NPF4.12	AT~TATA-box	TATATA	101	6	+	Arabidopsis thaliana
BnaA01NPF4.12	AT~TATA-box	TATATA	1336	6	-	Arabidopsis thaliana
BnaA01NPF4.12	AT~TATA-box	TATATA	1346	6	-	Arabidopsis thaliana
BnaA01NPF4.12	TATA-box	TATATAA	1335	7	-	Arabidopsis thaliana	core promoter element around -30 of transcription start
BnaA01NPF4.12	TATA-box	TATATAA	1345	7	-	Arabidopsis thaliana	core promoter element around -30 of transcription start
BnaA01NPF4.12	TATC-box	TATCCCA	152	7	-	Oryza sativa	cis-acting element involved in gibberellin-responsiveness
BnaA01NPF4.12	TATA-box	TATTTAAA	663	8	+	Arabidopsis thaliana	core promoter element around -30 of transcription start
BnaA01NPF4.12	TCA	TCATCTTCAT	641	9	+	Pisum sativum
BnaA01NPF4.12	TCA	TCATCTTCAT	769	9	-	Pisum sativum
BnaA01NPF4.12	TGACG-motif	TGACG	1095	5	+	Hordeum vulgare	cis-acting regulatory element involved in the MeJA-responsiveness
BnaA01NPF4.12	as-1	TGACG	1095	5	+	Arabidopsis thaliana
BnaA01NPF4.12	WUN-motif	TTATTACAT	338	9	-	Nicotiana glutinosa
BnaA01NPF6.13	ARE	AAACCA	1409	6	+	Zea mays	cis-acting regulatory element essential for the anaerobic induction
BnaA01NPF6.13	ARE	AAACCA	1510	6	-	Zea mays	cis-acting regulatory element essential for the anaerobic induction
BnaA01NPF6.13	ARE	AAACCA	1957	6	+	Zea mays	cis-acting regulatory element essential for the anaerobic induction
BnaA01NPF6.13	TGA-element	AACGAC	1122	6	-	Brassica oleracea	auxin-responsive element
BnaA01NPF6.13	STRE	AGGGG	724	5	+	Arabidopsis thaliana
BnaA01NPF6.13	STRE	AGGGG	1570	5	-	Arabidopsis thaliana
BnaA01NPF6.13	STRE	AGGGG	1622	5	+	Arabidopsis thaliana
BnaA01NPF6.13	TATA-box	ATATAA	298	6	+	Brassica oleracea	core promoter element around -30 of transcription start
BnaA01NPF6.13	TATA-box	ATATAA	367	6	+	Brassica oleracea	core promoter element around -30 of transcription start
BnaA01NPF6.13	TATA-box	ATATAA	468	6	+	Brassica oleracea	core promoter element around -30 of transcription start
BnaA01NPF6.13	TATA-box	ATATAA	1595	6	+	Brassica oleracea	core promoter element around -30 of transcription start
BnaA01NPF6.13	TATA-box	ATATAT	232	6	+	Brassica napus	core promoter element around -30 of transcription start
BnaA01NPF6.13	Box 4	ATTAAT	79	6	+	Petroselinum crispum	part of a conserved DNA module involved in light responsiveness
BnaA01NPF6.13	Box 4	ATTAAT	115	6	+	Petroselinum crispum	part of a conserved DNA module involved in light responsiveness
BnaA01NPF6.13	TATA-box	ATTATA	538	6	+	Brassica napus	core promoter element around -30 of transcription start
BnaA01NPF6.13	ERE	ATTTTAAA	144	8	-	Nicotiana glutinos
BnaA01NPF6.13	CAAT-box	CAAAT	45	5	+	Pisum sativum	common cis-acting element in promoter and enhancer regions
BnaA01NPF6.13	CAAT-box	CAAAT	529	5	+	Pisum sativum	common cis-acting element in promoter and enhancer regions
BnaA01NPF6.13	CAAT-box	CAAAT	532	5	-	Pisum sativum	common cis-acting element in promoter and enhancer regions
BnaA01NPF6.13	CAAT-box	CAAAT	954	5	+	Pisum sativum	common cis-acting element in promoter and enhancer regions
BnaA01NPF6.13	CAAT-box	CAAAT	1061	5	-	Pisum sativum	common cis-acting element in promoter and enhancer regions
BnaA01NPF6.13	CAAT-box	CAAAT	1306	5	-	Pisum sativum	common cis-acting element in promoter and enhancer regions
BnaA01NPF6.13	CAAT-box	CAAAT	1330	5	+	Pisum sativum	common cis-acting element in promoter and enhancer regions
BnaA01NPF6.13	CAAT-box	CAAAT	1414	5	-	Pisum sativum	common cis-acting element in promoter and enhancer regions
BnaA01NPF6.13	CAAT-box	CAAAT	1480	5	-	Pisum sativum	common cis-acting element in promoter and enhancer regions
BnaA01NPF6.13	CAAT-box	CAAAT	1507	5	-	Pisum sativum	common cis-acting element in promoter and enhancer regions
BnaA01NPF6.13	CAAT-box	CAAAT	1681	5	+	Pisum sativum	common cis-acting element in promoter and enhancer regions
BnaA01NPF6.13	MYB	CAACAG	1715	6	-	Arabidopsis thaliana
BnaA01NPF6.13	Myb-binding site	CAACAG	1715	6	-	Nicotiana tabacum
BnaA01NPF6.13	MYB	CAACCA	1579	6	+	Arabidopsis thaliana
BnaA01NPF6.13	MYB	CAACCA	1664	6	+	Arabidopsis thaliana
BnaA01NPF6.13	CARE	CAACTCAC	222	8	-	Oryza sativa
BnaA01NPF6.13	Myb	CAACTG	1013	6	-	Arabidopsis thaliana
BnaA01NPF6.13	MBS	CAACTG	1013	6	-	Arabidopsis thaliana	MYB binding site involved in drought-inducibility
BnaA01NPF6.13	CAAT-box	CAAT	121	4	+	Nicotiana glutinosa
BnaA01NPF6.13	CAAT-box	CAAT	211	4	+	Nicotiana glutinosa
BnaA01NPF6.13	CAAT-box	CAAT	240	4	+	Nicotiana glutinosa
BnaA01NPF6.13	CAAT-box	CAAT	382	4	+	Nicotiana glutinosa
BnaA01NPF6.13	CAAT-box	CAAT	826	4	-	Nicotiana glutinosa
BnaA01NPF6.13	CAAT-box	CAAT	863	4	-	Nicotiana glutinosa
BnaA01NPF6.13	CAAT-box	CAAT	1005	4	-	Nicotiana glutinosa
BnaA01NPF6.13	CAAT-box	CAAT	1023	4	-	Nicotiana glutinosa
BnaA01NPF6.13	CAAT-box	CAAT	1045	4	+	Nicotiana glutinosa
BnaA01NPF6.13	CAAT-box	CAAT	1282	4	-	Nicotiana glutinosa
BnaA01NPF6.13	CAAT-box	CAAT	1399	4	+	Nicotiana glutinosa
BnaA01NPF6.13	CAAT-box	CAAT	1438	4	-	Nicotiana glutinosa
BnaA01NPF6.13	CAAT-box	CAAT	1478	4	+	Nicotiana glutinosa
BnaA01NPF6.13	CAAT-box	CAAT	1528	4	-	Nicotiana glutinosa
BnaA01NPF6.13	CAAT-box	CAAT	1618	4	-	Nicotiana glutinosa
BnaA01NPF6.13	CAAT-box	CAAT	1689	4	-	Nicotiana glutinosa
BnaA01NPF6.13	CAAT-box	CAAT	1801	4	+	Nicotiana glutinosa
BnaA01NPF6.13	CAAT-box	CAAT	1805	4	+	Nicotiana glutinosa
BnaA01NPF6.13	CAAT-box	CAAT	1831	4	-	Nicotiana glutinosa
BnaA01NPF6.13	G-box	CACGAC	349	6	-	Zea mays	cis-acting regulatory element involved in light responsiveness
BnaA01NPF6.13	MYC	CATGTG	336	6	-	Arabidopsis thaliana
BnaA01NPF6.13	MYC	CATGTG	1274	6	+	Arabidopsis thaliana
BnaA01NPF6.13	MYC	CATGTG	1668	6	-	Arabidopsis thaliana
BnaA01NPF6.13	MYC	CATGTG	1822	6	-	Arabidopsis thaliana
BnaA01NPF6.13	MYC	CATTTG	954	6	-	Arabidopsis thaliana
BnaA01NPF6.13	MYC	CATTTG	1060	6	+	Arabidopsis thaliana
BnaA01NPF6.13	MYC	CATTTG	1413	6	+	Arabidopsis thaliana
BnaA01NPF6.13	MYC	CATTTG	1681	6	-	Arabidopsis thaliana
BnaA01NPF6.13	CAAT-box	CCAAT	1118	5	-	Arabidopsis thaliana	common cis-acting element in promoter and enhancer regions
BnaA01NPF6.13	CAAT-box	CCAAT	1152	5	-	Arabidopsis thaliana	common cis-acting element in promoter and enhancer regions
BnaA01NPF6.13	CAAT-box	CCAAT	1800	5	+	Arabidopsis thaliana	common cis-acting element in promoter and enhancer regions
BnaA01NPF6.13	LTR	CCGAAA	411	6	-	Hordeum vulgare	cis-acting element involved in low-temperature responsiveness
BnaA01NPF6.13	LTR	CCGAAA	1030	6	+	Hordeum vulgare	cis-acting element involved in low-temperature responsiveness
BnaA01NPF6.13	TATA-box	ccTATAAAaa	213	9	-	Arabidopsis thaliana	core promoter element around -30 of transcription start
BnaA01NPF6.13	TATA-box	ccTATAAAaa	609	9	-	Arabidopsis thaliana	core promoter element around -30 of transcription start
BnaA01NPF6.13	CGTCA-motif	CGTCA	1396	5	+	Hordeum vulgare	cis-acting regulatory element involved in the MeJA-responsiveness
BnaA01NPF6.13	Unnamed__4	CTCC	753	4	+	Petroselinum hortense
BnaA01NPF6.13	Unnamed__4	CTCC	1076	4	-	Petroselinum hortense
BnaA01NPF6.13	Unnamed__4	CTCC	1843	4	+	Petroselinum hortense
BnaA01NPF6.13	Unnamed__4	CTCC	1846	4	+	Petroselinum hortense
BnaA01NPF6.13	Unnamed__4	CTCC	1949	4	+	Petroselinum hortense
BnaA01NPF6.13	LAMP-element	CTTTATCA	507	8	+	Pisum sativum	part of a light responsive element
BnaA01NPF6.13	AAGAA-motif	GAAAGAA	797	7	-	Avena sativa
BnaA01NPF6.13	I-box	GATAAGGGT	1909	9	-	Arabidopsis thaliana	part of a light responsive element
BnaA01NPF6.13	AAGAA-motif	gGTAAAGAAA	1534	9	+	Avena sativa
BnaA01NPF6.13	MYB	TAACCA	427	6	+	Arabidopsis thaliana
BnaA01NPF6.13	MYB	TAACCA	994	6	-	Arabidopsis thaliana
BnaA01NPF6.13	MYB-like sequence	TAACCA	427	6	+	Arabidopsis thaliana
BnaA01NPF6.13	MYB-like sequence	TAACCA	994	6	-	Arabidopsis thaliana
BnaA01NPF6.13	TATA-box	TACAAAA	163	7	-	Oryza sativa	core promoter element around -30 of transcription start
BnaA01NPF6.13	TATA-box	TACAAAA	550	7	+	Oryza sativa	core promoter element around -30 of transcription start
BnaA01NPF6.13	TATA-box	TACAAAA	1513	7	-	Oryza sativa	core promoter element around -30 of transcription start
BnaA01NPF6.13	TATA-box	TATA	8	4	+	Arabidopsis thaliana	core promoter element around -30 of transcription start
BnaA01NPF6.13	TATA-box	TATA	15	4	+	Arabidopsis thaliana	core promoter element around -30 of transcription start
BnaA01NPF6.13	TATA-box	TATA	58	4	+	Arabidopsis thaliana	core promoter element around -30 of transcription start
BnaA01NPF6.13	TATA-box	TATA	86	4	+	Arabidopsis thaliana	core promoter element around -30 of transcription start
BnaA01NPF6.13	TATA-box	TATA	134	4	+	Arabidopsis thaliana	core promoter element around -30 of transcription start
BnaA01NPF6.13	TATA-box	TATA	193	4	+	Arabidopsis thaliana	core promoter element around -30 of transcription start
BnaA01NPF6.13	TATA-box	TATA	217	4	+	Arabidopsis thaliana	core promoter element around -30 of transcription start
BnaA01NPF6.13	TATA-box	TATA	233	4	+	Arabidopsis thaliana	core promoter element around -30 of transcription start
BnaA01NPF6.13	TATA-box	TATA	299	4	+	Arabidopsis thaliana	core promoter element around -30 of transcription start
BnaA01NPF6.13	TATA-box	TATA	368	4	+	Arabidopsis thaliana	core promoter element around -30 of transcription start
BnaA01NPF6.13	TATA-box	TATA	469	4	+	Arabidopsis thaliana	core promoter element around -30 of transcription start
BnaA01NPF6.13	TATA-box	TATA	540	4	+	Arabidopsis thaliana	core promoter element around -30 of transcription start
BnaA01NPF6.13	TATA-box	TATA	703	4	+	Arabidopsis thaliana	core promoter element around -30 of transcription start
BnaA01NPF6.13	TATA-box	TATA	720	4	+	Arabidopsis thaliana	core promoter element around -30 of transcription start
BnaA01NPF6.13	TATA-box	TATA	746	4	+	Arabidopsis thaliana	core promoter element around -30 of transcription start
BnaA01NPF6.13	TATA-box	TATA	1149	4	-	Arabidopsis thaliana	core promoter element around -30 of transcription start
BnaA01NPF6.13	TATA-box	TATA	1302	4	-	Arabidopsis thaliana	core promoter element around -30 of transcription start
BnaA01NPF6.13	TATA-box	TATA	1472	4	-	Arabidopsis thaliana	core promoter element around -30 of transcription start
BnaA01NPF6.13	TATA-box	TATA	1596	4	-	Arabidopsis thaliana	core promoter element around -30 of transcription start
BnaA01NPF6.13	TATA-box	TATA	1923	4	-	Arabidopsis thaliana	core promoter element around -30 of transcription start
BnaA01NPF6.13	TATA-box	TATA	1954	4	-	Arabidopsis thaliana	core promoter element around -30 of transcription start
BnaA01NPF6.13	TATA-box	TATA	1993	4	-	Arabidopsis thaliana	core promoter element around -30 of transcription start
BnaA01NPF6.13	TATA-box	TATAA	57	5	-	Arabidopsis thaliana	core promoter element around -30 of transcription start
BnaA01NPF6.13	TATA-box	TATAA	85	5	-	Arabidopsis thaliana	core promoter element around -30 of transcription start
BnaA01NPF6.13	TATA-box	TATAA	133	5	-	Arabidopsis thaliana	core promoter element around -30 of transcription start
BnaA01NPF6.13	TATA-box	TATAA	192	5	-	Arabidopsis thaliana	core promoter element around -30 of transcription start
BnaA01NPF6.13	TATA-box	TATAA	216	5	-	Arabidopsis thaliana	core promoter element around -30 of transcription start
BnaA01NPF6.13	TATA-box	TATAA	539	5	-	Arabidopsis thaliana	core promoter element around -30 of transcription start
BnaA01NPF6.13	TATA-box	TATAA	719	5	-	Arabidopsis thaliana	core promoter element around -30 of transcription start
BnaA01NPF6.13	TATA-box	TATAA	745	5	-	Arabidopsis thaliana	core promoter element around -30 of transcription start
BnaA01NPF6.13	TATA-box	TATAA	1148	5	-	Arabidopsis thaliana	core promoter element around -30 of transcription start
BnaA01NPF6.13	TATA-box	TATAA	1953	5	-	Arabidopsis thaliana	core promoter element around -30 of transcription start
BnaA01NPF6.13	TATA-box	TATAA	1992	5	-	Arabidopsis thaliana	core promoter element around -30 of transcription start
BnaA01NPF6.13	TATA-box	TATAAA	56	6	-	Helianthus annuus	core promoter element around -30 of transcription start
BnaA01NPF6.13	TATA-box	TATAAA	84	6	-	Helianthus annuus	core promoter element around -30 of transcription start
BnaA01NPF6.13	TATA-box	TATAAA	132	6	-	Helianthus annuus	core promoter element around -30 of transcription start
BnaA01NPF6.13	TATA-box	TATAAA	191	6	-	Helianthus annuus	core promoter element around -30 of transcription start
BnaA01NPF6.13	TATA-box	TATAAA	215	6	-	Helianthus annuus	core promoter element around -30 of transcription start
BnaA01NPF6.13	TATA-box	TATAAA	744	6	-	Helianthus annuus	core promoter element around -30 of transcription start
BnaA01NPF6.13	TATA-box	TATAAA	1147	6	-	Helianthus annuus	core promoter element around -30 of transcription start
BnaA01NPF6.13	TATA-box	TATAAA	1991	6	-	Helianthus annuus	core promoter element around -30 of transcription start
BnaA01NPF6.13	TATA-box	TATAAAA	55	7	-	Pisum sativum	core promoter element around -30 of transcription start
BnaA01NPF6.13	TATA-box	TATAAAA	131	7	-	Pisum sativum	core promoter element around -30 of transcription start
BnaA01NPF6.13	TATA-box	TATAAAA	190	7	-	Pisum sativum	core promoter element around -30 of transcription start
BnaA01NPF6.13	TATA-box	TATAAAA	214	7	-	Pisum sativum	core promoter element around -30 of transcription start
BnaA01NPF6.13	TATA-box	TATAAAA	1146	7	-	Pisum sativum	core promoter element around -30 of transcription start
BnaA01NPF6.13	TATA	TATAAAAT	130	8	-	Arabidopsis thaliana
BnaA01NPF6.13	TATA	TATAAAAT	213	8	-	Arabidopsis thaliana
BnaA01NPF6.13	TATA-box	TATAAAT	83	7	-	Brassica juncea	core promoter element around -30 of transcription start
BnaA01NPF6.13	AT~TATA-box	TATATA	231	6	+	Arabidopsis thaliana
BnaA01NPF6.13	TATA-box	TATATA	231	6	+	Arabidopsis thaliana	core promoter element around -30 of transcription start
BnaA01NPF6.13	TATA-box	TATATAA	230	7	-	Arabidopsis thaliana	core promoter element around -30 of transcription start
BnaA01NPF6.13	TATA-box	TATTTAAA	142	8	+	Arabidopsis thaliana	core promoter element around -30 of transcription start
BnaA01NPF6.13	TATA-box	TATTTAAA	1789	8	-	Arabidopsis thaliana	core promoter element around -30 of transcription start
BnaA01NPF6.13	TCA	TCATCTTCAT	573	9	-	Pisum sativum
BnaA01NPF6.13	TCA	TCATCTTCAT	1934	9	+	Pisum sativum
BnaA01NPF6.13	Myc	TCTCTTA	1518	7	-	Arabidopsis thaliana
BnaA01NPF6.13	Myc	TCTCTTA	1721	7	+	Arabidopsis thaliana
BnaA01NPF6.13	TCT-motif	TCTTAC	899	6	+	Arabidopsis thaliana	part of a light responsive element
BnaA01NPF6.13	TCT-motif	TCTTAC	1517	6	-	Arabidopsis thaliana	part of a light responsive element
BnaA01NPF6.13	TCT-motif	TCTTAC	1723	6	+	Arabidopsis thaliana	part of a light responsive element
BnaA01NPF6.13	TGACG-motif	TGACG	1396	5	-	Hordeum vulgare	cis-acting regulatory element involved in the MeJA-responsiveness
BnaA01NPF6.13	as-1	TGACG	1396	5	-	Arabidopsis thaliana
BnaA01NPF7.6	ARE	AAACCA	542	6	+	Zea mays	cis-acting regulatory element essential for the anaerobic induction
BnaA01NPF7.6	ARE	AAACCA	739	6	-	Zea mays	cis-acting regulatory element essential for the anaerobic induction
BnaA01NPF7.6	ARE	AAACCA	1254	6	-	Zea mays	cis-acting regulatory element essential for the anaerobic induction
BnaA01NPF7.6	ARE	AAACCA	1441	6	-	Zea mays	cis-acting regulatory element essential for the anaerobic induction
BnaA01NPF7.6	GATA-motif	AAGATAAGATT	923	10	-	Arabidopsis thaliana	part of a light responsive element
BnaA01NPF7.6	ABRE	ACGTG	1246	5	-	Arabidopsis thaliana	cis-acting element involved in the abscisic acid responsiveness
BnaA01NPF7.6	STRE	AGGGG	1048	5	+	Arabidopsis thaliana
BnaA01NPF7.6	GA-motif	ATAGATAA	744	8	-	Arabidopsis thaliana	part of a light responsive element
BnaA01NPF7.6	GA-motif	ATAGATAA	1556	8	-	Arabidopsis thaliana	part of a light responsive element
BnaA01NPF7.6	TATA-box	ATATAA	12	6	+	Brassica oleracea	core promoter element around -30 of transcription start
BnaA01NPF7.6	TATA-box	ATATAA	172	6	+	Brassica oleracea	core promoter element around -30 of transcription start
BnaA01NPF7.6	TATA-box	ATATAA	185	6	+	Brassica oleracea	core promoter element around -30 of transcription start
BnaA01NPF7.6	TATA-box	ATATAA	287	6	+	Brassica oleracea	core promoter element around -30 of transcription start
BnaA01NPF7.6	TATA-box	ATATAA	606	6	+	Brassica oleracea	core promoter element around -30 of transcription start
BnaA01NPF7.6	TATA-box	ATATAA	671	6	+	Brassica oleracea	core promoter element around -30 of transcription start
BnaA01NPF7.6	TATA-box	ATATAA	1062	6	+	Brassica oleracea	core promoter element around -30 of transcription start
BnaA01NPF7.6	TATA-box	ATATAA	1599	6	+	Brassica oleracea	core promoter element around -30 of transcription start
BnaA01NPF7.6	TATA-box	ATATAT	596	6	+	Brassica napus	core promoter element around -30 of transcription start
BnaA01NPF7.6	TATA-box	ATATAT	619	6	+	Brassica napus	core promoter element around -30 of transcription start
BnaA01NPF7.6	TATA-box	ATATAT	693	6	+	Brassica napus	core promoter element around -30 of transcription start
BnaA01NPF7.6	TATA-box	ATATAT	848	6	+	Brassica napus	core promoter element around -30 of transcription start
BnaA01NPF7.6	TATA-box	ATATAT	1650	6	-	Brassica napus	core promoter element around -30 of transcription start
BnaA01NPF7.6	TATA-box	ATATAT	1652	6	-	Brassica napus	core promoter element around -30 of transcription start
BnaA01NPF7.6	TATA-box	ATATAT	1654	6	-	Brassica napus	core promoter element around -30 of transcription start
BnaA01NPF7.6	TATA-box	ATATAT	1656	6	-	Brassica napus	core promoter element around -30 of transcription start
BnaA01NPF7.6	Box 4	ATTAAT	299	6	+	Petroselinum crispum	part of a conserved DNA module involved in light responsiveness
BnaA01NPF7.6	Box 4	ATTAAT	338	6	+	Petroselinum crispum	part of a conserved DNA module involved in light responsiveness
BnaA01NPF7.6	Box 4	ATTAAT	465	6	+	Petroselinum crispum	part of a conserved DNA module involved in light responsiveness
BnaA01NPF7.6	Box 4	ATTAAT	755	6	+	Petroselinum crispum	part of a conserved DNA module involved in light responsiveness
BnaA01NPF7.6	Box 4	ATTAAT	812	6	+	Petroselinum crispum	part of a conserved DNA module involved in light responsiveness
BnaA01NPF7.6	Box 4	ATTAAT	852	6	+	Petroselinum crispum	part of a conserved DNA module involved in light responsiveness
BnaA01NPF7.6	Box 4	ATTAAT	1616	6	-	Petroselinum crispum	part of a conserved DNA module involved in light responsiveness
BnaA01NPF7.6	Box 4	ATTAAT	1699	6	-	Petroselinum crispum	part of a conserved DNA module involved in light responsiveness
BnaA01NPF7.6	TATA-box	ATTATA	359	6	+	Brassica napus	core promoter element around -30 of transcription start
BnaA01NPF7.6	TATA-box	ATTATA	397	6	+	Brassica napus	core promoter element around -30 of transcription start
BnaA01NPF7.6	TATA-box	ATTATA	415	6	+	Brassica napus	core promoter element around -30 of transcription start
BnaA01NPF7.6	TATA-box	ATTATA	631	6	+	Brassica napus	core promoter element around -30 of transcription start
BnaA01NPF7.6	TATA-box	ATTATA	887	6	+	Brassica napus	core promoter element around -30 of transcription start
BnaA01NPF7.6	TATA-box	ATTATA	900	6	+	Brassica napus	core promoter element around -30 of transcription start
BnaA01NPF7.6	TATA-box	ATTATA	1030	6	+	Brassica napus	core promoter element around -30 of transcription start
BnaA01NPF7.6	TATA-box	ATTATA	1610	6	+	Brassica napus	core promoter element around -30 of transcription start
BnaA01NPF7.6	TATA-box	ATTATA	1694	6	+	Brassica napus	core promoter element around -30 of transcription start
BnaA01NPF7.6	ERE	ATTTTAAA	487	8	-	Nicotiana glutinos
BnaA01NPF7.6	ERE	ATTTTAAA	719	8	+	Nicotiana glutinos
BnaA01NPF7.6	ERE	ATTTTAAA	721	8	-	Nicotiana glutinos
BnaA01NPF7.6	CAAT-box	CAAAT	78	5	-	Pisum sativum	common cis-acting element in promoter and enhancer regions
BnaA01NPF7.6	CAAT-box	CAAAT	238	5	-	Pisum sativum	common cis-acting element in promoter and enhancer regions
BnaA01NPF7.6	CAAT-box	CAAAT	335	5	+	Pisum sativum	common cis-acting element in promoter and enhancer regions
BnaA01NPF7.6	CAAT-box	CAAAT	536	5	-	Pisum sativum	common cis-acting element in promoter and enhancer regions
BnaA01NPF7.6	CAAT-box	CAAAT	750	5	-	Pisum sativum	common cis-acting element in promoter and enhancer regions
BnaA01NPF7.6	CAAT-box	CAAAT	780	5	+	Pisum sativum	common cis-acting element in promoter and enhancer regions
BnaA01NPF7.6	CAAT-box	CAAAT	863	5	+	Pisum sativum	common cis-acting element in promoter and enhancer regions
BnaA01NPF7.6	CAAT-box	CAAAT	931	5	-	Pisum sativum	common cis-acting element in promoter and enhancer regions
BnaA01NPF7.6	CAAT-box	CAAAT	1003	5	+	Pisum sativum	common cis-acting element in promoter and enhancer regions
BnaA01NPF7.6	CAAT-box	CAAAT	1190	5	-	Pisum sativum	common cis-acting element in promoter and enhancer regions
BnaA01NPF7.6	CAAT-box	CAAAT	1212	5	-	Pisum sativum	common cis-acting element in promoter and enhancer regions
BnaA01NPF7.6	CAAT-box	CAAAT	1251	5	-	Pisum sativum	common cis-acting element in promoter and enhancer regions
BnaA01NPF7.6	CAAT-box	CAAAT	1660	5	-	Pisum sativum	common cis-acting element in promoter and enhancer regions
BnaA01NPF7.6	CAAT-box	CAAAT	1817	5	+	Pisum sativum	common cis-acting element in promoter and enhancer regions
BnaA01NPF7.6	CAAT-box	CAAAT	1875	5	-	Pisum sativum	common cis-acting element in promoter and enhancer regions
BnaA01NPF7.6	CAAT-box	CAAAT	1958	5	+	Pisum sativum	common cis-acting element in promoter and enhancer regions
BnaA01NPF7.6	Gap-box	CAAATGAA(A/G)A	73	9	-	Arabidopsis thaliana	part of a light responsive element
BnaA01NPF7.6	Myb-binding site	CAACAG	208	6	-	Nicotiana tabacum
BnaA01NPF7.6	MYB	CAACAG	208	6	-	Arabidopsis thaliana
BnaA01NPF7.6	CAAT-box	CAAT	98	4	-	Nicotiana glutinosa
BnaA01NPF7.6	CAAT-box	CAAT	179	4	+	Nicotiana glutinosa
BnaA01NPF7.6	CAAT-box	CAAT	594	4	+	Nicotiana glutinosa
BnaA01NPF7.6	CAAT-box	CAAT	1042	4	+	Nicotiana glutinosa
BnaA01NPF7.6	CAAT-box	CAAT	1088	4	+	Nicotiana glutinosa
BnaA01NPF7.6	CAAT-box	CAAT	1383	4	+	Nicotiana glutinosa
BnaA01NPF7.6	CAAT-box	CAAT	1473	4	+	Nicotiana glutinosa
BnaA01NPF7.6	CAAT-box	CAAT	1518	4	-	Nicotiana glutinosa
BnaA01NPF7.6	CAAT-box	CAAT	1797	4	-	Nicotiana glutinosa
BnaA01NPF7.6	ABRE4	CACGTA	1246	6	+	Zea mays
BnaA01NPF7.6	MYC	CATTTG	77	6	+	Arabidopsis thaliana
BnaA01NPF7.6	MYC	CATTTG	237	6	+	Arabidopsis thaliana
BnaA01NPF7.6	CAAT-box	CCAAT	1041	5	+	Arabidopsis thaliana	common cis-acting element in promoter and enhancer regions
BnaA01NPF7.6	CAAT-box	CCAAT	1472	5	+	Arabidopsis thaliana	common cis-acting element in promoter and enhancer regions
BnaA01NPF7.6	GC-motif	CCCCCG	1642	6	+	Zea mays	enhancer-like element involved in anoxic specific inducibility
BnaA01NPF7.6	LTR	CCGAAA	1645	6	+	Hordeum vulgare	cis-acting element involved in low-temperature responsiveness
BnaA01NPF7.6	plant_AP-2-like	CGACCAGG	1919	8	+	Oryza sativa	?
BnaA01NPF7.6	OCT	CGCGGATC	996	8	+	Zea mays
BnaA01NPF7.6	CGTCA-motif	CGTCA	1724	5	+	Hordeum vulgare	cis-acting regulatory element involved in the MeJA-responsiveness
BnaA01NPF7.6	ACE	CTAACGTATT	1244	9	+	Petroselinum crispum	cis-acting element involved in light responsiveness
BnaA01NPF7.6	F-box	CTATTCTCATT	383	10	+	Lycopersicon esculentum
BnaA01NPF7.6	Unnamed__4	CTCC	1051	4	-	Petroselinum hortense
BnaA01NPF7.6	Unnamed__4	CTCC	1072	4	-	Petroselinum hortense
BnaA01NPF7.6	Unnamed__4	CTCC	1153	4	-	Petroselinum hortense
BnaA01NPF7.6	Unnamed__4	CTCC	1282	4	+	Petroselinum hortense
BnaA01NPF7.6	Unnamed__4	CTCC	1396	4	-	Petroselinum hortense
BnaA01NPF7.6	Unnamed__4	CTCC	1782	4	+	Petroselinum hortense
BnaA01NPF7.6	AAGAA-motif	GAAAGAA	1338	7	-	Avena sativa
BnaA01NPF7.6	AAGAA-motif	GAAAGAA	1712	7	+	Avena sativa
BnaA01NPF7.6	GT1-motif	GGTTAA	1934	6	-	Arabidopsis thaliana	light responsive element
BnaA01NPF7.6	AT-rich sequence	TAAAATACT	489	9	+	Pisum sativum	element for maximal elicitor-mediated activation (2copies)
BnaA01NPF7.6	Myb	TAACTG	1291	6	+	Arabidopsis thaliana
BnaA01NPF7.6	TATA-box	TACAAAA	201	7	+	Oryza sativa	core promoter element around -30 of transcription start
BnaA01NPF7.6	G-box	TACGTG	1246	6	-	Arabidopsis thaliana	cis-acting regulatory element involved in light responsiveness
BnaA01NPF7.6	ABRE3a	TACGTG	1246	6	-	Zea mays
BnaA01NPF7.6	TATA-box	TATA	13	4	+	Arabidopsis thaliana	core promoter element around -30 of transcription start
BnaA01NPF7.6	TATA-box	TATA	133	4	+	Arabidopsis thaliana	core promoter element around -30 of transcription start
BnaA01NPF7.6	TATA-box	TATA	173	4	+	Arabidopsis thaliana	core promoter element around -30 of transcription start
BnaA01NPF7.6	TATA-box	TATA	186	4	+	Arabidopsis thaliana	core promoter element around -30 of transcription start
BnaA01NPF7.6	TATA-box	TATA	230	4	+	Arabidopsis thaliana	core promoter element around -30 of transcription start
BnaA01NPF7.6	TATA-box	TATA	288	4	+	Arabidopsis thaliana	core promoter element around -30 of transcription start
BnaA01NPF7.6	TATA-box	TATA	323	4	+	Arabidopsis thaliana	core promoter element around -30 of transcription start
BnaA01NPF7.6	TATA-box	TATA	361	4	+	Arabidopsis thaliana	core promoter element around -30 of transcription start
BnaA01NPF7.6	TATA-box	TATA	399	4	+	Arabidopsis thaliana	core promoter element around -30 of transcription start
BnaA01NPF7.6	TATA-box	TATA	405	4	+	Arabidopsis thaliana	core promoter element around -30 of transcription start
BnaA01NPF7.6	TATA-box	TATA	417	4	+	Arabidopsis thaliana	core promoter element around -30 of transcription start
BnaA01NPF7.6	TATA-box	TATA	436	4	+	Arabidopsis thaliana	core promoter element around -30 of transcription start
BnaA01NPF7.6	TATA-box	TATA	550	4	+	Arabidopsis thaliana	core promoter element around -30 of transcription start
BnaA01NPF7.6	TATA-box	TATA	597	4	+	Arabidopsis thaliana	core promoter element around -30 of transcription start
BnaA01NPF7.6	TATA-box	TATA	607	4	+	Arabidopsis thaliana	core promoter element around -30 of transcription start
BnaA01NPF7.6	TATA-box	TATA	622	4	+	Arabidopsis thaliana	core promoter element around -30 of transcription start
BnaA01NPF7.6	TATA-box	TATA	633	4	+	Arabidopsis thaliana	core promoter element around -30 of transcription start
BnaA01NPF7.6	TATA-box	TATA	647	4	+	Arabidopsis thaliana	core promoter element around -30 of transcription start
BnaA01NPF7.6	TATA-box	TATA	672	4	+	Arabidopsis thaliana	core promoter element around -30 of transcription start
BnaA01NPF7.6	TATA-box	TATA	694	4	+	Arabidopsis thaliana	core promoter element around -30 of transcription start
BnaA01NPF7.6	TATA-box	TATA	701	4	+	Arabidopsis thaliana	core promoter element around -30 of transcription start
BnaA01NPF7.6	TATA-box	TATA	706	4	+	Arabidopsis thaliana	core promoter element around -30 of transcription start
BnaA01NPF7.6	TATA-box	TATA	765	4	+	Arabidopsis thaliana	core promoter element around -30 of transcription start
BnaA01NPF7.6	TATA-box	TATA	792	4	+	Arabidopsis thaliana	core promoter element around -30 of transcription start
BnaA01NPF7.6	TATA-box	TATA	832	4	+	Arabidopsis thaliana	core promoter element around -30 of transcription start
BnaA01NPF7.6	TATA-box	TATA	849	4	+	Arabidopsis thaliana	core promoter element around -30 of transcription start
BnaA01NPF7.6	TATA-box	TATA	889	4	+	Arabidopsis thaliana	core promoter element around -30 of transcription start
BnaA01NPF7.6	TATA-box	TATA	902	4	+	Arabidopsis thaliana	core promoter element around -30 of transcription start
BnaA01NPF7.6	TATA-box	TATA	928	4	+	Arabidopsis thaliana	core promoter element around -30 of transcription start
BnaA01NPF7.6	TATA-box	TATA	947	4	+	Arabidopsis thaliana	core promoter element around -30 of transcription start
BnaA01NPF7.6	TATA-box	TATA	958	4	+	Arabidopsis thaliana	core promoter element around -30 of transcription start
BnaA01NPF7.6	TATA-box	TATA	966	4	+	Arabidopsis thaliana	core promoter element around -30 of transcription start
BnaA01NPF7.6	TATA-box	TATA	1032	4	-	Arabidopsis thaliana	core promoter element around -30 of transcription start
BnaA01NPF7.6	TATA-box	TATA	1063	4	-	Arabidopsis thaliana	core promoter element around -30 of transcription start
BnaA01NPF7.6	TATA-box	TATA	1346	4	-	Arabidopsis thaliana	core promoter element around -30 of transcription start
BnaA01NPF7.6	TATA-box	TATA	1358	4	-	Arabidopsis thaliana	core promoter element around -30 of transcription start
BnaA01NPF7.6	TATA-box	TATA	1411	4	-	Arabidopsis thaliana	core promoter element around -30 of transcription start
BnaA01NPF7.6	TATA-box	TATA	1513	4	-	Arabidopsis thaliana	core promoter element around -30 of transcription start
BnaA01NPF7.6	TATA-box	TATA	1600	4	-	Arabidopsis thaliana	core promoter element around -30 of transcription start
BnaA01NPF7.6	TATA-box	TATA	1612	4	-	Arabidopsis thaliana	core promoter element around -30 of transcription start
BnaA01NPF7.6	TATA-box	TATA	1657	4	-	Arabidopsis thaliana	core promoter element around -30 of transcription start
BnaA01NPF7.6	TATA-box	TATA	1696	4	-	Arabidopsis thaliana	core promoter element around -30 of transcription start
BnaA01NPF7.6	TATA-box	TATA	1766	4	-	Arabidopsis thaliana	core promoter element around -30 of transcription start
BnaA01NPF7.6	TATA-box	TATAA	132	5	-	Arabidopsis thaliana	core promoter element around -30 of transcription start
BnaA01NPF7.6	TATA-box	TATAA	229	5	-	Arabidopsis thaliana	core promoter element around -30 of transcription start
BnaA01NPF7.6	TATA-box	TATAA	360	5	-	Arabidopsis thaliana	core promoter element around -30 of transcription start
BnaA01NPF7.6	TATA-box	TATAA	398	5	-	Arabidopsis thaliana	core promoter element around -30 of transcription start
BnaA01NPF7.6	TATA-box	TATAA	416	5	-	Arabidopsis thaliana	core promoter element around -30 of transcription start
BnaA01NPF7.6	TATA-box	TATAA	632	5	-	Arabidopsis thaliana	core promoter element around -30 of transcription start
BnaA01NPF7.6	TATA-box	TATAA	764	5	-	Arabidopsis thaliana	core promoter element around -30 of transcription start
BnaA01NPF7.6	TATA-box	TATAA	888	5	-	Arabidopsis thaliana	core promoter element around -30 of transcription start
BnaA01NPF7.6	TATA-box	TATAA	901	5	-	Arabidopsis thaliana	core promoter element around -30 of transcription start
BnaA01NPF7.6	TATA-box	TATAA	927	5	-	Arabidopsis thaliana	core promoter element around -30 of transcription start
BnaA01NPF7.6	TATA-box	TATAA	957	5	-	Arabidopsis thaliana	core promoter element around -30 of transcription start
BnaA01NPF7.6	TATA-box	TATAA	965	5	-	Arabidopsis thaliana	core promoter element around -30 of transcription start
BnaA01NPF7.6	TATA-box	TATAA	1031	5	-	Arabidopsis thaliana	core promoter element around -30 of transcription start
BnaA01NPF7.6	TATA-box	TATAA	1345	5	-	Arabidopsis thaliana	core promoter element around -30 of transcription start
BnaA01NPF7.6	TATA-box	TATAA	1357	5	-	Arabidopsis thaliana	core promoter element around -30 of transcription start
BnaA01NPF7.6	TATA-box	TATAA	1410	5	-	Arabidopsis thaliana	core promoter element around -30 of transcription start
BnaA01NPF7.6	TATA-box	TATAA	1611	5	-	Arabidopsis thaliana	core promoter element around -30 of transcription start
BnaA01NPF7.6	TATA-box	TATAA	1695	5	-	Arabidopsis thaliana	core promoter element around -30 of transcription start
BnaA01NPF7.6	TATA-box	TATAAA	131	6	-	Helianthus annuus	core promoter element around -30 of transcription start
BnaA01NPF7.6	TATA-box	TATAAA	284	6	-	Helianthus annuus	core promoter element around -30 of transcription start
BnaA01NPF7.6	TATA-box	TATAAA	763	6	-	Helianthus annuus	core promoter element around -30 of transcription start
BnaA01NPF7.6	TATA-box	TATAAA	845	6	-	Helianthus annuus	core promoter element around -30 of transcription start
BnaA01NPF7.6	TATA-box	TATAAA	964	6	-	Helianthus annuus	core promoter element around -30 of transcription start
BnaA01NPF7.6	TATA-box	TATAAA	1356	6	-	Helianthus annuus	core promoter element around -30 of transcription start
BnaA01NPF7.6	TATA-box	TATAAA	1509	6	-	Helianthus annuus	core promoter element around -30 of transcription start
BnaA01NPF7.6	TATA-box	TATAAA	1596	6	-	Helianthus annuus	core promoter element around -30 of transcription start
BnaA01NPF7.6	TATA-box	TATAAAA	283	7	-	Pisum sativum	core promoter element around -30 of transcription start
BnaA01NPF7.6	TATA-box	TATAAAA	844	7	-	Pisum sativum	core promoter element around -30 of transcription start
BnaA01NPF7.6	TATA-box	TATAAAA	1508	7	-	Pisum sativum	core promoter element around -30 of transcription start
BnaA01NPF7.6	TATA	TATAAAAT	282	8	-	Arabidopsis thaliana
BnaA01NPF7.6	TATA	TATAAAAT	550	8	+	Arabidopsis thaliana
BnaA01NPF7.6	TATA	TATAAAAT	607	8	+	Arabidopsis thaliana
BnaA01NPF7.6	TATA	TATAAAAT	832	8	+	Arabidopsis thaliana
BnaA01NPF7.6	TATA	TATAAAAT	966	8	+	Arabidopsis thaliana
BnaA01NPF7.6	TATA	TATAAAAT	1507	8	-	Arabidopsis thaliana
BnaA01NPF7.6	TATA-box	TATAAAT	130	7	-	Brassica juncea	core promoter element around -30 of transcription start
BnaA01NPF7.6	TATA-box	TATAAAT	762	7	-	Brassica juncea	core promoter element around -30 of transcription start
BnaA01NPF7.6	TATA-box	TATAAAT	963	7	-	Brassica juncea	core promoter element around -30 of transcription start
BnaA01NPF7.6	TATA-box	TATAAAT	1355	7	-	Brassica juncea	core promoter element around -30 of transcription start
BnaA01NPF7.6	TATA-box	TATAAAT	1595	7	-	Brassica juncea	core promoter element around -30 of transcription start
BnaA01NPF7.6	TATA-box	TATAAATA	129	8	-	Daucus carota	core promoter element around -30 of transcription start
BnaA01NPF7.6	TATA-box	TATAAATA	761	8	-	Daucus carota	core promoter element around -30 of transcription start
BnaA01NPF7.6	TATA-box	TATAAATA	1354	8	-	Daucus carota	core promoter element around -30 of transcription start
BnaA01NPF7.6	TATA-box	TATAAGAA	1342	8	-	Zea mays	core promoter element around -30 of transcription start
BnaA01NPF7.6	TATA-box	TATAAGAA	1407	8	-	Zea mays	core promoter element around -30 of transcription start
BnaA01NPF7.6	TATA-box	TATACA	548	6	-	Helianthus annuus	core promoter element around -30 of transcription start
BnaA01NPF7.6	TATA-box	TATACA	830	6	-	Helianthus annuus	core promoter element around -30 of transcription start
BnaA01NPF7.6	TATA-box	TATACA	945	6	-	Helianthus annuus	core promoter element around -30 of transcription start
BnaA01NPF7.6	AT~TATA-box	TATATA	171	6	+	Arabidopsis thaliana
BnaA01NPF7.6	AT~TATA-box	TATATA	286	6	+	Arabidopsis thaliana
BnaA01NPF7.6	AT~TATA-box	TATATA	620	6	+	Arabidopsis thaliana
BnaA01NPF7.6	AT~TATA-box	TATATA	847	6	+	Arabidopsis thaliana
BnaA01NPF7.6	AT~TATA-box	TATATA	1511	6	-	Arabidopsis thaliana
BnaA01NPF7.6	AT~TATA-box	TATATA	1598	6	-	Arabidopsis thaliana
BnaA01NPF7.6	AT~TATA-box	TATATA	1651	6	-	Arabidopsis thaliana
BnaA01NPF7.6	AT~TATA-box	TATATA	1653	6	-	Arabidopsis thaliana
BnaA01NPF7.6	AT~TATA-box	TATATA	1655	6	-	Arabidopsis thaliana
BnaA01NPF7.6	TATA-box	TATATA	171	6	+	Arabidopsis thaliana	core promoter element around -30 of transcription start
BnaA01NPF7.6	TATA-box	TATATA	286	6	+	Arabidopsis thaliana	core promoter element around -30 of transcription start
BnaA01NPF7.6	TATA-box	TATATA	620	6	+	Arabidopsis thaliana	core promoter element around -30 of transcription start
BnaA01NPF7.6	TATA-box	TATATA	847	6	+	Arabidopsis thaliana	core promoter element around -30 of transcription start
BnaA01NPF7.6	TATA-box	TATATA	1511	6	-	Arabidopsis thaliana	core promoter element around -30 of transcription start
BnaA01NPF7.6	TATA-box	TATATA	1598	6	-	Arabidopsis thaliana	core promoter element around -30 of transcription start
BnaA01NPF7.6	TATA-box	TATATA	1653	6	-	Arabidopsis thaliana	core promoter element around -30 of transcription start
BnaA01NPF7.6	TATA-box	TATATA	1655	6	-	Arabidopsis thaliana	core promoter element around -30 of transcription start
BnaA01NPF7.6	TATA-box	TATATAA	170	7	-	Arabidopsis thaliana	core promoter element around -30 of transcription start
BnaA01NPF7.6	TATA-box	TATATAA	285	7	-	Arabidopsis thaliana	core promoter element around -30 of transcription start
BnaA01NPF7.6	TATA-box	TATATAA	846	7	-	Arabidopsis thaliana	core promoter element around -30 of transcription start
BnaA01NPF7.6	TATA-box	TATATAA	1510	7	-	Arabidopsis thaliana	core promoter element around -30 of transcription start
BnaA01NPF7.6	TATA-box	TATATAA	1597	7	-	Arabidopsis thaliana	core promoter element around -30 of transcription start
BnaA01NPF7.6	AT~TATA-box	TATATAAA	284	8	-	Arabidopsis thaliana
BnaA01NPF7.6	AT~TATA-box	TATATAAA	845	8	-	Arabidopsis thaliana
BnaA01NPF7.6	AT~TATA-box	TATATAAA	1509	8	-	Arabidopsis thaliana
BnaA01NPF7.6	AT~TATA-box	TATATAAA	1596	8	-	Arabidopsis thaliana
BnaA01NPF7.6	TATA-box	taTATAAAtc	1594	9	-	Arabidopsis thaliana	core promoter element around -30 of transcription start
BnaA01NPF7.6	TATA-box	TATATTTATATTT	1648	12	-	Avena sativa	core promoter element around -30 of transcription start
BnaA01NPF7.6	TATA-box	TATATTTATATTT	1651	12	+	Avena sativa	core promoter element around -30 of transcription start
BnaA01NPF7.6	TATA-box	TATTTAAA	485	8	+	Arabidopsis thaliana	core promoter element around -30 of transcription start
BnaA01NPF7.6	TATA-box	TATTTAAA	529	8	+	Arabidopsis thaliana	core promoter element around -30 of transcription start
BnaA01NPF7.6	TATA-box	TATTTAAA	581	8	+	Arabidopsis thaliana	core promoter element around -30 of transcription start
BnaA01NPF7.6	TATA-box	TATTTAAA	653	8	-	Arabidopsis thaliana	core promoter element around -30 of transcription start
BnaA01NPF7.6	TCA-element	TCAGAAGAGG	1738	9	-	Brassica oleracea	cis-acting element involved in salicylic acid responsiveness
BnaA01NPF7.6	TCT-motif	TCTTAC	1423	6	+	Arabidopsis thaliana	part of a light responsive element
BnaA01NPF7.6	as-1	TGACG	1724	5	-	Arabidopsis thaliana
BnaA01NPF7.6	TGACG-motif	TGACG	1724	5	-	Hordeum vulgare	cis-acting regulatory element involved in the MeJA-responsiveness
BnaA01NPF7.6	chs-CMA1a	TTACTTAA	1230	8	+	Daucus carota	part of a light responsive element
BnaA02NPF2.1	WUN-motif	AAATTACT	1369	8	-	Nicotiana glutinosa
BnaA02NPF2.1	G-box	ACACGTGT	631	8	+	Brassica napus	cis-acting regulatory element involved in light responsiveness
BnaA02NPF2.1	ABRE	ACGTG	522	5	-	Arabidopsis thaliana	cis-acting element involved in the abscisic acid responsiveness
BnaA02NPF2.1	ABRE	ACGTG	633	5	+	Arabidopsis thaliana	cis-acting element involved in the abscisic acid responsiveness
BnaA02NPF2.1	ABRE	ACGTG	764	5	+	Arabidopsis thaliana	cis-acting element involved in the abscisic acid responsiveness
BnaA02NPF2.1	ABRE	ACGTG	787	5	-	Arabidopsis thaliana	cis-acting element involved in the abscisic acid responsiveness
BnaA02NPF2.1	ABRE	ACGTG	794	5	-	Arabidopsis thaliana	cis-acting element involved in the abscisic acid responsiveness
BnaA02NPF2.1	ABRE	ACGTG	827	5	+	Arabidopsis thaliana	cis-acting element involved in the abscisic acid responsiveness
BnaA02NPF2.1	ABRE	ACGTG	980	5	+	Arabidopsis thaliana	cis-acting element involved in the abscisic acid responsiveness
BnaA02NPF2.1	ABRE	ACGTG	1261	5	+	Arabidopsis thaliana	cis-acting element involved in the abscisic acid responsiveness
BnaA02NPF2.1	ABRE	ACGTG	1740	5	+	Arabidopsis thaliana	cis-acting element involved in the abscisic acid responsiveness
BnaA02NPF2.1	AE-box	AGAAACAA	1615	8	-	Arabidopsis thaliana	part of a module for light response
BnaA02NPF2.1	AE-box	AGAAACTT	40	8	-	Arabidopsis thaliana	part of a module for light response
BnaA02NPF2.1	STRE	AGGGG	294	5	+	Arabidopsis thaliana
BnaA02NPF2.1	STRE	AGGGG	1014	5	+	Arabidopsis thaliana
BnaA02NPF2.1	GA-motif	ATAGATAA	1282	8	-	Arabidopsis thaliana	part of a light responsive element
BnaA02NPF2.1	TATA-box	ATATAA	1167	6	+	Brassica oleracea	core promoter element around -30 of transcription start
BnaA02NPF2.1	TATA-box	ATATAA	1424	6	+	Brassica oleracea	core promoter element around -30 of transcription start
BnaA02NPF2.1	TATA-box	ATATAT	1165	6	-	Brassica napus	core promoter element around -30 of transcription start
BnaA02NPF2.1	TATA-box	ATATAT	1351	6	-	Brassica napus	core promoter element around -30 of transcription start
BnaA02NPF2.1	TATA-box	ATATAT	1439	6	-	Brassica napus	core promoter element around -30 of transcription start
BnaA02NPF2.1	TATA-box	ATATAT	1732	6	-	Brassica napus	core promoter element around -30 of transcription start
BnaA02NPF2.1	TATA-box	ATATAT	1746	6	-	Brassica napus	core promoter element around -30 of transcription start
BnaA02NPF2.1	Box 4	ATTAAT	1774	6	-	Petroselinum crispum	part of a conserved DNA module involved in light responsiveness
BnaA02NPF2.1	TATA-box	ATTATA	1421	6	+	Brassica napus	core promoter element around -30 of transcription start
BnaA02NPF2.1	TC-rich repeats	ATTCTCTAAC	1519	9	-	Nicotiana tabacum	cis-acting element involved in defense and stress responsiveness
BnaA02NPF2.1	ERE	ATTTTAAA	170	8	+	Nicotiana glutinos
BnaA02NPF2.1	CAAT-box	CAAAT	227	5	-	Pisum sativum	common cis-acting element in promoter and enhancer regions
BnaA02NPF2.1	CAAT-box	CAAAT	236	5	+	Pisum sativum	common cis-acting element in promoter and enhancer regions
BnaA02NPF2.1	CAAT-box	CAAAT	1276	5	-	Pisum sativum	common cis-acting element in promoter and enhancer regions
BnaA02NPF2.1	CAAT-box	CAAAT	1336	5	+	Pisum sativum	common cis-acting element in promoter and enhancer regions
BnaA02NPF2.1	CAAT-box	CAAAT	1342	5	-	Pisum sativum	common cis-acting element in promoter and enhancer regions
BnaA02NPF2.1	CAAT-box	CAAAT	1373	5	-	Pisum sativum	common cis-acting element in promoter and enhancer regions
BnaA02NPF2.1	CAAT-box	CAAAT	1453	5	+	Pisum sativum	common cis-acting element in promoter and enhancer regions
BnaA02NPF2.1	CAAT-box	CAAAT	1595	5	+	Pisum sativum	common cis-acting element in promoter and enhancer regions
BnaA02NPF2.1	CAAT-box	CAAAT	1613	5	-	Pisum sativum	common cis-acting element in promoter and enhancer regions
BnaA02NPF2.1	CAAT-box	CAAAT	1804	5	+	Pisum sativum	common cis-acting element in promoter and enhancer regions
BnaA02NPF2.1	CAAT-box	CAAAT	1983	5	+	Pisum sativum	common cis-acting element in promoter and enhancer regions
BnaA02NPF2.1	MYB	CAACAG	46	6	-	Arabidopsis thaliana
BnaA02NPF2.1	Myb-binding site	CAACAG	46	6	-	Nicotiana tabacum
BnaA02NPF2.1	MYB	CAACCA	503	6	+	Arabidopsis thaliana
BnaA02NPF2.1	MYB	CAACCA	512	6	+	Arabidopsis thaliana
BnaA02NPF2.1	MYB	CAACCA	1663	6	+	Arabidopsis thaliana
BnaA02NPF2.1	CCAAT-box	CAACGG	934	6	-	Hordeum vulgare	MYBHv1 binding site
BnaA02NPF2.1	CCAAT-box	CAACGG	1002	6	+	Hordeum vulgare	MYBHv1 binding site
BnaA02NPF2.1	CCAAT-box	CAACGG	1657	6	+	Hordeum vulgare	MYBHv1 binding site
BnaA02NPF2.1	CAAT-box	CAAT	54	4	-	Nicotiana glutinosa
BnaA02NPF2.1	CAAT-box	CAAT	696	4	-	Nicotiana glutinosa
BnaA02NPF2.1	CAAT-box	CAAT	898	4	-	Nicotiana glutinosa
BnaA02NPF2.1	CAAT-box	CAAT	1188	4	-	Nicotiana glutinosa
BnaA02NPF2.1	CAAT-box	CAAT	1237	4	-	Nicotiana glutinosa
BnaA02NPF2.1	CAAT-box	CAAT	1299	4	-	Nicotiana glutinosa
BnaA02NPF2.1	CAAT-box	CAAT	1447	4	+	Nicotiana glutinosa
BnaA02NPF2.1	CAAT-box	CAAT	1694	4	+	Nicotiana glutinosa
BnaA02NPF2.1	CAAT-box	CAAT	1717	4	+	Nicotiana glutinosa
BnaA02NPF2.1	CAAT-box	CAAT	1730	4	+	Nicotiana glutinosa
BnaA02NPF2.1	CAAT-box	CAAT	1754	4	+	Nicotiana glutinosa
BnaA02NPF2.1	CAAT-box	CAAT	1795	4	-	Nicotiana glutinosa
BnaA02NPF2.1	CAAT-box	CAAT	1832	4	+	Nicotiana glutinosa
BnaA02NPF2.1	CAAT-box	CAAT	1860	4	+	Nicotiana glutinosa
BnaA02NPF2.1	ABRE4	CACGTA	1260	6	-	Zea mays
BnaA02NPF2.1	ABRE	CACGTG	632	6	+	Arabidopsis thaliana	cis-acting element involved in the abscisic acid responsiveness
BnaA02NPF2.1	ABRE	CACGTG	979	6	+	Arabidopsis thaliana	cis-acting element involved in the abscisic acid responsiveness
BnaA02NPF2.1	ABRE	CACGTG	1739	6	-	Arabidopsis thaliana	cis-acting element involved in the abscisic acid responsiveness
BnaA02NPF2.1	G-Box	CACGTG	632	6	+	Pisum sativum	cis-acting regulatory element involved in light responsiveness
BnaA02NPF2.1	G-Box	CACGTG	979	6	+	Pisum sativum	cis-acting regulatory element involved in light responsiveness
BnaA02NPF2.1	G-Box	CACGTG	1739	6	-	Pisum sativum	cis-acting regulatory element involved in light responsiveness
BnaA02NPF2.1	G-box	CACGTG	632	6	+	Arabidopsis thaliana	cis-acting regulatory element involved in light responsiveness
BnaA02NPF2.1	G-box	CACGTG	979	6	+	Arabidopsis thaliana	cis-acting regulatory element involved in light responsiveness
BnaA02NPF2.1	G-box	CACGTG	1739	6	-	Arabidopsis thaliana	cis-acting regulatory element involved in light responsiveness
BnaA02NPF2.1	G-Box	CACGTT	522	6	+	Pisum sativum	cis-acting regulatory element involved in light responsiveness
BnaA02NPF2.1	G-Box	CACGTT	763	6	-	Pisum sativum	cis-acting regulatory element involved in light responsiveness
BnaA02NPF2.1	G-Box	CACGTT	787	6	+	Pisum sativum	cis-acting regulatory element involved in light responsiveness
BnaA02NPF2.1	G-Box	CACGTT	794	6	+	Pisum sativum	cis-acting regulatory element involved in light responsiveness
BnaA02NPF2.1	G-Box	CACGTT	826	6	-	Pisum sativum	cis-acting regulatory element involved in light responsiveness
BnaA02NPF2.1	RY-element	CATGCATG	327	8	+	Helianthus annuus	cis-acting regulatory element involved in seed-specific regulation
BnaA02NPF2.1	MYC	CATGTG	325	6	-	Arabidopsis thaliana
BnaA02NPF2.1	MYC	CATGTG	811	6	+	Arabidopsis thaliana
BnaA02NPF2.1	CAAT-box	CCAAT	994	5	-	Arabidopsis thaliana	common cis-acting element in promoter and enhancer regions
BnaA02NPF2.1	CAAT-box	CCAAT	1462	5	-	Arabidopsis thaliana	common cis-acting element in promoter and enhancer regions
BnaA02NPF2.1	CAAT-box	CCAAT	1693	5	+	Arabidopsis thaliana	common cis-acting element in promoter and enhancer regions
BnaA02NPF2.1	CAAT-box	CCAAT	1716	5	+	Arabidopsis thaliana	common cis-acting element in promoter and enhancer regions
BnaA02NPF2.1	CAAT-box	CCAAT	1753	5	+	Arabidopsis thaliana	common cis-acting element in promoter and enhancer regions
BnaA02NPF2.1	CAAT-box	CCAAT	1831	5	+	Arabidopsis thaliana	common cis-acting element in promoter and enhancer regions
BnaA02NPF2.1	GC-motif	CCCCCG	1005	6	-	Zea mays	enhancer-like element involved in anoxic specific inducibility
BnaA02NPF2.1	CCGTCC-box	CCGTCC	371	6	-	Petroselinum hortense
BnaA02NPF2.1	CCGTCC-box	CCGTCC	1058	6	-	Petroselinum hortense
BnaA02NPF2.1	A-box	CCGTCC	371	6	-	Petroselinum crispum	cis-acting regulatory element
BnaA02NPF2.1	A-box	CCGTCC	1058	6	-	Petroselinum crispum	cis-acting regulatory element
BnaA02NPF2.1	CCGTCC motif	CCGTCC	371	6	-	Nicotiana tabacum
BnaA02NPF2.1	CCGTCC motif	CCGTCC	1058	6	-	Nicotiana tabacum
BnaA02NPF2.1	MYB recognition site	CCGTTG	934	6	+	Arabidopsis thaliana
BnaA02NPF2.1	MYB recognition site	CCGTTG	1002	6	-	Arabidopsis thaliana
BnaA02NPF2.1	MYB recognition site	CCGTTG	1657	6	-	Arabidopsis thaliana
BnaA02NPF2.1	CGTCA-motif	CGTCA	222	5	-	Hordeum vulgare	cis-acting regulatory element involved in the MeJA-responsiveness
BnaA02NPF2.1	CGTCA-motif	CGTCA	388	5	+	Hordeum vulgare	cis-acting regulatory element involved in the MeJA-responsiveness
BnaA02NPF2.1	CGTCA-motif	CGTCA	447	5	-	Hordeum vulgare	cis-acting regulatory element involved in the MeJA-responsiveness
BnaA02NPF2.1	Unnamed__1	CGTGG	521	5	-	Zea mays
BnaA02NPF2.1	Unnamed__1	CGTGG	576	5	-	Zea mays
BnaA02NPF2.1	Unnamed__1	CGTGG	765	5	+	Zea mays
BnaA02NPF2.1	Unnamed__1	CGTGG	828	5	+	Zea mays
BnaA02NPF2.1	Unnamed__1	CGTGG	921	5	+	Zea mays
BnaA02NPF2.1	Unnamed__1	CGTGG	1262	5	+	Zea mays
BnaA02NPF2.1	Unnamed__1	CGTGG	1738	5	-	Zea mays
BnaA02NPF2.1	Unnamed__4	CTCC	292	4	-	Petroselinum hortense
BnaA02NPF2.1	Unnamed__4	CTCC	407	4	+	Petroselinum hortense
BnaA02NPF2.1	Unnamed__4	CTCC	471	4	+	Petroselinum hortense
BnaA02NPF2.1	Unnamed__4	CTCC	540	4	+	Petroselinum hortense
BnaA02NPF2.1	Unnamed__4	CTCC	570	4	+	Petroselinum hortense
BnaA02NPF2.1	Unnamed__4	CTCC	689	4	-	Petroselinum hortense
BnaA02NPF2.1	Unnamed__4	CTCC	777	4	-	Petroselinum hortense
BnaA02NPF2.1	Unnamed__4	CTCC	831	4	-	Petroselinum hortense
BnaA02NPF2.1	Unnamed__4	CTCC	928	4	-	Petroselinum hortense
BnaA02NPF2.1	Unnamed__4	CTCC	1009	4	-	Petroselinum hortense
BnaA02NPF2.1	Unnamed__4	CTCC	1041	4	-	Petroselinum hortense
BnaA02NPF2.1	Unnamed__4	CTCC	1055	4	-	Petroselinum hortense
BnaA02NPF2.1	Unnamed__4	CTCC	1080	4	-	Petroselinum hortense
BnaA02NPF2.1	Unnamed__4	CTCC	1083	4	-	Petroselinum hortense
BnaA02NPF2.1	Unnamed__4	CTCC	1086	4	-	Petroselinum hortense
BnaA02NPF2.1	Unnamed__4	CTCC	1911	4	+	Petroselinum hortense
BnaA02NPF2.1	Unnamed__4	CTCC	1914	4	+	Petroselinum hortense
BnaA02NPF2.1	ABRE	GACACGTGGC	630	9	+	Triticum aestivum	cis-acting element involved in the abscisic acid responsiveness
BnaA02NPF2.1	GTGGC-motif	GATTCTGTGGC	530	10	+	Spinacia oleracea	part of a light responsive element
BnaA02NPF2.1	ABRE	GCAACGTGTC	785	10	-	Hordeum vulgare	cis-acting element involved in the abscisic acid responsiveness
BnaA02NPF2.1	CAT-box	GCCACT	61	6	-	Arabidopsis thaliana	cis-acting regulatory element related to meristem expression
BnaA02NPF2.1	AAGAA-motif	gGTAAAGAAA	1967	9	-	Avena sativa
BnaA02NPF2.1	G-box	TAAACGTG	522	8	-	Brassica oleracea	cis-acting regulatory element involved in light responsiveness
BnaA02NPF2.1	TATA-box	TAAAGATT	1249	8	-	Arabidopsis thaliana	core promoter element around -30 of transcription start
BnaA02NPF2.1	MYB	TAACCA	259	6	-	Arabidopsis thaliana
BnaA02NPF2.1	MYB	TAACCA	1457	6	+	Arabidopsis thaliana
BnaA02NPF2.1	MYB-like sequence	TAACCA	259	6	-	Arabidopsis thaliana
BnaA02NPF2.1	MYB-like sequence	TAACCA	1457	6	+	Arabidopsis thaliana
BnaA02NPF2.1	TATA-box	TACAAAA	1292	7	+	Oryza sativa	core promoter element around -30 of transcription start
BnaA02NPF2.1	TATA-box	TACAAAA	1401	7	+	Oryza sativa	core promoter element around -30 of transcription start
BnaA02NPF2.1	ABRE3a	TACGTG	1260	6	+	Zea mays
BnaA02NPF2.1	G-box	TACGTG	1260	6	+	Arabidopsis thaliana	cis-acting regulatory element involved in light responsiveness
BnaA02NPF2.1	TATA-box	TATA	183	4	+	Arabidopsis thaliana	core promoter element around -30 of transcription start
BnaA02NPF2.1	TATA-box	TATA	306	4	+	Arabidopsis thaliana	core promoter element around -30 of transcription start
BnaA02NPF2.1	TATA-box	TATA	1168	4	-	Arabidopsis thaliana	core promoter element around -30 of transcription start
BnaA02NPF2.1	TATA-box	TATA	1222	4	-	Arabidopsis thaliana	core promoter element around -30 of transcription start
BnaA02NPF2.1	TATA-box	TATA	1305	4	-	Arabidopsis thaliana	core promoter element around -30 of transcription start
BnaA02NPF2.1	TATA-box	TATA	1352	4	-	Arabidopsis thaliana	core promoter element around -30 of transcription start
BnaA02NPF2.1	TATA-box	TATA	1425	4	-	Arabidopsis thaliana	core promoter element around -30 of transcription start
BnaA02NPF2.1	TATA-box	TATA	1440	4	-	Arabidopsis thaliana	core promoter element around -30 of transcription start
BnaA02NPF2.1	TATA-box	TATA	1533	4	-	Arabidopsis thaliana	core promoter element around -30 of transcription start
BnaA02NPF2.1	TATA-box	TATA	1570	4	-	Arabidopsis thaliana	core promoter element around -30 of transcription start
BnaA02NPF2.1	TATA-box	TATA	1602	4	-	Arabidopsis thaliana	core promoter element around -30 of transcription start
BnaA02NPF2.1	TATA-box	TATA	1733	4	-	Arabidopsis thaliana	core promoter element around -30 of transcription start
BnaA02NPF2.1	TATA-box	TATA	1747	4	-	Arabidopsis thaliana	core promoter element around -30 of transcription start
BnaA02NPF2.1	TATA-box	TATA	1842	4	-	Arabidopsis thaliana	core promoter element around -30 of transcription start
BnaA02NPF2.1	TATA-box	TATA	1946	4	-	Arabidopsis thaliana	core promoter element around -30 of transcription start
BnaA02NPF2.1	TATA-box	TATAA	182	5	-	Arabidopsis thaliana	core promoter element around -30 of transcription start
BnaA02NPF2.1	TATA-box	TATAA	1221	5	-	Arabidopsis thaliana	core promoter element around -30 of transcription start
BnaA02NPF2.1	TATA-box	TATAA	1532	5	-	Arabidopsis thaliana	core promoter element around -30 of transcription start
BnaA02NPF2.1	TATA-box	TATAA	1569	5	-	Arabidopsis thaliana	core promoter element around -30 of transcription start
BnaA02NPF2.1	TATA-box	TATAA	1601	5	-	Arabidopsis thaliana	core promoter element around -30 of transcription start
BnaA02NPF2.1	TATA-box	TATAAA	181	6	-	Helianthus annuus	core promoter element around -30 of transcription start
BnaA02NPF2.1	TATA-box	TATAAA	1162	6	-	Helianthus annuus	core promoter element around -30 of transcription start
BnaA02NPF2.1	TATA-box	TATAAA	1220	6	-	Helianthus annuus	core promoter element around -30 of transcription start
BnaA02NPF2.1	TATA-box	TATAAA	1531	6	-	Helianthus annuus	core promoter element around -30 of transcription start
BnaA02NPF2.1	TATA-box	TATAAAA	180	7	-	Pisum sativum	core promoter element around -30 of transcription start
BnaA02NPF2.1	TATA-box	TATAAAA	1219	7	-	Pisum sativum	core promoter element around -30 of transcription start
BnaA02NPF2.1	TATA-box	TATAAAA	1530	7	-	Pisum sativum	core promoter element around -30 of transcription start
BnaA02NPF2.1	TATA	TATAAAAT	179	8	-	Arabidopsis thaliana
BnaA02NPF2.1	TATA	TATAAAAT	1222	8	+	Arabidopsis thaliana
BnaA02NPF2.1	TATA-box	TATAAAT	1161	7	-	Brassica juncea	core promoter element around -30 of transcription start
BnaA02NPF2.1	AT~TATA-box	TATATA	1164	6	-	Arabidopsis thaliana
BnaA02NPF2.1	AT~TATA-box	TATATA	1166	6	-	Arabidopsis thaliana
BnaA02NPF2.1	AT~TATA-box	TATATA	1423	6	-	Arabidopsis thaliana
BnaA02NPF2.1	TATA-box	TATATA	1164	6	-	Arabidopsis thaliana	core promoter element around -30 of transcription start
BnaA02NPF2.1	TATA-box	TATATA	1166	6	-	Arabidopsis thaliana	core promoter element around -30 of transcription start
BnaA02NPF2.1	TATA-box	TATATA	1423	6	-	Arabidopsis thaliana	core promoter element around -30 of transcription start
BnaA02NPF2.1	TATA-box	TATATAA	1163	7	-	Arabidopsis thaliana	core promoter element around -30 of transcription start
BnaA02NPF2.1	TATA-box	TATATAA	1422	7	-	Arabidopsis thaliana	core promoter element around -30 of transcription start
BnaA02NPF2.1	AT~TATA-box	TATATAAA	1162	8	-	Arabidopsis thaliana
BnaA02NPF2.1	TATA-box	taTATAAAtc	1160	10	-	Arabidopsis thaliana	core promoter element around -30 of transcription start
BnaA02NPF2.1	TATA-box	TATATTTATATTT	188	12	+	Avena sativa	core promoter element around -30 of transcription start
BnaA02NPF2.1	TATA-box	TATTTAAA	172	8	-	Arabidopsis thaliana	core promoter element around -30 of transcription start
BnaA02NPF2.1	Unnamed__10	TCCACGTAGA	1258	9	-	Zea mays
BnaA02NPF2.1	Unnamed__8	TCCACGTAGA	1258	9	-	Zea mays
BnaA02NPF2.1	Unnamed__14	TCCACGTAGA	1258	9	-	Zea mays
BnaA02NPF2.1	Unnamed__12	TCCACGTAGA	1258	9	-	Zea mays
BnaA02NPF2.1	Myc	TCTCTTA	357	7	+	Arabidopsis thaliana
BnaA02NPF2.1	Myc	TCTCTTA	1782	7	-	Arabidopsis thaliana
BnaA02NPF2.1	GARE-motif	TCTGTTG	45	7	+	Brassica oleracea	gibberellin-responsive element
BnaA02NPF2.1	TGACG-motif	TGACG	222	5	+	Hordeum vulgare	cis-acting regulatory element involved in the MeJA-responsiveness
BnaA02NPF2.1	TGACG-motif	TGACG	388	5	-	Hordeum vulgare	cis-acting regulatory element involved in the MeJA-responsiveness
BnaA02NPF2.1	TGACG-motif	TGACG	447	5	+	Hordeum vulgare	cis-acting regulatory element involved in the MeJA-responsiveness
BnaA02NPF2.1	as-1	TGACG	222	5	+	Arabidopsis thaliana
BnaA02NPF2.1	as-1	TGACG	388	5	-	Arabidopsis thaliana
BnaA02NPF2.1	as-1	TGACG	447	5	+	Arabidopsis thaliana
BnaA02NPF2.1	chs-CMA1a	TTACTTAA	1809	8	-	Daucus carota	part of a light responsive element
BnaA02NPF2.23	WUN-motif	AAATTACT	1199	8	-	Nicotiana glutinosa
BnaA02NPF2.23	WUN-motif	AAATTACTA	1198	9	-	Nicotiana glutinosa
BnaA02NPF2.23	MRE	AACCTAA	1320	7	-	Petroselinum crispum	MYB binding site involved in light responsiveness
BnaA02NPF2.23	DRE1	ACCGAGA	1048	7	-	Zea mays
BnaA02NPF2.23	ABRE	ACGTG	1398	5	-	Arabidopsis thaliana	cis-acting element involved in the abscisic acid responsiveness
BnaA02NPF2.23	ABRE	ACGTG	1542	5	+	Arabidopsis thaliana	cis-acting element involved in the abscisic acid responsiveness
BnaA02NPF2.23	STRE	AGGGG	1407	5	+	Arabidopsis thaliana
BnaA02NPF2.23	ATC-motif	AGTAATCT	1093	8	-	Spinacia oleracea	part of a conserved DNA module involved in light responsiveness
BnaA02NPF2.23	ATC-motif	AGTAATCT	1670	8	-	Spinacia oleracea	part of a conserved DNA module involved in light responsiveness
BnaA02NPF2.23	TATA-box	ATATAA	743	6	+	Brassica oleracea	core promoter element around -30 of transcription start
BnaA02NPF2.23	TATA-box	ATATAA	1426	6	+	Brassica oleracea	core promoter element around -30 of transcription start
BnaA02NPF2.23	TATA-box	ATATAA	1664	6	+	Brassica oleracea	core promoter element around -30 of transcription start
BnaA02NPF2.23	TATA-box	ATATAT	52	6	+	Brassica napus	core promoter element around -30 of transcription start
BnaA02NPF2.23	TATA-box	ATATAT	1083	6	-	Brassica napus	core promoter element around -30 of transcription start
BnaA02NPF2.23	TATA-box	ATATAT	1085	6	-	Brassica napus	core promoter element around -30 of transcription start
BnaA02NPF2.23	TATA-box	ATATAT	1087	6	-	Brassica napus	core promoter element around -30 of transcription start
BnaA02NPF2.23	TATA-box	ATATAT	1507	6	-	Brassica napus	core promoter element around -30 of transcription start
BnaA02NPF2.23	TATA-box	ATATAT	1923	6	-	Brassica napus	core promoter element around -30 of transcription start
BnaA02NPF2.23	Box 4	ATTAAT	1750	6	-	Petroselinum crispum	part of a conserved DNA module involved in light responsiveness
BnaA02NPF2.23	TATA-box	ATTATA	1936	6	+	Brassica napus	core promoter element around -30 of transcription start
BnaA02NPF2.23	CAAT-box	CAAAT	387	5	-	Pisum sativum	common cis-acting element in promoter and enhancer regions
BnaA02NPF2.23	CAAT-box	CAAAT	609	5	+	Pisum sativum	common cis-acting element in promoter and enhancer regions
BnaA02NPF2.23	CAAT-box	CAAAT	736	5	-	Pisum sativum	common cis-acting element in promoter and enhancer regions
BnaA02NPF2.23	CAAT-box	CAAAT	839	5	+	Pisum sativum	common cis-acting element in promoter and enhancer regions
BnaA02NPF2.23	CAAT-box	CAAAT	1231	5	-	Pisum sativum	common cis-acting element in promoter and enhancer regions
BnaA02NPF2.23	CAAT-box	CAAAT	1273	5	+	Pisum sativum	common cis-acting element in promoter and enhancer regions
BnaA02NPF2.23	CAAT-box	CAAAT	1651	5	-	Pisum sativum	common cis-acting element in promoter and enhancer regions
BnaA02NPF2.23	CAAT-box	CAAAT	1804	5	+	Pisum sativum	common cis-acting element in promoter and enhancer regions
BnaA02NPF2.23	CAAT-box	CAAAT	1915	5	-	Pisum sativum	common cis-acting element in promoter and enhancer regions
BnaA02NPF2.23	MYB	CAACAG	1458	6	+	Arabidopsis thaliana
BnaA02NPF2.23	Myb-binding site	CAACAG	1458	6	+	Nicotiana tabacum
BnaA02NPF2.23	MYB	CAACCA	1414	6	+	Arabidopsis thaliana
BnaA02NPF2.23	MYB	CAACCA	1716	6	-	Arabidopsis thaliana
BnaA02NPF2.23	CCAAT-box	CAACGG	1062	6	+	Hordeum vulgare	MYBHv1 binding site
BnaA02NPF2.23	Myb	CAACTG	1312	6	+	Arabidopsis thaliana
BnaA02NPF2.23	MBS	CAACTG	1312	6	+	Arabidopsis thaliana	MYB binding site involved in drought-inducibility
BnaA02NPF2.23	CAAT-box	CAAT	14	4	+	Nicotiana glutinosa
BnaA02NPF2.23	CAAT-box	CAAT	93	4	-	Nicotiana glutinosa
BnaA02NPF2.23	CAAT-box	CAAT	138	4	-	Nicotiana glutinosa
BnaA02NPF2.23	CAAT-box	CAAT	169	4	-	Nicotiana glutinosa
BnaA02NPF2.23	CAAT-box	CAAT	238	4	-	Nicotiana glutinosa
BnaA02NPF2.23	CAAT-box	CAAT	329	4	+	Nicotiana glutinosa
BnaA02NPF2.23	CAAT-box	CAAT	470	4	+	Nicotiana glutinosa
BnaA02NPF2.23	CAAT-box	CAAT	477	4	+	Nicotiana glutinosa
BnaA02NPF2.23	CAAT-box	CAAT	496	4	+	Nicotiana glutinosa
BnaA02NPF2.23	CAAT-box	CAAT	542	4	+	Nicotiana glutinosa
BnaA02NPF2.23	CAAT-box	CAAT	547	4	-	Nicotiana glutinosa
BnaA02NPF2.23	CAAT-box	CAAT	760	4	-	Nicotiana glutinosa
BnaA02NPF2.23	CAAT-box	CAAT	865	4	+	Nicotiana glutinosa
BnaA02NPF2.23	CAAT-box	CAAT	882	4	+	Nicotiana glutinosa
BnaA02NPF2.23	CAAT-box	CAAT	1331	4	-	Nicotiana glutinosa
BnaA02NPF2.23	CAAT-box	CAAT	1478	4	+	Nicotiana glutinosa
BnaA02NPF2.23	CAAT-box	CAAT	1560	4	+	Nicotiana glutinosa
BnaA02NPF2.23	CAAT-box	CAAT	1746	4	-	Nicotiana glutinosa
BnaA02NPF2.23	CAAT-box	CAAT	1908	4	-	Nicotiana glutinosa
BnaA02NPF2.23	HD-Zip 1	CAAT(A/T)ATTG	542	8.5	+	Arabidopsis thaliana	element involved in differentiation of the palisade mesophyll cells
BnaA02NPF2.23	G-box	CACGAC	1623	6	-	Zea mays	cis-acting regulatory element involved in light responsiveness
BnaA02NPF2.23	ABRE	CACGTG	1541	6	-	Arabidopsis thaliana	cis-acting element involved in the abscisic acid responsiveness
BnaA02NPF2.23	G-Box	CACGTG	1541	6	-	Pisum sativum	cis-acting regulatory element involved in light responsiveness
BnaA02NPF2.23	G-box	CACGTG	1541	6	-	Arabidopsis thaliana	cis-acting regulatory element involved in light responsiveness
BnaA02NPF2.23	G-Box	CACGTT	1398	6	+	Pisum sativum	cis-acting regulatory element involved in light responsiveness
BnaA02NPF2.23	MYC	CATGTG	26	6	-	Arabidopsis thaliana
BnaA02NPF2.23	MYC	CATGTG	639	6	-	Arabidopsis thaliana
BnaA02NPF2.23	MYC	CATGTG	641	6	+	Arabidopsis thaliana
BnaA02NPF2.23	MYC	CATTTG	386	6	+	Arabidopsis thaliana
BnaA02NPF2.23	MYC	CATTTG	839	6	-	Arabidopsis thaliana
BnaA02NPF2.23	MYC	CATTTG	1914	6	+	Arabidopsis thaliana
BnaA02NPF2.23	CAAT-box	CCAAT	407	5	-	Arabidopsis thaliana	common cis-acting element in promoter and enhancer regions
BnaA02NPF2.23	CAAT-box	CCAAT	541	5	+	Arabidopsis thaliana	common cis-acting element in promoter and enhancer regions
BnaA02NPF2.23	CAAT-box	CCAAT	824	5	-	Arabidopsis thaliana	common cis-acting element in promoter and enhancer regions
BnaA02NPF2.23	CAAT-box	CCAAT	1187	5	-	Arabidopsis thaliana	common cis-acting element in promoter and enhancer regions
BnaA02NPF2.23	CAAT-box	CCAAT	1222	5	-	Arabidopsis thaliana	common cis-acting element in promoter and enhancer regions
BnaA02NPF2.23	WRE3	CCACCT	1713	6	-	Pisum sativum
BnaA02NPF2.23	MYB recognition site	CCGTTG	1062	6	-	Arabidopsis thaliana
BnaA02NPF2.23	TATA-box	ccTATAAAaa	1207	9	+	Arabidopsis thaliana	core promoter element around -30 of transcription start
BnaA02NPF2.23	P-box	CCTTTTG	317	7	+	Oryza sativa	gibberellin-responsive element
BnaA02NPF2.23	P-box	CCTTTTG	1809	7	+	Oryza sativa	gibberellin-responsive element
BnaA02NPF2.23	Unnamed__1	CGTGG	1540	5	-	Zea mays
BnaA02NPF2.23	Unnamed__4	CTCC	58	4	+	Petroselinum hortense
BnaA02NPF2.23	Unnamed__4	CTCC	273	4	-	Petroselinum hortense
BnaA02NPF2.23	Unnamed__4	CTCC	724	4	-	Petroselinum hortense
BnaA02NPF2.23	Unnamed__4	CTCC	774	4	+	Petroselinum hortense
BnaA02NPF2.23	Unnamed__4	CTCC	827	4	-	Petroselinum hortense
BnaA02NPF2.23	Unnamed__4	CTCC	1010	4	-	Petroselinum hortense
BnaA02NPF2.23	Unnamed__4	CTCC	1066	4	-	Petroselinum hortense
BnaA02NPF2.23	Unnamed__4	CTCC	1982	4	+	Petroselinum hortense
BnaA02NPF2.23	AAGAA-motif	GAAAGAA	102	7	-	Avena sativa
BnaA02NPF2.23	AAGAA-motif	GAAAGAA	518	7	+	Avena sativa
BnaA02NPF2.23	CAT-box	GCCACT	1571	6	-	Arabidopsis thaliana	cis-acting regulatory element related to meristem expression
BnaA02NPF2.23	TC-rich repeats	GTTTTCTTAC	1991	9	+	Nicotiana tabacum	cis-acting element involved in defense and stress responsiveness
BnaA02NPF2.23	G-box	TAAACGTG	1398	8	-	Brassica oleracea	cis-acting regulatory element involved in light responsiveness
BnaA02NPF2.23	TATA-box	TAAAGATT	164	8	+	Arabidopsis thaliana	core promoter element around -30 of transcription start
BnaA02NPF2.23	TATA-box	TAAAGATT	1667	8	+	Arabidopsis thaliana	core promoter element around -30 of transcription start
BnaA02NPF2.23	TATA-box	TACATAAA	569	8	+	Oryza sativa	core promoter element around -30 of transcription start
BnaA02NPF2.23	TATA-box	TATA	53	4	+	Arabidopsis thaliana	core promoter element around -30 of transcription start
BnaA02NPF2.23	TATA-box	TATA	744	4	+	Arabidopsis thaliana	core promoter element around -30 of transcription start
BnaA02NPF2.23	TATA-box	TATA	1090	4	-	Arabidopsis thaliana	core promoter element around -30 of transcription start
BnaA02NPF2.23	TATA-box	TATA	1336	4	-	Arabidopsis thaliana	core promoter element around -30 of transcription start
BnaA02NPF2.23	TATA-box	TATA	1427	4	-	Arabidopsis thaliana	core promoter element around -30 of transcription start
BnaA02NPF2.23	TATA-box	TATA	1447	4	-	Arabidopsis thaliana	core promoter element around -30 of transcription start
BnaA02NPF2.23	TATA-box	TATA	1510	4	-	Arabidopsis thaliana	core promoter element around -30 of transcription start
BnaA02NPF2.23	TATA-box	TATA	1615	4	-	Arabidopsis thaliana	core promoter element around -30 of transcription start
BnaA02NPF2.23	TATA-box	TATA	1648	4	-	Arabidopsis thaliana	core promoter element around -30 of transcription start
BnaA02NPF2.23	TATA-box	TATA	1665	4	-	Arabidopsis thaliana	core promoter element around -30 of transcription start
BnaA02NPF2.23	TATA-box	TATA	1710	4	-	Arabidopsis thaliana	core promoter element around -30 of transcription start
BnaA02NPF2.23	TATA-box	TATA	1743	4	-	Arabidopsis thaliana	core promoter element around -30 of transcription start
BnaA02NPF2.23	TATA-box	TATA	1926	4	-	Arabidopsis thaliana	core promoter element around -30 of transcription start
BnaA02NPF2.23	TATA-box	TATA	1938	4	-	Arabidopsis thaliana	core promoter element around -30 of transcription start
BnaA02NPF2.23	TATA-box	TATAA	1937	5	-	Arabidopsis thaliana	core promoter element around -30 of transcription start
BnaA02NPF2.23	TATA-box	TATAAA	1080	6	-	Helianthus annuus	core promoter element around -30 of transcription start
BnaA02NPF2.23	TATA-box	TATAAA	1661	6	-	Helianthus annuus	core promoter element around -30 of transcription start
BnaA02NPF2.23	TATA-box	TATAAAA	1660	7	-	Pisum sativum	core promoter element around -30 of transcription start
BnaA02NPF2.23	TATA	TATAAAAT	1659	8	-	Arabidopsis thaliana
BnaA02NPF2.23	TATA-box	TATAAAT	1079	7	-	Brassica juncea	core promoter element around -30 of transcription start
BnaA02NPF2.23	AT~TATA-box	TATATA	742	6	+	Arabidopsis thaliana
BnaA02NPF2.23	AT~TATA-box	TATATA	1082	6	-	Arabidopsis thaliana
BnaA02NPF2.23	AT~TATA-box	TATATA	1084	6	-	Arabidopsis thaliana
BnaA02NPF2.23	AT~TATA-box	TATATA	1086	6	-	Arabidopsis thaliana
BnaA02NPF2.23	AT~TATA-box	TATATA	1088	6	-	Arabidopsis thaliana
BnaA02NPF2.23	AT~TATA-box	TATATA	1506	6	-	Arabidopsis thaliana
BnaA02NPF2.23	AT~TATA-box	TATATA	1508	6	-	Arabidopsis thaliana
BnaA02NPF2.23	AT~TATA-box	TATATA	1663	6	-	Arabidopsis thaliana
BnaA02NPF2.23	AT~TATA-box	TATATA	1922	6	-	Arabidopsis thaliana
BnaA02NPF2.23	AT~TATA-box	TATATA	1924	6	-	Arabidopsis thaliana
BnaA02NPF2.23	TATA-box	TATATA	742	6	+	Arabidopsis thaliana	core promoter element around -30 of transcription start
BnaA02NPF2.23	TATA-box	TATATA	1082	6	-	Arabidopsis thaliana	core promoter element around -30 of transcription start
BnaA02NPF2.23	TATA-box	TATATA	1084	6	-	Arabidopsis thaliana	core promoter element around -30 of transcription start
BnaA02NPF2.23	TATA-box	TATATA	1086	6	-	Arabidopsis thaliana	core promoter element around -30 of transcription start
BnaA02NPF2.23	TATA-box	TATATA	1088	6	-	Arabidopsis thaliana	core promoter element around -30 of transcription start
BnaA02NPF2.23	TATA-box	TATATA	1506	6	-	Arabidopsis thaliana	core promoter element around -30 of transcription start
BnaA02NPF2.23	TATA-box	TATATA	1508	6	-	Arabidopsis thaliana	core promoter element around -30 of transcription start
BnaA02NPF2.23	TATA-box	TATATA	1663	6	-	Arabidopsis thaliana	core promoter element around -30 of transcription start
BnaA02NPF2.23	TATA-box	TATATA	1922	6	-	Arabidopsis thaliana	core promoter element around -30 of transcription start
BnaA02NPF2.23	TATA-box	TATATA	1924	6	-	Arabidopsis thaliana	core promoter element around -30 of transcription start
BnaA02NPF2.23	TATA-box	TATATAA	741	7	-	Arabidopsis thaliana	core promoter element around -30 of transcription start
BnaA02NPF2.23	TATA-box	TATATAA	1081	7	-	Arabidopsis thaliana	core promoter element around -30 of transcription start
BnaA02NPF2.23	TATA-box	TATATAA	1505	7	-	Arabidopsis thaliana	core promoter element around -30 of transcription start
BnaA02NPF2.23	TATA-box	TATATAA	1662	7	-	Arabidopsis thaliana	core promoter element around -30 of transcription start
BnaA02NPF2.23	TATA-box	TATATAA	1921	7	-	Arabidopsis thaliana	core promoter element around -30 of transcription start
BnaA02NPF2.23	AT~TATA-box	TATATAAA	1080	8	-	Arabidopsis thaliana
BnaA02NPF2.23	AT~TATA-box	TATATAAA	1661	8	-	Arabidopsis thaliana
BnaA02NPF2.23	TATA-box	taTATAAAtc	1078	9	-	Arabidopsis thaliana	core promoter element around -30 of transcription start
BnaA02NPF2.23	TCA-element	TCAGAAGAGG	1838	9	+	Brassica oleracea	cis-acting element involved in salicylic acid responsiveness
BnaA02NPF2.23	W box	TTGACC	139	6	+	Arabidopsis thaliana
BnaA02NPF2.23	W box	TTGACC	1262	6	-	Arabidopsis thaliana
BnaA02NPF3.3	ARE	AAACCA	6	6	-	Zea mays	cis-acting regulatory element essential for the anaerobic induction
BnaA02NPF3.3	ARE	AAACCA	97	6	-	Zea mays	cis-acting regulatory element essential for the anaerobic induction
BnaA02NPF3.3	ARE	AAACCA	1778	6	+	Zea mays	cis-acting regulatory element essential for the anaerobic induction
BnaA02NPF3.3	ARE	AAACCA	1788	6	-	Zea mays	cis-acting regulatory element essential for the anaerobic induction
BnaA02NPF3.3	ARE	AAACCA	1882	6	+	Zea mays	cis-acting regulatory element essential for the anaerobic induction
BnaA02NPF3.3	WUN-motif	AAATTACT	1872	8	-	Nicotiana glutinosa
BnaA02NPF3.3	WUN-motif	AAATTACTA	1871	9	-	Nicotiana glutinosa
BnaA02NPF3.3	GATA-motif	AAGATAAGATT	71	10	-	Arabidopsis thaliana	part of a light responsive element
BnaA02NPF3.3	ABRE	ACGTG	1284	5	+	Arabidopsis thaliana	cis-acting element involved in the abscisic acid responsiveness
BnaA02NPF3.3	STRE	AGGGG	1908	5	-	Arabidopsis thaliana
BnaA02NPF3.3	TATA-box	ATATAA	184	6	+	Brassica oleracea	core promoter element around -30 of transcription start
BnaA02NPF3.3	TATA-box	ATATAA	470	6	+	Brassica oleracea	core promoter element around -30 of transcription start
BnaA02NPF3.3	TATA-box	ATATAA	1064	6	+	Brassica oleracea	core promoter element around -30 of transcription start
BnaA02NPF3.3	TATA-box	ATATAA	1082	6	+	Brassica oleracea	core promoter element around -30 of transcription start
BnaA02NPF3.3	TATA-box	ATATAT	196	6	+	Brassica napus	core promoter element around -30 of transcription start
BnaA02NPF3.3	TATA-box	ATATAT	198	6	+	Brassica napus	core promoter element around -30 of transcription start
BnaA02NPF3.3	TATA-box	ATATAT	200	6	+	Brassica napus	core promoter element around -30 of transcription start
BnaA02NPF3.3	TATA-box	ATATAT	405	6	+	Brassica napus	core promoter element around -30 of transcription start
BnaA02NPF3.3	TATA-box	ATATAT	407	6	+	Brassica napus	core promoter element around -30 of transcription start
BnaA02NPF3.3	TATA-box	ATATAT	409	6	+	Brassica napus	core promoter element around -30 of transcription start
BnaA02NPF3.3	TATA-box	ATATAT	411	6	+	Brassica napus	core promoter element around -30 of transcription start
BnaA02NPF3.3	TATA-box	ATATAT	413	6	+	Brassica napus	core promoter element around -30 of transcription start
BnaA02NPF3.3	TATA-box	ATATAT	447	6	+	Brassica napus	core promoter element around -30 of transcription start
BnaA02NPF3.3	TATA-box	ATATAT	449	6	+	Brassica napus	core promoter element around -30 of transcription start
BnaA02NPF3.3	TATA-box	ATATAT	565	6	+	Brassica napus	core promoter element around -30 of transcription start
BnaA02NPF3.3	Box 4	ATTAAT	676	6	+	Petroselinum crispum	part of a conserved DNA module involved in light responsiveness
BnaA02NPF3.3	Box 4	ATTAAT	686	6	+	Petroselinum crispum	part of a conserved DNA module involved in light responsiveness
BnaA02NPF3.3	TATA-box	ATTATA	49	6	+	Brassica napus	core promoter element around -30 of transcription start
BnaA02NPF3.3	TATA-box	ATTATA	209	6	+	Brassica napus	core promoter element around -30 of transcription start
BnaA02NPF3.3	TATA-box	ATTATA	444	6	+	Brassica napus	core promoter element around -30 of transcription start
BnaA02NPF3.3	TATA-box	ATTATA	562	6	+	Brassica napus	core promoter element around -30 of transcription start
BnaA02NPF3.3	TATA-box	ATTATA	587	6	+	Brassica napus	core promoter element around -30 of transcription start
BnaA02NPF3.3	TATA-box	ATTATA	1045	6	+	Brassica napus	core promoter element around -30 of transcription start
BnaA02NPF3.3	TATA-box	ATTATA	1079	6	+	Brassica napus	core promoter element around -30 of transcription start
BnaA02NPF3.3	TATA-box	ATTATA	1096	6	+	Brassica napus	core promoter element around -30 of transcription start
BnaA02NPF3.3	ERE	ATTTTAAA	303	8	-	Nicotiana glutinos
BnaA02NPF3.3	ERE	ATTTTAAA	426	8	+	Nicotiana glutinos
BnaA02NPF3.3	ERE	ATTTTAAA	477	8	+	Nicotiana glutinos
BnaA02NPF3.3	ERE	ATTTTAAA	516	8	+	Nicotiana glutinos
BnaA02NPF3.3	ERE	ATTTTAAA	518	8	-	Nicotiana glutinos
BnaA02NPF3.3	ERE	ATTTTAAA	603	8	+	Nicotiana glutinos
BnaA02NPF3.3	ERE	ATTTTAAA	628	8	+	Nicotiana glutinos
BnaA02NPF3.3	CAAT-box	CAAAT	3	5	-	Pisum sativum	common cis-acting element in promoter and enhancer regions
BnaA02NPF3.3	CAAT-box	CAAAT	94	5	-	Pisum sativum	common cis-acting element in promoter and enhancer regions
BnaA02NPF3.3	CAAT-box	CAAAT	150	5	-	Pisum sativum	common cis-acting element in promoter and enhancer regions
BnaA02NPF3.3	CAAT-box	CAAAT	224	5	-	Pisum sativum	common cis-acting element in promoter and enhancer regions
BnaA02NPF3.3	CAAT-box	CAAAT	232	5	-	Pisum sativum	common cis-acting element in promoter and enhancer regions
BnaA02NPF3.3	CAAT-box	CAAAT	259	5	-	Pisum sativum	common cis-acting element in promoter and enhancer regions
BnaA02NPF3.3	CAAT-box	CAAAT	555	5	+	Pisum sativum	common cis-acting element in promoter and enhancer regions
BnaA02NPF3.3	CAAT-box	CAAAT	844	5	-	Pisum sativum	common cis-acting element in promoter and enhancer regions
BnaA02NPF3.3	CAAT-box	CAAAT	897	5	+	Pisum sativum	common cis-acting element in promoter and enhancer regions
BnaA02NPF3.3	CAAT-box	CAAAT	951	5	+	Pisum sativum	common cis-acting element in promoter and enhancer regions
BnaA02NPF3.3	CAAT-box	CAAAT	1114	5	-	Pisum sativum	common cis-acting element in promoter and enhancer regions
BnaA02NPF3.3	CAAT-box	CAAAT	1343	5	-	Pisum sativum	common cis-acting element in promoter and enhancer regions
BnaA02NPF3.3	CAAT-box	CAAAT	1451	5	+	Pisum sativum	common cis-acting element in promoter and enhancer regions
BnaA02NPF3.3	CAAT-box	CAAAT	1782	5	+	Pisum sativum	common cis-acting element in promoter and enhancer regions
BnaA02NPF3.3	CAAT-box	CAAAT	1795	5	-	Pisum sativum	common cis-acting element in promoter and enhancer regions
BnaA02NPF3.3	CAAT-box	CAAAT	1876	5	-	Pisum sativum	common cis-acting element in promoter and enhancer regions
BnaA02NPF3.3	MYB	CAACCA	935	6	-	Arabidopsis thaliana
BnaA02NPF3.3	Myb	CAACTG	931	6	+	Arabidopsis thaliana
BnaA02NPF3.3	MBS	CAACTG	931	6	+	Arabidopsis thaliana	MYB binding site involved in drought-inducibility
BnaA02NPF3.3	CAAT-box	CAAT	204	4	-	Nicotiana glutinosa
BnaA02NPF3.3	CAAT-box	CAAT	214	4	-	Nicotiana glutinosa
BnaA02NPF3.3	CAAT-box	CAAT	247	4	+	Nicotiana glutinosa
BnaA02NPF3.3	CAAT-box	CAAT	353	4	-	Nicotiana glutinosa
BnaA02NPF3.3	CAAT-box	CAAT	461	4	-	Nicotiana glutinosa
BnaA02NPF3.3	CAAT-box	CAAT	593	4	-	Nicotiana glutinosa
BnaA02NPF3.3	CAAT-box	CAAT	693	4	+	Nicotiana glutinosa
BnaA02NPF3.3	CAAT-box	CAAT	835	4	+	Nicotiana glutinosa
BnaA02NPF3.3	CAAT-box	CAAT	961	4	-	Nicotiana glutinosa
BnaA02NPF3.3	CAAT-box	CAAT	1147	4	+	Nicotiana glutinosa
BnaA02NPF3.3	CAAT-box	CAAT	1173	4	+	Nicotiana glutinosa
BnaA02NPF3.3	CAAT-box	CAAT	1431	4	-	Nicotiana glutinosa
BnaA02NPF3.3	CAAT-box	CAAT	1493	4	+	Nicotiana glutinosa
BnaA02NPF3.3	CAAT-box	CAAT	1500	4	-	Nicotiana glutinosa
BnaA02NPF3.3	CAAT-box	CAAT	1582	4	-	Nicotiana glutinosa
BnaA02NPF3.3	CAAT-box	CAAT	1596	4	+	Nicotiana glutinosa
BnaA02NPF3.3	CAAT-box	CAAT	1632	4	+	Nicotiana glutinosa
BnaA02NPF3.3	CAAT-box	CAAT	1733	4	+	Nicotiana glutinosa
BnaA02NPF3.3	ABRE4	CACGTA	1283	6	-	Zea mays
BnaA02NPF3.3	MYC	CATGTG	123	6	+	Arabidopsis thaliana
BnaA02NPF3.3	MYC	CATTTG	93	6	+	Arabidopsis thaliana
BnaA02NPF3.3	MYC	CATTTG	1342	6	+	Arabidopsis thaliana
BnaA02NPF3.3	CAAT-box	CCAAT	37	5	-	Arabidopsis thaliana	common cis-acting element in promoter and enhancer regions
BnaA02NPF3.3	WRE3	CCACCT	1269	6	+	Pisum sativum
BnaA02NPF3.3	WUN-motif	CCATTTCAA	938	9	-	Nicotiana glutinosa
BnaA02NPF3.3	TATA-box	ccTATAAAaa	667	9	-	Arabidopsis thaliana	core promoter element around -30 of transcription start
BnaA02NPF3.3	TATA-box	ccTATAAAaa	1893	9	+	Arabidopsis thaliana	core promoter element around -30 of transcription start
BnaA02NPF3.3	CGTCA-motif	CGTCA	1818	5	+	Hordeum vulgare	cis-acting regulatory element involved in the MeJA-responsiveness
BnaA02NPF3.3	Unnamed__4	CTCC	853	4	+	Petroselinum hortense
BnaA02NPF3.3	Unnamed__4	CTCC	861	4	-	Petroselinum hortense
BnaA02NPF3.3	Unnamed__4	CTCC	945	4	-	Petroselinum hortense
BnaA02NPF3.3	Unnamed__4	CTCC	1206	4	-	Petroselinum hortense
BnaA02NPF3.3	CAT-box	GCCACT	1857	6	+	Arabidopsis thaliana	cis-acting regulatory element related to meristem expression
BnaA02NPF3.3	GT1-motif	GGTTAA	550	6	-	Arabidopsis thaliana	light responsive element
BnaA02NPF3.3	GT1-motif	GGTTAA	1128	6	+	Arabidopsis thaliana	light responsive element
BnaA02NPF3.3	GT1-motif	GGTTAAT	1913	7	+	Avena sativa	light responsive element
BnaA02NPF3.3	O2-site	GTTGACGTGA	964	9	+	Zea mays	cis-acting regulatory element involved in zein metabolism regulation
BnaA02NPF3.3	AT-rich sequence	TAAAATACT	625	9	-	Pisum sativum	element for maximal elicitor-mediated activation (2copies)
BnaA02NPF3.3	MYB	TAACCA	551	6	+	Arabidopsis thaliana
BnaA02NPF3.3	MYB	TAACCA	1127	6	-	Arabidopsis thaliana
BnaA02NPF3.3	MYB	TAACCA	1912	6	-	Arabidopsis thaliana
BnaA02NPF3.3	MYB-like sequence	TAACCA	551	6	+	Arabidopsis thaliana
BnaA02NPF3.3	MYB-like sequence	TAACCA	1127	6	-	Arabidopsis thaliana
BnaA02NPF3.3	MYB-like sequence	TAACCA	1912	6	-	Arabidopsis thaliana
BnaA02NPF3.3	Myb	TAACTG	901	6	+	Arabidopsis thaliana
BnaA02NPF3.3	TATA-box	TACAAAA	9	7	-	Oryza sativa	core promoter element around -30 of transcription start
BnaA02NPF3.3	TATA-box	TACAAAA	100	7	-	Oryza sativa	core promoter element around -30 of transcription start
BnaA02NPF3.3	TATA-box	TACATAAA	1956	8	+	Oryza sativa	core promoter element around -30 of transcription start
BnaA02NPF3.3	ABRE3a	TACGTG	1283	6	+	Zea mays
BnaA02NPF3.3	G-box	TACGTG	1283	6	+	Arabidopsis thaliana	cis-acting regulatory element involved in light responsiveness
BnaA02NPF3.3	TATA-box	TATA	51	4	+	Arabidopsis thaliana	core promoter element around -30 of transcription start
BnaA02NPF3.3	TATA-box	TATA	185	4	+	Arabidopsis thaliana	core promoter element around -30 of transcription start
BnaA02NPF3.3	TATA-box	TATA	201	4	+	Arabidopsis thaliana	core promoter element around -30 of transcription start
BnaA02NPF3.3	TATA-box	TATA	211	4	+	Arabidopsis thaliana	core promoter element around -30 of transcription start
BnaA02NPF3.3	TATA-box	TATA	416	4	+	Arabidopsis thaliana	core promoter element around -30 of transcription start
BnaA02NPF3.3	TATA-box	TATA	450	4	+	Arabidopsis thaliana	core promoter element around -30 of transcription start
BnaA02NPF3.3	TATA-box	TATA	471	4	+	Arabidopsis thaliana	core promoter element around -30 of transcription start
BnaA02NPF3.3	TATA-box	TATA	493	4	+	Arabidopsis thaliana	core promoter element around -30 of transcription start
BnaA02NPF3.3	TATA-box	TATA	566	4	+	Arabidopsis thaliana	core promoter element around -30 of transcription start
BnaA02NPF3.3	TATA-box	TATA	589	4	+	Arabidopsis thaliana	core promoter element around -30 of transcription start
BnaA02NPF3.3	TATA-box	TATA	671	4	+	Arabidopsis thaliana	core promoter element around -30 of transcription start
BnaA02NPF3.3	TATA-box	TATA	820	4	+	Arabidopsis thaliana	core promoter element around -30 of transcription start
BnaA02NPF3.3	TATA-box	TATA	1049	4	-	Arabidopsis thaliana	core promoter element around -30 of transcription start
BnaA02NPF3.3	TATA-box	TATA	1065	4	-	Arabidopsis thaliana	core promoter element around -30 of transcription start
BnaA02NPF3.3	TATA-box	TATA	1083	4	-	Arabidopsis thaliana	core promoter element around -30 of transcription start
BnaA02NPF3.3	TATA-box	TATA	1100	4	-	Arabidopsis thaliana	core promoter element around -30 of transcription start
BnaA02NPF3.3	TATA-box	TATA	1109	4	-	Arabidopsis thaliana	core promoter element around -30 of transcription start
BnaA02NPF3.3	TATA-box	TATA	1140	4	-	Arabidopsis thaliana	core promoter element around -30 of transcription start
BnaA02NPF3.3	TATA-box	TATA	1289	4	-	Arabidopsis thaliana	core promoter element around -30 of transcription start
BnaA02NPF3.3	TATA-box	TATA	1812	4	-	Arabidopsis thaliana	core promoter element around -30 of transcription start
BnaA02NPF3.3	TATA-box	TATA	1837	4	-	Arabidopsis thaliana	core promoter element around -30 of transcription start
BnaA02NPF3.3	TATA-box	TATA	1895	4	-	Arabidopsis thaliana	core promoter element around -30 of transcription start
BnaA02NPF3.3	TATA-box	TATA	1901	4	-	Arabidopsis thaliana	core promoter element around -30 of transcription start
BnaA02NPF3.3	TATA-box	TATAA	50	5	-	Arabidopsis thaliana	core promoter element around -30 of transcription start
BnaA02NPF3.3	TATA-box	TATAA	210	5	-	Arabidopsis thaliana	core promoter element around -30 of transcription start
BnaA02NPF3.3	TATA-box	TATAA	492	5	-	Arabidopsis thaliana	core promoter element around -30 of transcription start
BnaA02NPF3.3	TATA-box	TATAA	588	5	-	Arabidopsis thaliana	core promoter element around -30 of transcription start
BnaA02NPF3.3	TATA-box	TATAA	670	5	-	Arabidopsis thaliana	core promoter element around -30 of transcription start
BnaA02NPF3.3	TATA-box	TATAA	819	5	-	Arabidopsis thaliana	core promoter element around -30 of transcription start
BnaA02NPF3.3	TATA-box	TATAA	1836	5	-	Arabidopsis thaliana	core promoter element around -30 of transcription start
BnaA02NPF3.3	TATA-box	TATAAA	491	6	-	Helianthus annuus	core promoter element around -30 of transcription start
BnaA02NPF3.3	TATA-box	TATAAA	669	6	-	Helianthus annuus	core promoter element around -30 of transcription start
BnaA02NPF3.3	TATA-box	TATAAA	818	6	-	Helianthus annuus	core promoter element around -30 of transcription start
BnaA02NPF3.3	TATA-box	TATAAA	1835	6	-	Helianthus annuus	core promoter element around -30 of transcription start
BnaA02NPF3.3	TATA-box	TATAAAA	668	7	-	Pisum sativum	core promoter element around -30 of transcription start
BnaA02NPF3.3	TATA-box	TATAAAA	817	7	-	Pisum sativum	core promoter element around -30 of transcription start
BnaA02NPF3.3	TATA	TATAAAAT	816	8	-	Arabidopsis thaliana
BnaA02NPF3.3	TATA-box	TATAAAT	490	7	-	Brassica juncea	core promoter element around -30 of transcription start
BnaA02NPF3.3	TATA-box	TATAAAT	1834	7	-	Brassica juncea	core promoter element around -30 of transcription start
BnaA02NPF3.3	Unnamed__6	taTAAATATct	486	10	-	Zea mays
BnaA02NPF3.3	TATA-box	TATACA	1287	6	-	Helianthus annuus	core promoter element around -30 of transcription start
BnaA02NPF3.3	AT~TATA-box	TATATA	197	6	+	Arabidopsis thaliana
BnaA02NPF3.3	AT~TATA-box	TATATA	199	6	+	Arabidopsis thaliana
BnaA02NPF3.3	AT~TATA-box	TATATA	406	6	+	Arabidopsis thaliana
BnaA02NPF3.3	AT~TATA-box	TATATA	408	6	+	Arabidopsis thaliana
BnaA02NPF3.3	AT~TATA-box	TATATA	410	6	+	Arabidopsis thaliana
BnaA02NPF3.3	AT~TATA-box	TATATA	412	6	+	Arabidopsis thaliana
BnaA02NPF3.3	AT~TATA-box	TATATA	414	6	+	Arabidopsis thaliana
BnaA02NPF3.3	AT~TATA-box	TATATA	446	6	+	Arabidopsis thaliana
BnaA02NPF3.3	AT~TATA-box	TATATA	448	6	+	Arabidopsis thaliana
BnaA02NPF3.3	AT~TATA-box	TATATA	564	6	+	Arabidopsis thaliana
BnaA02NPF3.3	AT~TATA-box	TATATA	1047	6	-	Arabidopsis thaliana
BnaA02NPF3.3	AT~TATA-box	TATATA	1081	6	-	Arabidopsis thaliana
BnaA02NPF3.3	AT~TATA-box	TATATA	1098	6	-	Arabidopsis thaliana
BnaA02NPF3.3	TATA-box	TATATA	197	6	+	Arabidopsis thaliana	core promoter element around -30 of transcription start
BnaA02NPF3.3	TATA-box	TATATA	199	6	+	Arabidopsis thaliana	core promoter element around -30 of transcription start
BnaA02NPF3.3	TATA-box	TATATA	406	6	+	Arabidopsis thaliana	core promoter element around -30 of transcription start
BnaA02NPF3.3	TATA-box	TATATA	408	6	+	Arabidopsis thaliana	core promoter element around -30 of transcription start
BnaA02NPF3.3	TATA-box	TATATA	410	6	+	Arabidopsis thaliana	core promoter element around -30 of transcription start
BnaA02NPF3.3	TATA-box	TATATA	412	6	+	Arabidopsis thaliana	core promoter element around -30 of transcription start
BnaA02NPF3.3	TATA-box	TATATA	414	6	+	Arabidopsis thaliana	core promoter element around -30 of transcription start
BnaA02NPF3.3	TATA-box	TATATA	446	6	+	Arabidopsis thaliana	core promoter element around -30 of transcription start
BnaA02NPF3.3	TATA-box	TATATA	448	6	+	Arabidopsis thaliana	core promoter element around -30 of transcription start
BnaA02NPF3.3	TATA-box	TATATA	564	6	+	Arabidopsis thaliana	core promoter element around -30 of transcription start
BnaA02NPF3.3	TATA-box	TATATA	1047	6	-	Arabidopsis thaliana	core promoter element around -30 of transcription start
BnaA02NPF3.3	TATA-box	TATATA	1081	6	-	Arabidopsis thaliana	core promoter element around -30 of transcription start
BnaA02NPF3.3	TATA-box	TATATA	1098	6	-	Arabidopsis thaliana	core promoter element around -30 of transcription start
BnaA02NPF3.3	TATA-box	TATATAA	445	7	-	Arabidopsis thaliana	core promoter element around -30 of transcription start
BnaA02NPF3.3	TATA-box	TATATAA	563	7	-	Arabidopsis thaliana	core promoter element around -30 of transcription start
BnaA02NPF3.3	TATA-box	TATATAA	1046	7	-	Arabidopsis thaliana	core promoter element around -30 of transcription start
BnaA02NPF3.3	TATA-box	TATATAA	1080	7	-	Arabidopsis thaliana	core promoter element around -30 of transcription start
BnaA02NPF3.3	TATA-box	TATATAA	1097	7	-	Arabidopsis thaliana	core promoter element around -30 of transcription start
BnaA02NPF3.3	TATA-box	taTATAAAtc	1572	9	-	Arabidopsis thaliana	core promoter element around -30 of transcription start
BnaA02NPF3.3	TATA-box	TATTTAAA	479	8	-	Arabidopsis thaliana	core promoter element around -30 of transcription start
BnaA02NPF3.3	TATA-box	TATTTAAA	572	8	-	Arabidopsis thaliana	core promoter element around -30 of transcription start
BnaA02NPF3.3	TATA-box	TATTTAAA	1612	8	-	Arabidopsis thaliana	core promoter element around -30 of transcription start
BnaA02NPF3.3	chs-CMA2a	TCACTTGA	785	8	+	Petroselinum crispum	part of a light responsive element
BnaA02NPF3.3	TGACG-motif	TGACG	1818	5	-	Hordeum vulgare	cis-acting regulatory element involved in the MeJA-responsiveness
BnaA02NPF3.3	as-1	TGACG	1818	5	-	Arabidopsis thaliana
BnaA02NPF5.11	ARE	AAACCA	352	6	-	Zea mays	cis-acting regulatory element essential for the anaerobic induction
BnaA02NPF5.11	ABRE	ACGTG	547	5	+	Arabidopsis thaliana	cis-acting element involved in the abscisic acid responsiveness
BnaA02NPF5.11	box S	AGCCACC	423	7	-	Arabidopsis thaliana
BnaA02NPF5.11	STRE	AGGGG	440	5	+	Arabidopsis thaliana
BnaA02NPF5.11	TATA-box	ATATAA	27	6	+	Brassica oleracea	core promoter element around -30 of transcription start
BnaA02NPF5.11	TATA-box	ATATAA	43	6	+	Brassica oleracea	core promoter element around -30 of transcription start
BnaA02NPF5.11	TATA-box	ATATAA	588	6	+	Brassica oleracea	core promoter element around -30 of transcription start
BnaA02NPF5.11	TATA-box	ATATAA	1064	6	+	Brassica oleracea	core promoter element around -30 of transcription start
BnaA02NPF5.11	TATA-box	ATATAA	1367	6	+	Brassica oleracea	core promoter element around -30 of transcription start
BnaA02NPF5.11	TATA-box	ATATAA	1934	6	+	Brassica oleracea	core promoter element around -30 of transcription start
BnaA02NPF5.11	TATA-box	ATATAT	64	6	+	Brassica napus	core promoter element around -30 of transcription start
BnaA02NPF5.11	TATA-box	ATATAT	238	6	+	Brassica napus	core promoter element around -30 of transcription start
BnaA02NPF5.11	TATA-box	ATATAT	414	6	+	Brassica napus	core promoter element around -30 of transcription start
BnaA02NPF5.11	TATA-box	ATATAT	982	6	+	Brassica napus	core promoter element around -30 of transcription start
BnaA02NPF5.11	TATA-box	ATATAT	1023	6	-	Brassica napus	core promoter element around -30 of transcription start
BnaA02NPF5.11	TATA-box	ATATAT	1050	6	-	Brassica napus	core promoter element around -30 of transcription start
BnaA02NPF5.11	TATA-box	ATATAT	1052	6	-	Brassica napus	core promoter element around -30 of transcription start
BnaA02NPF5.11	TATA-box	ATATAT	1251	6	-	Brassica napus	core promoter element around -30 of transcription start
BnaA02NPF5.11	TATA-box	ATATAT	1253	6	-	Brassica napus	core promoter element around -30 of transcription start
BnaA02NPF5.11	TATA-box	ATATAT	1344	6	-	Brassica napus	core promoter element around -30 of transcription start
BnaA02NPF5.11	TATA-box	ATATAT	1346	6	-	Brassica napus	core promoter element around -30 of transcription start
BnaA02NPF5.11	TATA-box	ATATAT	1387	6	-	Brassica napus	core promoter element around -30 of transcription start
BnaA02NPF5.11	TATA-box	ATATAT	1637	6	-	Brassica napus	core promoter element around -30 of transcription start
BnaA02NPF5.11	TATA-box	ATATAT	1647	6	-	Brassica napus	core promoter element around -30 of transcription start
BnaA02NPF5.11	TATA-box	ATATAT	1932	6	-	Brassica napus	core promoter element around -30 of transcription start
BnaA02NPF5.11	Box 4	ATTAAT	180	6	+	Petroselinum crispum	part of a conserved DNA module involved in light responsiveness
BnaA02NPF5.11	Box 4	ATTAAT	1236	6	-	Petroselinum crispum	part of a conserved DNA module involved in light responsiveness
BnaA02NPF5.11	Box 4	ATTAAT	1383	6	-	Petroselinum crispum	part of a conserved DNA module involved in light responsiveness
BnaA02NPF5.11	Box 4	ATTAAT	1439	6	-	Petroselinum crispum	part of a conserved DNA module involved in light responsiveness
BnaA02NPF5.11	Box 4	ATTAAT	1819	6	-	Petroselinum crispum	part of a conserved DNA module involved in light responsiveness
BnaA02NPF5.11	TATA-box	ATTATA	323	6	+	Brassica napus	core promoter element around -30 of transcription start
BnaA02NPF5.11	TATA-box	ATTATA	1297	6	+	Brassica napus	core promoter element around -30 of transcription start
BnaA02NPF5.11	TATA-box	ATTATA	1309	6	+	Brassica napus	core promoter element around -30 of transcription start
BnaA02NPF5.11	TC-rich repeats	ATTCTCTAAC	1605	9	-	Nicotiana tabacum	cis-acting element involved in defense and stress responsiveness
BnaA02NPF5.11	ERE	ATTTTAAA	1458	8	-	Nicotiana glutinos
BnaA02NPF5.11	ERE	ATTTTAAA	1651	8	+	Nicotiana glutinos
BnaA02NPF5.11	CAAT-box	CAAAT	8	5	-	Pisum sativum	common cis-acting element in promoter and enhancer regions
BnaA02NPF5.11	CAAT-box	CAAAT	98	5	+	Pisum sativum	common cis-acting element in promoter and enhancer regions
BnaA02NPF5.11	CAAT-box	CAAAT	224	5	-	Pisum sativum	common cis-acting element in promoter and enhancer regions
BnaA02NPF5.11	CAAT-box	CAAAT	253	5	-	Pisum sativum	common cis-acting element in promoter and enhancer regions
BnaA02NPF5.11	CAAT-box	CAAAT	278	5	-	Pisum sativum	common cis-acting element in promoter and enhancer regions
BnaA02NPF5.11	CAAT-box	CAAAT	1188	5	-	Pisum sativum	common cis-acting element in promoter and enhancer regions
BnaA02NPF5.11	CAAT-box	CAAAT	1480	5	-	Pisum sativum	common cis-acting element in promoter and enhancer regions
BnaA02NPF5.11	CAAT-box	CAAAT	1571	5	+	Pisum sativum	common cis-acting element in promoter and enhancer regions
BnaA02NPF5.11	CAAT-box	CAAAT	1598	5	+	Pisum sativum	common cis-acting element in promoter and enhancer regions
BnaA02NPF5.11	CAAT-box	CAAAT	1601	5	-	Pisum sativum	common cis-acting element in promoter and enhancer regions
BnaA02NPF5.11	CAAT-box	CAAAT	1803	5	+	Pisum sativum	common cis-acting element in promoter and enhancer regions
BnaA02NPF5.11	MYB	CAACCA	1793	6	-	Arabidopsis thaliana
BnaA02NPF5.11	CAAT-box	CAAT	197	4	+	Nicotiana glutinosa
BnaA02NPF5.11	CAAT-box	CAAT	495	4	-	Nicotiana glutinosa
BnaA02NPF5.11	CAAT-box	CAAT	997	4	-	Nicotiana glutinosa
BnaA02NPF5.11	CAAT-box	CAAT	1129	4	-	Nicotiana glutinosa
BnaA02NPF5.11	CAAT-box	CAAT	1176	4	+	Nicotiana glutinosa
BnaA02NPF5.11	CAAT-box	CAAT	1199	4	-	Nicotiana glutinosa
BnaA02NPF5.11	CAAT-box	CAAT	1234	4	+	Nicotiana glutinosa
BnaA02NPF5.11	CAAT-box	CAAT	1284	4	-	Nicotiana glutinosa
BnaA02NPF5.11	CAAT-box	CAAT	1509	4	+	Nicotiana glutinosa
BnaA02NPF5.11	CAAT-box	CAAT	1559	4	+	Nicotiana glutinosa
BnaA02NPF5.11	CAAT-box	CAAT	1715	4	-	Nicotiana glutinosa
BnaA02NPF5.11	CAAT-box	CAAT	1741	4	-	Nicotiana glutinosa
BnaA02NPF5.11	CAAT-box	CAAT	1760	4	+	Nicotiana glutinosa
BnaA02NPF5.11	CAAT-box	CAAT	1784	4	-	Nicotiana glutinosa
BnaA02NPF5.11	CAAT-box	CAAT	1790	4	+	Nicotiana glutinosa
BnaA02NPF5.11	CAAT-box	CAAT	1810	4	+	Nicotiana glutinosa
BnaA02NPF5.11	CAAT-box	CAAT	1823	4	-	Nicotiana glutinosa
BnaA02NPF5.11	CAAT-box	CAAT	1867	4	+	Nicotiana glutinosa
BnaA02NPF5.11	CAAT-box	CAAT	1887	4	-	Nicotiana glutinosa
BnaA02NPF5.11	G-box	CACGTC	546	6	-	Zea mays	cis-acting regulatory element involved in light responsiveness
BnaA02NPF5.11	MYC	CATGTG	773	6	+	Arabidopsis thaliana
BnaA02NPF5.11	CAAT-box	CCAAT	579	5	-	Arabidopsis thaliana	common cis-acting element in promoter and enhancer regions
BnaA02NPF5.11	CAAT-box	CCAAT	1082	5	-	Arabidopsis thaliana	common cis-acting element in promoter and enhancer regions
BnaA02NPF5.11	CAAT-box	CCAAT	1117	5	-	Arabidopsis thaliana	common cis-acting element in promoter and enhancer regions
BnaA02NPF5.11	CAAT-box	CCAAT	1302	5	-	Arabidopsis thaliana	common cis-acting element in promoter and enhancer regions
BnaA02NPF5.11	CAAT-box	CCAAT	1789	5	+	Arabidopsis thaliana	common cis-acting element in promoter and enhancer regions
BnaA02NPF5.11	TCA-element	CCATCTTTTT	1972	9	-	Nicotiana tabacum	cis-acting element involved in salicylic acid responsiveness
BnaA02NPF5.11	CGTCA-motif	CGTCA	208	5	+	Hordeum vulgare	cis-acting regulatory element involved in the MeJA-responsiveness
BnaA02NPF5.11	CGTCA-motif	CGTCA	545	5	-	Hordeum vulgare	cis-acting regulatory element involved in the MeJA-responsiveness
BnaA02NPF5.11	Unnamed__4	CTCC	582	4	-	Petroselinum hortense
BnaA02NPF5.11	Unnamed__4	CTCC	1585	4	-	Petroselinum hortense
BnaA02NPF5.11	Unnamed__4	CTCC	1990	4	-	Petroselinum hortense
BnaA02NPF5.11	Unnamed__4	CTCC	1994	4	-	Petroselinum hortense
BnaA02NPF5.11	AAGAA-motif	GAAAGAA	163	7	+	Avena sativa
BnaA02NPF5.11	AAGAA-motif	GAAAGAA	370	7	-	Avena sativa
BnaA02NPF5.11	AAGAA-motif	GAAAGAA	878	7	+	Avena sativa
BnaA02NPF5.11	GT1-motif	GGTTAAT	402	7	+	Avena sativa	light responsive element
BnaA02NPF5.11	GT1-motif	GGTTAAT	1850	7	+	Avena sativa	light responsive element
BnaA02NPF5.11	HD-Zip 3	GTAAT(G/C)ATTAC	1004	9.5	-	Arabidopsis thaliana	protein binding site
BnaA02NPF5.11	HD-Zip 3	GTAAT(G/C)ATTAC	1852	9.5	-	Arabidopsis thaliana	protein binding site
BnaA02NPF5.11	TATA-box	TAAAGATT	35	8	-	Arabidopsis thaliana	core promoter element around -30 of transcription start
BnaA02NPF5.11	TATA-box	TAAAGATT	1876	8	+	Arabidopsis thaliana	core promoter element around -30 of transcription start
BnaA02NPF5.11	TATA-box	TACAAAA	507	7	+	Oryza sativa	core promoter element around -30 of transcription start
BnaA02NPF5.11	TATA-box	TACAAAA	1265	7	+	Oryza sativa	core promoter element around -30 of transcription start
BnaA02NPF5.11	TATA-box	TACAAAA	1470	7	+	Oryza sativa	core promoter element around -30 of transcription start
BnaA02NPF5.11	TATA-box	TACATAAA	1870	8	-	Oryza sativa	core promoter element around -30 of transcription start
BnaA02NPF5.11	TATA-box	TATA	28	4	+	Arabidopsis thaliana	core promoter element around -30 of transcription start
BnaA02NPF5.11	TATA-box	TATA	44	4	+	Arabidopsis thaliana	core promoter element around -30 of transcription start
BnaA02NPF5.11	TATA-box	TATA	65	4	+	Arabidopsis thaliana	core promoter element around -30 of transcription start
BnaA02NPF5.11	TATA-box	TATA	91	4	+	Arabidopsis thaliana	core promoter element around -30 of transcription start
BnaA02NPF5.11	TATA-box	TATA	130	4	+	Arabidopsis thaliana	core promoter element around -30 of transcription start
BnaA02NPF5.11	TATA-box	TATA	152	4	+	Arabidopsis thaliana	core promoter element around -30 of transcription start
BnaA02NPF5.11	TATA-box	TATA	159	4	+	Arabidopsis thaliana	core promoter element around -30 of transcription start
BnaA02NPF5.11	TATA-box	TATA	239	4	+	Arabidopsis thaliana	core promoter element around -30 of transcription start
BnaA02NPF5.11	TATA-box	TATA	250	4	+	Arabidopsis thaliana	core promoter element around -30 of transcription start
BnaA02NPF5.11	TATA-box	TATA	260	4	+	Arabidopsis thaliana	core promoter element around -30 of transcription start
BnaA02NPF5.11	TATA-box	TATA	325	4	+	Arabidopsis thaliana	core promoter element around -30 of transcription start
BnaA02NPF5.11	TATA-box	TATA	343	4	+	Arabidopsis thaliana	core promoter element around -30 of transcription start
BnaA02NPF5.11	TATA-box	TATA	415	4	+	Arabidopsis thaliana	core promoter element around -30 of transcription start
BnaA02NPF5.11	TATA-box	TATA	528	4	+	Arabidopsis thaliana	core promoter element around -30 of transcription start
BnaA02NPF5.11	TATA-box	TATA	589	4	+	Arabidopsis thaliana	core promoter element around -30 of transcription start
BnaA02NPF5.11	TATA-box	TATA	779	4	+	Arabidopsis thaliana	core promoter element around -30 of transcription start
BnaA02NPF5.11	TATA-box	TATA	841	4	+	Arabidopsis thaliana	core promoter element around -30 of transcription start
BnaA02NPF5.11	TATA-box	TATA	856	4	+	Arabidopsis thaliana	core promoter element around -30 of transcription start
BnaA02NPF5.11	TATA-box	TATA	975	4	+	Arabidopsis thaliana	core promoter element around -30 of transcription start
BnaA02NPF5.11	TATA-box	TATA	983	4	+	Arabidopsis thaliana	core promoter element around -30 of transcription start
BnaA02NPF5.11	TATA-box	TATA	989	4	+	Arabidopsis thaliana	core promoter element around -30 of transcription start
BnaA02NPF5.11	TATA-box	TATA	1024	4	-	Arabidopsis thaliana	core promoter element around -30 of transcription start
BnaA02NPF5.11	TATA-box	TATA	1055	4	-	Arabidopsis thaliana	core promoter element around -30 of transcription start
BnaA02NPF5.11	TATA-box	TATA	1065	4	-	Arabidopsis thaliana	core promoter element around -30 of transcription start
BnaA02NPF5.11	TATA-box	TATA	1254	4	-	Arabidopsis thaliana	core promoter element around -30 of transcription start
BnaA02NPF5.11	TATA-box	TATA	1263	4	-	Arabidopsis thaliana	core promoter element around -30 of transcription start
BnaA02NPF5.11	TATA-box	TATA	1299	4	-	Arabidopsis thaliana	core promoter element around -30 of transcription start
BnaA02NPF5.11	TATA-box	TATA	1311	4	-	Arabidopsis thaliana	core promoter element around -30 of transcription start
BnaA02NPF5.11	TATA-box	TATA	1347	4	-	Arabidopsis thaliana	core promoter element around -30 of transcription start
BnaA02NPF5.11	TATA-box	TATA	1368	4	-	Arabidopsis thaliana	core promoter element around -30 of transcription start
BnaA02NPF5.11	TATA-box	TATA	1388	4	-	Arabidopsis thaliana	core promoter element around -30 of transcription start
BnaA02NPF5.11	TATA-box	TATA	1432	4	-	Arabidopsis thaliana	core promoter element around -30 of transcription start
BnaA02NPF5.11	TATA-box	TATA	1485	4	-	Arabidopsis thaliana	core promoter element around -30 of transcription start
BnaA02NPF5.11	TATA-box	TATA	1498	4	-	Arabidopsis thaliana	core promoter element around -30 of transcription start
BnaA02NPF5.11	TATA-box	TATA	1555	4	-	Arabidopsis thaliana	core promoter element around -30 of transcription start
BnaA02NPF5.11	TATA-box	TATA	1619	4	-	Arabidopsis thaliana	core promoter element around -30 of transcription start
BnaA02NPF5.11	TATA-box	TATA	1638	4	-	Arabidopsis thaliana	core promoter element around -30 of transcription start
BnaA02NPF5.11	TATA-box	TATA	1648	4	-	Arabidopsis thaliana	core promoter element around -30 of transcription start
BnaA02NPF5.11	TATA-box	TATA	1827	4	-	Arabidopsis thaliana	core promoter element around -30 of transcription start
BnaA02NPF5.11	TATA-box	TATA	1927	4	-	Arabidopsis thaliana	core promoter element around -30 of transcription start
BnaA02NPF5.11	TATA-box	TATA	1935	4	-	Arabidopsis thaliana	core promoter element around -30 of transcription start
BnaA02NPF5.11	TATA-box	TATAA	90	5	-	Arabidopsis thaliana	core promoter element around -30 of transcription start
BnaA02NPF5.11	TATA-box	TATAA	158	5	-	Arabidopsis thaliana	core promoter element around -30 of transcription start
BnaA02NPF5.11	TATA-box	TATAA	249	5	-	Arabidopsis thaliana	core promoter element around -30 of transcription start
BnaA02NPF5.11	TATA-box	TATAA	259	5	-	Arabidopsis thaliana	core promoter element around -30 of transcription start
BnaA02NPF5.11	TATA-box	TATAA	324	5	-	Arabidopsis thaliana	core promoter element around -30 of transcription start
BnaA02NPF5.11	TATA-box	TATAA	527	5	-	Arabidopsis thaliana	core promoter element around -30 of transcription start
BnaA02NPF5.11	TATA-box	TATAA	840	5	-	Arabidopsis thaliana	core promoter element around -30 of transcription start
BnaA02NPF5.11	TATA-box	TATAA	855	5	-	Arabidopsis thaliana	core promoter element around -30 of transcription start
BnaA02NPF5.11	TATA-box	TATAA	974	5	-	Arabidopsis thaliana	core promoter element around -30 of transcription start
BnaA02NPF5.11	TATA-box	TATAA	988	5	-	Arabidopsis thaliana	core promoter element around -30 of transcription start
BnaA02NPF5.11	TATA-box	TATAA	1262	5	-	Arabidopsis thaliana	core promoter element around -30 of transcription start
BnaA02NPF5.11	TATA-box	TATAA	1298	5	-	Arabidopsis thaliana	core promoter element around -30 of transcription start
BnaA02NPF5.11	TATA-box	TATAA	1310	5	-	Arabidopsis thaliana	core promoter element around -30 of transcription start
BnaA02NPF5.11	TATA-box	TATAA	1497	5	-	Arabidopsis thaliana	core promoter element around -30 of transcription start
BnaA02NPF5.11	TATA-box	TATAAA	89	6	-	Helianthus annuus	core promoter element around -30 of transcription start
BnaA02NPF5.11	TATA-box	TATAAA	157	6	-	Helianthus annuus	core promoter element around -30 of transcription start
BnaA02NPF5.11	TATA-box	TATAAA	258	6	-	Helianthus annuus	core promoter element around -30 of transcription start
BnaA02NPF5.11	TATA-box	TATAAA	839	6	-	Helianthus annuus	core promoter element around -30 of transcription start
BnaA02NPF5.11	TATA-box	TATAAA	854	6	-	Helianthus annuus	core promoter element around -30 of transcription start
BnaA02NPF5.11	TATA-box	TATAAA	973	6	-	Helianthus annuus	core promoter element around -30 of transcription start
BnaA02NPF5.11	TATA-box	TATAAA	987	6	-	Helianthus annuus	core promoter element around -30 of transcription start
BnaA02NPF5.11	TATA-box	TATAAA	1496	6	-	Helianthus annuus	core promoter element around -30 of transcription start
BnaA02NPF5.11	TATA-box	TATAAAA	156	7	-	Pisum sativum	core promoter element around -30 of transcription start
BnaA02NPF5.11	TATA-box	TATAAAA	853	7	-	Pisum sativum	core promoter element around -30 of transcription start
BnaA02NPF5.11	TATA	TATAAAAT	155	8	-	Arabidopsis thaliana
BnaA02NPF5.11	TATA-box	TATAAAT	838	7	-	Brassica juncea	core promoter element around -30 of transcription start
BnaA02NPF5.11	TATA-box	TATAAAT	972	7	-	Brassica juncea	core promoter element around -30 of transcription start
BnaA02NPF5.11	TATA-box	TATAAAT	986	7	-	Brassica juncea	core promoter element around -30 of transcription start
BnaA02NPF5.11	TATA-box	TATAAAT	1495	7	-	Brassica juncea	core promoter element around -30 of transcription start
BnaA02NPF5.11	TATA-box	TATAAATA	985	8	-	Daucus carota	core promoter element around -30 of transcription start
BnaA02NPF5.11	Unnamed__6	taTAAATATct	982	10	-	Zea mays
BnaA02NPF5.11	TATA-box	TATACA	777	6	-	Helianthus annuus	core promoter element around -30 of transcription start
BnaA02NPF5.11	TATA-box	TATACA	1483	6	-	Helianthus annuus	core promoter element around -30 of transcription start
BnaA02NPF5.11	TATA-box	TATACA	1825	6	-	Helianthus annuus	core promoter element around -30 of transcription start
BnaA02NPF5.11	AT~TATA-box	TATATA	1049	6	-	Arabidopsis thaliana
BnaA02NPF5.11	AT~TATA-box	TATATA	1051	6	-	Arabidopsis thaliana
BnaA02NPF5.11	AT~TATA-box	TATATA	1053	6	-	Arabidopsis thaliana
BnaA02NPF5.11	AT~TATA-box	TATATA	1252	6	-	Arabidopsis thaliana
BnaA02NPF5.11	AT~TATA-box	TATATA	1345	6	-	Arabidopsis thaliana
BnaA02NPF5.11	AT~TATA-box	TATATA	1933	6	-	Arabidopsis thaliana
BnaA02NPF5.11	TATA-box	TATATA	1049	6	-	Arabidopsis thaliana	core promoter element around -30 of transcription start
BnaA02NPF5.11	TATA-box	TATATA	1051	6	-	Arabidopsis thaliana	core promoter element around -30 of transcription start
BnaA02NPF5.11	TATA-box	TATATA	1053	6	-	Arabidopsis thaliana	core promoter element around -30 of transcription start
BnaA02NPF5.11	TATA-box	TATATA	1252	6	-	Arabidopsis thaliana	core promoter element around -30 of transcription start
BnaA02NPF5.11	TATA-box	TATATA	1345	6	-	Arabidopsis thaliana	core promoter element around -30 of transcription start
BnaA02NPF5.11	TATA-box	TATATA	1933	6	-	Arabidopsis thaliana	core promoter element around -30 of transcription start
BnaA02NPF5.11	TATA-box	TATATTTATATTT	850	12	+	Avena sativa	core promoter element around -30 of transcription start
BnaA02NPF5.11	TATA-box	TATTTAAA	921	8	-	Arabidopsis thaliana	core promoter element around -30 of transcription start
BnaA02NPF5.11	TATA-box	TATTTAAA	943	8	+	Arabidopsis thaliana	core promoter element around -30 of transcription start
BnaA02NPF5.11	TATA-box	TATTTAAA	1152	8	-	Arabidopsis thaliana	core promoter element around -30 of transcription start
BnaA02NPF5.11	TATA-box	TATTTAAA	1456	8	+	Arabidopsis thaliana	core promoter element around -30 of transcription start
BnaA02NPF5.11	TCT-motif	TCTTAC	574	6	-	Arabidopsis thaliana	part of a light responsive element
BnaA02NPF5.11	TCT-motif	TCTTAC	1030	6	+	Arabidopsis thaliana	part of a light responsive element
BnaA02NPF5.11	TGACG-motif	TGACG	208	5	-	Hordeum vulgare	cis-acting regulatory element involved in the MeJA-responsiveness
BnaA02NPF5.11	TGACG-motif	TGACG	545	5	+	Hordeum vulgare	cis-acting regulatory element involved in the MeJA-responsiveness
BnaA02NPF5.11	as-1	TGACG	208	5	-	Arabidopsis thaliana
BnaA02NPF5.11	as-1	TGACG	545	5	+	Arabidopsis thaliana
BnaA02NPF5.11	GCN4_motif	TGAGTCA	1838	7	-	Oryza sativa	cis-regulatory element involved in endosperm expression
BnaA02NPF5.11	Box II	TGGTAATAA	1447	9	-	Solanum tuberosum	part of a light responsive element
BnaA02NPF5.11	W box	TTGACC	1589	6	-	Arabidopsis thaliana
BnaA02NPF5.11	W box	TTGACC	1785	6	+	Arabidopsis thaliana
BnaA02NPF5.15	ARE	AAACCA	480	6	+	Zea mays	cis-acting regulatory element essential for the anaerobic induction
BnaA02NPF5.15	ARE	AAACCA	847	6	+	Zea mays	cis-acting regulatory element essential for the anaerobic induction
BnaA02NPF5.15	ARE	AAACCA	1388	6	+	Zea mays	cis-acting regulatory element essential for the anaerobic induction
BnaA02NPF5.15	WUN-motif	AAATTACT	1379	8	+	Nicotiana glutinosa
BnaA02NPF5.15	WUN-motif	AAATTACTA	1101	9	+	Nicotiana glutinosa
BnaA02NPF5.15	ABRE	ACGTG	105	5	-	Arabidopsis thaliana	cis-acting element involved in the abscisic acid responsiveness
BnaA02NPF5.15	ABRE	ACGTG	301	5	-	Arabidopsis thaliana	cis-acting element involved in the abscisic acid responsiveness
BnaA02NPF5.15	ABRE	ACGTG	630	5	-	Arabidopsis thaliana	cis-acting element involved in the abscisic acid responsiveness
BnaA02NPF5.15	ABRE	ACGTG	768	5	+	Arabidopsis thaliana	cis-acting element involved in the abscisic acid responsiveness
BnaA02NPF5.15	STRE	AGGGG	253	5	+	Arabidopsis thaliana
BnaA02NPF5.15	STRE	AGGGG	723	5	-	Arabidopsis thaliana
BnaA02NPF5.15	AT-rich element	ATAGAAATCAA	128	10	+	Glycine max	binding site of AT-rich DNA binding protein (ATBP-1)
BnaA02NPF5.15	TATA-box	ATATAA	447	6	+	Brassica oleracea	core promoter element around -30 of transcription start
BnaA02NPF5.15	TATA-box	ATATAA	828	6	+	Brassica oleracea	core promoter element around -30 of transcription start
BnaA02NPF5.15	TATA-box	ATATAA	1040	6	+	Brassica oleracea	core promoter element around -30 of transcription start
BnaA02NPF5.15	TATA-box	ATATAA	1240	6	+	Brassica oleracea	core promoter element around -30 of transcription start
BnaA02NPF5.15	TATA-box	ATATAA	1279	6	+	Brassica oleracea	core promoter element around -30 of transcription start
BnaA02NPF5.15	TATA-box	ATATAA	1685	6	+	Brassica oleracea	core promoter element around -30 of transcription start
BnaA02NPF5.15	TATA-box	ATATAA	1692	6	+	Brassica oleracea	core promoter element around -30 of transcription start
BnaA02NPF5.15	TATA-box	ATATAA	1710	6	+	Brassica oleracea	core promoter element around -30 of transcription start
BnaA02NPF5.15	TATA-box	ATATAT	826	6	+	Brassica napus	core promoter element around -30 of transcription start
BnaA02NPF5.15	TATA-box	ATATAT	926	6	+	Brassica napus	core promoter element around -30 of transcription start
BnaA02NPF5.15	TATA-box	ATATAT	1067	6	-	Brassica napus	core promoter element around -30 of transcription start
BnaA02NPF5.15	TATA-box	ATATAT	1246	6	-	Brassica napus	core promoter element around -30 of transcription start
BnaA02NPF5.15	TATA-box	ATATAT	1513	6	-	Brassica napus	core promoter element around -30 of transcription start
BnaA02NPF5.15	TATA-box	ATATAT	1515	6	-	Brassica napus	core promoter element around -30 of transcription start
BnaA02NPF5.15	TATA-box	ATATAT	1544	6	-	Brassica napus	core promoter element around -30 of transcription start
BnaA02NPF5.15	TATA-box	ATATAT	1651	6	-	Brassica napus	core promoter element around -30 of transcription start
BnaA02NPF5.15	TATA-box	ATATAT	1653	6	-	Brassica napus	core promoter element around -30 of transcription start
BnaA02NPF5.15	TATA-box	ATATAT	1690	6	-	Brassica napus	core promoter element around -30 of transcription start
BnaA02NPF5.15	TATA-box	ATATAT	1708	6	-	Brassica napus	core promoter element around -30 of transcription start
BnaA02NPF5.15	TATA-box	ATATAT	1752	6	-	Brassica napus	core promoter element around -30 of transcription start
BnaA02NPF5.15	Box 4	ATTAAT	156	6	+	Petroselinum crispum	part of a conserved DNA module involved in light responsiveness
BnaA02NPF5.15	Box 4	ATTAAT	866	6	+	Petroselinum crispum	part of a conserved DNA module involved in light responsiveness
BnaA02NPF5.15	Box 4	ATTAAT	936	6	+	Petroselinum crispum	part of a conserved DNA module involved in light responsiveness
BnaA02NPF5.15	Box 4	ATTAAT	1393	6	-	Petroselinum crispum	part of a conserved DNA module involved in light responsiveness
BnaA02NPF5.15	Box 4	ATTAAT	1494	6	-	Petroselinum crispum	part of a conserved DNA module involved in light responsiveness
BnaA02NPF5.15	TATA-box	ATTATA	295	6	+	Brassica napus	core promoter element around -30 of transcription start
BnaA02NPF5.15	TATA-box	ATTATA	980	6	+	Brassica napus	core promoter element around -30 of transcription start
BnaA02NPF5.15	TATA-box	ATTATA	986	6	+	Brassica napus	core promoter element around -30 of transcription start
BnaA02NPF5.15	TATA-box	ATTATA	1071	6	+	Brassica napus	core promoter element around -30 of transcription start
BnaA02NPF5.15	TATA-box	ATTATA	1374	6	+	Brassica napus	core promoter element around -30 of transcription start
BnaA02NPF5.15	TATA-box	ATTATA	1541	6	+	Brassica napus	core promoter element around -30 of transcription start
BnaA02NPF5.15	ERE	ATTTCATA	1165	8	-	Nicotiana glutinos
BnaA02NPF5.15	ERE	ATTTCATA	1664	8	+	Nicotiana glutinos
BnaA02NPF5.15	ERE	ATTTTAAA	468	8	+	Nicotiana glutinos
BnaA02NPF5.15	ERE	ATTTTAAA	1257	8	+	Nicotiana glutinos
BnaA02NPF5.15	ERE	ATTTTAAA	1366	8	-	Nicotiana glutinos
BnaA02NPF5.15	CAAT-box	CAAAT	122	5	-	Pisum sativum	common cis-acting element in promoter and enhancer regions
BnaA02NPF5.15	CAAT-box	CAAAT	136	5	+	Pisum sativum	common cis-acting element in promoter and enhancer regions
BnaA02NPF5.15	CAAT-box	CAAAT	458	5	-	Pisum sativum	common cis-acting element in promoter and enhancer regions
BnaA02NPF5.15	CAAT-box	CAAAT	524	5	-	Pisum sativum	common cis-acting element in promoter and enhancer regions
BnaA02NPF5.15	CAAT-box	CAAAT	735	5	-	Pisum sativum	common cis-acting element in promoter and enhancer regions
BnaA02NPF5.15	CAAT-box	CAAAT	959	5	-	Pisum sativum	common cis-acting element in promoter and enhancer regions
BnaA02NPF5.15	CAAT-box	CAAAT	1132	5	+	Pisum sativum	common cis-acting element in promoter and enhancer regions
BnaA02NPF5.15	CAAT-box	CAAAT	1177	5	+	Pisum sativum	common cis-acting element in promoter and enhancer regions
BnaA02NPF5.15	CAAT-box	CAAAT	1338	5	-	Pisum sativum	common cis-acting element in promoter and enhancer regions
BnaA02NPF5.15	CAAT-box	CAAAT	1452	5	+	Pisum sativum	common cis-acting element in promoter and enhancer regions
BnaA02NPF5.15	CAAT-box	CAAAT	1555	5	+	Pisum sativum	common cis-acting element in promoter and enhancer regions
BnaA02NPF5.15	Myb	CAACTG	390	6	-	Arabidopsis thaliana
BnaA02NPF5.15	MBS	CAACTG	390	6	-	Arabidopsis thaliana	MYB binding site involved in drought-inducibility
BnaA02NPF5.15	CAAT-box	CAAT	42	4	+	Nicotiana glutinosa
BnaA02NPF5.15	CAAT-box	CAAT	70	4	+	Nicotiana glutinosa
BnaA02NPF5.15	CAAT-box	CAAT	151	4	+	Nicotiana glutinosa
BnaA02NPF5.15	CAAT-box	CAAT	325	4	+	Nicotiana glutinosa
BnaA02NPF5.15	CAAT-box	CAAT	345	4	-	Nicotiana glutinosa
BnaA02NPF5.15	CAAT-box	CAAT	487	4	+	Nicotiana glutinosa
BnaA02NPF5.15	CAAT-box	CAAT	489	4	-	Nicotiana glutinosa
BnaA02NPF5.15	CAAT-box	CAAT	522	4	+	Nicotiana glutinosa
BnaA02NPF5.15	CAAT-box	CAAT	543	4	+	Nicotiana glutinosa
BnaA02NPF5.15	CAAT-box	CAAT	581	4	+	Nicotiana glutinosa
BnaA02NPF5.15	CAAT-box	CAAT	717	4	+	Nicotiana glutinosa
BnaA02NPF5.15	CAAT-box	CAAT	746	4	-	Nicotiana glutinosa
BnaA02NPF5.15	CAAT-box	CAAT	853	4	+	Nicotiana glutinosa
BnaA02NPF5.15	CAAT-box	CAAT	905	4	-	Nicotiana glutinosa
BnaA02NPF5.15	CAAT-box	CAAT	934	4	+	Nicotiana glutinosa
BnaA02NPF5.15	CAAT-box	CAAT	1026	4	+	Nicotiana glutinosa
BnaA02NPF5.15	CAAT-box	CAAT	1350	4	-	Nicotiana glutinosa
BnaA02NPF5.15	CAAT-box	CAAT	1403	4	+	Nicotiana glutinosa
BnaA02NPF5.15	CAAT-box	CAAT	1606	4	+	Nicotiana glutinosa
BnaA02NPF5.15	CAAT-box	CAAT	1879	4	-	Nicotiana glutinosa
BnaA02NPF5.15	MYC	CAATTG	487	6	+	Arabidopsis thaliana
BnaA02NPF5.15	ABRE4	CACGTA	767	6	-	Zea mays
BnaA02NPF5.15	G-box	CACGTC	630	6	+	Zea mays	cis-acting regulatory element involved in light responsiveness
BnaA02NPF5.15	G-Box	CACGTT	105	6	+	Pisum sativum	cis-acting regulatory element involved in light responsiveness
BnaA02NPF5.15	G-Box	CACGTT	301	6	+	Pisum sativum	cis-acting regulatory element involved in light responsiveness
BnaA02NPF5.15	MYC	CATGTG	381	6	-	Arabidopsis thaliana
BnaA02NPF5.15	MYC	CATTTG	136	6	-	Arabidopsis thaliana
BnaA02NPF5.15	MYC	CATTTG	1452	6	-	Arabidopsis thaliana
BnaA02NPF5.15	CAAT-box	CCAAT	486	5	+	Arabidopsis thaliana	common cis-acting element in promoter and enhancer regions
BnaA02NPF5.15	CAAT-box	CCAAT	672	5	-	Arabidopsis thaliana	common cis-acting element in promoter and enhancer regions
BnaA02NPF5.15	CAAT-box	CCAAT	701	5	-	Arabidopsis thaliana	common cis-acting element in promoter and enhancer regions
BnaA02NPF5.15	CAAT-box	CCAAT	1605	5	+	Arabidopsis thaliana	common cis-acting element in promoter and enhancer regions
BnaA02NPF5.15	TCA-element	CCATCTTTTT	657	9	-	Nicotiana tabacum	cis-acting element involved in salicylic acid responsiveness
BnaA02NPF5.15	TATA-box	ccTATAAAaa	757	9	-	Arabidopsis thaliana	core promoter element around -30 of transcription start
BnaA02NPF5.15	CGTCA-motif	CGTCA	610	5	+	Hordeum vulgare	cis-acting regulatory element involved in the MeJA-responsiveness
BnaA02NPF5.15	CGTCA-motif	CGTCA	1885	5	-	Hordeum vulgare	cis-acting regulatory element involved in the MeJA-responsiveness
BnaA02NPF5.15	CGTCA-motif	CGTCA	1890	5	+	Hordeum vulgare	cis-acting regulatory element involved in the MeJA-responsiveness
BnaA02NPF5.15	Unnamed__1	CGTGG	629	5	-	Zea mays
BnaA02NPF5.15	Unnamed__4	CTCC	94	4	-	Petroselinum hortense
BnaA02NPF5.15	Unnamed__4	CTCC	665	4	-	Petroselinum hortense
BnaA02NPF5.15	AAGAA-motif	GAAAGAA	116	7	+	Avena sativa
BnaA02NPF5.15	Unnamed__1	GAATTTAATTAA	416	11	-	Glycine max	60K protein binding site
BnaA02NPF5.15	ABRE	GCAACGTGTC	765	9	+	Hordeum vulgare	cis-acting element involved in the abscisic acid responsiveness
BnaA02NPF5.15	CAT-box	GCCACT	403	6	-	Arabidopsis thaliana	cis-acting regulatory element related to meristem expression
BnaA02NPF5.15	GT1-motif	GGTTAA	1742	6	-	Arabidopsis thaliana	light responsive element
BnaA02NPF5.15	AT-rich sequence	TAAAATACT	368	9	-	Pisum sativum	element for maximal elicitor-mediated activation (2copies)
BnaA02NPF5.15	TATA-box	TAAAGATT	954	8	+	Arabidopsis thaliana	core promoter element around -30 of transcription start
BnaA02NPF5.15	TATA-box	TAAAGATT	1868	8	+	Arabidopsis thaliana	core promoter element around -30 of transcription start
BnaA02NPF5.15	G-box	TAACACGTAG	766	9	-	Brassica oleracea	cis-acting regulatory element involved in light responsiveness
BnaA02NPF5.15	MYB	TAACCA	125	6	-	Arabidopsis thaliana
BnaA02NPF5.15	MYB	TAACCA	1035	6	+	Arabidopsis thaliana
BnaA02NPF5.15	MYB-like sequence	TAACCA	125	6	-	Arabidopsis thaliana
BnaA02NPF5.15	MYB-like sequence	TAACCA	1035	6	+	Arabidopsis thaliana
BnaA02NPF5.15	Myb	TAACTG	1964	6	-	Arabidopsis thaliana
BnaA02NPF5.15	TATA-box	TACATAAA	1287	8	+	Oryza sativa	core promoter element around -30 of transcription start
BnaA02NPF5.15	ABRE3a	TACGTG	767	6	+	Zea mays
BnaA02NPF5.15	G-box	TACGTG	767	6	+	Arabidopsis thaliana	cis-acting regulatory element involved in light responsiveness
BnaA02NPF5.15	ABRE	TACGTGTC	767	8	+	Oryza sativa	cis-acting element involved in the abscisic acid responsiveness
BnaA02NPF5.15	AT~ABRE	TACGTGTC	767	8	+	Arabidopsis thaliana
BnaA02NPF5.15	TATA-box	TATA	297	4	+	Arabidopsis thaliana	core promoter element around -30 of transcription start
BnaA02NPF5.15	TATA-box	TATA	377	4	+	Arabidopsis thaliana	core promoter element around -30 of transcription start
BnaA02NPF5.15	TATA-box	TATA	433	4	+	Arabidopsis thaliana	core promoter element around -30 of transcription start
BnaA02NPF5.15	TATA-box	TATA	448	4	+	Arabidopsis thaliana	core promoter element around -30 of transcription start
BnaA02NPF5.15	TATA-box	TATA	761	4	+	Arabidopsis thaliana	core promoter element around -30 of transcription start
BnaA02NPF5.15	TATA-box	TATA	801	4	+	Arabidopsis thaliana	core promoter element around -30 of transcription start
BnaA02NPF5.15	TATA-box	TATA	829	4	+	Arabidopsis thaliana	core promoter element around -30 of transcription start
BnaA02NPF5.15	TATA-box	TATA	927	4	+	Arabidopsis thaliana	core promoter element around -30 of transcription start
BnaA02NPF5.15	TATA-box	TATA	988	4	+	Arabidopsis thaliana	core promoter element around -30 of transcription start
BnaA02NPF5.15	TATA-box	TATA	1041	4	-	Arabidopsis thaliana	core promoter element around -30 of transcription start
BnaA02NPF5.15	TATA-box	TATA	1068	4	-	Arabidopsis thaliana	core promoter element around -30 of transcription start
BnaA02NPF5.15	TATA-box	TATA	1073	4	-	Arabidopsis thaliana	core promoter element around -30 of transcription start
BnaA02NPF5.15	TATA-box	TATA	1098	4	-	Arabidopsis thaliana	core promoter element around -30 of transcription start
BnaA02NPF5.15	TATA-box	TATA	1196	4	-	Arabidopsis thaliana	core promoter element around -30 of transcription start
BnaA02NPF5.15	TATA-box	TATA	1241	4	-	Arabidopsis thaliana	core promoter element around -30 of transcription start
BnaA02NPF5.15	TATA-box	TATA	1247	4	-	Arabidopsis thaliana	core promoter element around -30 of transcription start
BnaA02NPF5.15	TATA-box	TATA	1271	4	-	Arabidopsis thaliana	core promoter element around -30 of transcription start
BnaA02NPF5.15	TATA-box	TATA	1280	4	-	Arabidopsis thaliana	core promoter element around -30 of transcription start
BnaA02NPF5.15	TATA-box	TATA	1376	4	-	Arabidopsis thaliana	core promoter element around -30 of transcription start
BnaA02NPF5.15	TATA-box	TATA	1441	4	-	Arabidopsis thaliana	core promoter element around -30 of transcription start
BnaA02NPF5.15	TATA-box	TATA	1489	4	-	Arabidopsis thaliana	core promoter element around -30 of transcription start
BnaA02NPF5.15	TATA-box	TATA	1507	4	-	Arabidopsis thaliana	core promoter element around -30 of transcription start
BnaA02NPF5.15	TATA-box	TATA	1516	4	-	Arabidopsis thaliana	core promoter element around -30 of transcription start
BnaA02NPF5.15	TATA-box	TATA	1545	4	-	Arabidopsis thaliana	core promoter element around -30 of transcription start
BnaA02NPF5.15	TATA-box	TATA	1580	4	-	Arabidopsis thaliana	core promoter element around -30 of transcription start
BnaA02NPF5.15	TATA-box	TATA	1593	4	-	Arabidopsis thaliana	core promoter element around -30 of transcription start
BnaA02NPF5.15	TATA-box	TATA	1654	4	-	Arabidopsis thaliana	core promoter element around -30 of transcription start
BnaA02NPF5.15	TATA-box	TATA	1678	4	-	Arabidopsis thaliana	core promoter element around -30 of transcription start
BnaA02NPF5.15	TATA-box	TATA	1686	4	-	Arabidopsis thaliana	core promoter element around -30 of transcription start
BnaA02NPF5.15	TATA-box	TATA	1693	4	-	Arabidopsis thaliana	core promoter element around -30 of transcription start
BnaA02NPF5.15	TATA-box	TATA	1711	4	-	Arabidopsis thaliana	core promoter element around -30 of transcription start
BnaA02NPF5.15	TATA-box	TATA	1753	4	-	Arabidopsis thaliana	core promoter element around -30 of transcription start
BnaA02NPF5.15	TATA-box	TATA	1908	4	-	Arabidopsis thaliana	core promoter element around -30 of transcription start
BnaA02NPF5.15	TATA-box	TATAA	296	5	-	Arabidopsis thaliana	core promoter element around -30 of transcription start
BnaA02NPF5.15	TATA-box	TATAA	760	5	-	Arabidopsis thaliana	core promoter element around -30 of transcription start
BnaA02NPF5.15	TATA-box	TATAA	800	5	-	Arabidopsis thaliana	core promoter element around -30 of transcription start
BnaA02NPF5.15	TATA-box	TATAA	981	5	-	Arabidopsis thaliana	core promoter element around -30 of transcription start
BnaA02NPF5.15	TATA-box	TATAA	987	5	-	Arabidopsis thaliana	core promoter element around -30 of transcription start
BnaA02NPF5.15	TATA-box	TATAA	1072	5	-	Arabidopsis thaliana	core promoter element around -30 of transcription start
BnaA02NPF5.15	TATA-box	TATAA	1375	5	-	Arabidopsis thaliana	core promoter element around -30 of transcription start
BnaA02NPF5.15	TATA-box	TATAA	1579	5	-	Arabidopsis thaliana	core promoter element around -30 of transcription start
BnaA02NPF5.15	TATA-box	TATAA	1592	5	-	Arabidopsis thaliana	core promoter element around -30 of transcription start
BnaA02NPF5.15	TATA-box	TATAA	1677	5	-	Arabidopsis thaliana	core promoter element around -30 of transcription start
BnaA02NPF5.15	TATA-box	TATAAA	373	6	-	Helianthus annuus	core promoter element around -30 of transcription start
BnaA02NPF5.15	TATA-box	TATAAA	759	6	-	Helianthus annuus	core promoter element around -30 of transcription start
BnaA02NPF5.15	TATA-box	TATAAA	1064	6	-	Helianthus annuus	core promoter element around -30 of transcription start
BnaA02NPF5.15	TATA-box	TATAAA	1578	6	-	Helianthus annuus	core promoter element around -30 of transcription start
BnaA02NPF5.15	TATA-box	TATAAA	1591	6	-	Helianthus annuus	core promoter element around -30 of transcription start
BnaA02NPF5.15	TATA-box	TATAAA	1705	6	-	Helianthus annuus	core promoter element around -30 of transcription start
BnaA02NPF5.15	TATA-box	TATAAAA	372	7	-	Pisum sativum	core promoter element around -30 of transcription start
BnaA02NPF5.15	TATA-box	TATAAAA	758	7	-	Pisum sativum	core promoter element around -30 of transcription start
BnaA02NPF5.15	TATA-box	TATAAAA	1704	7	-	Pisum sativum	core promoter element around -30 of transcription start
BnaA02NPF5.15	TATA	TATAAAAT	371	8	-	Arabidopsis thaliana
BnaA02NPF5.15	TATA	TATAAAAT	1280	8	+	Arabidopsis thaliana
BnaA02NPF5.15	TATA	TATAAAAT	1580	8	+	Arabidopsis thaliana
BnaA02NPF5.15	TATA	TATAAAAT	1693	8	+	Arabidopsis thaliana
BnaA02NPF5.15	TATA-box	TATAAAT	1063	7	-	Brassica juncea	core promoter element around -30 of transcription start
BnaA02NPF5.15	TATA-box	TATAAAT	1577	7	-	Brassica juncea	core promoter element around -30 of transcription start
BnaA02NPF5.15	TATA-box	TATAAAT	1590	7	-	Brassica juncea	core promoter element around -30 of transcription start
BnaA02NPF5.15	TATA-box	TATAAATA	1589	8	-	Daucus carota	core promoter element around -30 of transcription start
BnaA02NPF5.15	Unnamed__6	taTAAATATct	1241	10	+	Zea mays
BnaA02NPF5.15	Unnamed__6	taTAAATATct	1289	10	+	Zea mays
BnaA02NPF5.15	AT~TATA-box	TATATA	375	6	+	Arabidopsis thaliana
BnaA02NPF5.15	AT~TATA-box	TATATA	827	6	+	Arabidopsis thaliana
BnaA02NPF5.15	AT~TATA-box	TATATA	925	6	+	Arabidopsis thaliana
BnaA02NPF5.15	AT~TATA-box	TATATA	1066	6	-	Arabidopsis thaliana
BnaA02NPF5.15	AT~TATA-box	TATATA	1239	6	-	Arabidopsis thaliana
BnaA02NPF5.15	AT~TATA-box	TATATA	1512	6	-	Arabidopsis thaliana
BnaA02NPF5.15	AT~TATA-box	TATATA	1514	6	-	Arabidopsis thaliana
BnaA02NPF5.15	AT~TATA-box	TATATA	1543	6	-	Arabidopsis thaliana
BnaA02NPF5.15	AT~TATA-box	TATATA	1652	6	-	Arabidopsis thaliana
BnaA02NPF5.15	AT~TATA-box	TATATA	1691	6	-	Arabidopsis thaliana
BnaA02NPF5.15	AT~TATA-box	TATATA	1707	6	-	Arabidopsis thaliana
BnaA02NPF5.15	AT~TATA-box	TATATA	1709	6	-	Arabidopsis thaliana
BnaA02NPF5.15	AT~TATA-box	TATATA	1751	6	-	Arabidopsis thaliana
BnaA02NPF5.15	AT~TATA-box	TATATA	1906	6	-	Arabidopsis thaliana
BnaA02NPF5.15	TATA-box	TATATA	375	6	+	Arabidopsis thaliana	core promoter element around -30 of transcription start
BnaA02NPF5.15	TATA-box	TATATA	827	6	+	Arabidopsis thaliana	core promoter element around -30 of transcription start
BnaA02NPF5.15	TATA-box	TATATA	925	6	+	Arabidopsis thaliana	core promoter element around -30 of transcription start
BnaA02NPF5.15	TATA-box	TATATA	1066	6	-	Arabidopsis thaliana	core promoter element around -30 of transcription start
BnaA02NPF5.15	TATA-box	TATATA	1239	6	-	Arabidopsis thaliana	core promoter element around -30 of transcription start
BnaA02NPF5.15	TATA-box	TATATA	1512	6	-	Arabidopsis thaliana	core promoter element around -30 of transcription start
BnaA02NPF5.15	TATA-box	TATATA	1514	6	-	Arabidopsis thaliana	core promoter element around -30 of transcription start
BnaA02NPF5.15	TATA-box	TATATA	1543	6	-	Arabidopsis thaliana	core promoter element around -30 of transcription start
BnaA02NPF5.15	TATA-box	TATATA	1652	6	-	Arabidopsis thaliana	core promoter element around -30 of transcription start
BnaA02NPF5.15	TATA-box	TATATA	1691	6	-	Arabidopsis thaliana	core promoter element around -30 of transcription start
BnaA02NPF5.15	TATA-box	TATATA	1707	6	-	Arabidopsis thaliana	core promoter element around -30 of transcription start
BnaA02NPF5.15	TATA-box	TATATA	1709	6	-	Arabidopsis thaliana	core promoter element around -30 of transcription start
BnaA02NPF5.15	TATA-box	TATATA	1751	6	-	Arabidopsis thaliana	core promoter element around -30 of transcription start
BnaA02NPF5.15	TATA-box	TATATA	1906	6	-	Arabidopsis thaliana	core promoter element around -30 of transcription start
BnaA02NPF5.15	TATA-box	TATATAA	374	7	-	Arabidopsis thaliana	core promoter element around -30 of transcription start
BnaA02NPF5.15	TATA-box	TATATAA	1065	7	-	Arabidopsis thaliana	core promoter element around -30 of transcription start
BnaA02NPF5.15	TATA-box	TATATAA	1542	7	-	Arabidopsis thaliana	core promoter element around -30 of transcription start
BnaA02NPF5.15	TATA-box	TATATAA	1706	7	-	Arabidopsis thaliana	core promoter element around -30 of transcription start
BnaA02NPF5.15	AT~TATA-box	TATATAAA	373	8	-	Arabidopsis thaliana
BnaA02NPF5.15	AT~TATA-box	TATATAAA	1064	8	-	Arabidopsis thaliana
BnaA02NPF5.15	AT~TATA-box	TATATAAA	1705	8	-	Arabidopsis thaliana
BnaA02NPF5.15	TATA-box	taTATAAAtc	1062	9	-	Arabidopsis thaliana	core promoter element around -30 of transcription start
BnaA02NPF5.15	TATA-box	taTATAAAtc	1576	9	-	Arabidopsis thaliana	core promoter element around -30 of transcription start
BnaA02NPF5.15	TATA-box	TATATTTATATTT	982	12	+	Avena sativa	core promoter element around -30 of transcription start
BnaA02NPF5.15	TATA-box	TATATTTATATTT	1238	12	-	Avena sativa	core promoter element around -30 of transcription start
BnaA02NPF5.15	TCA	TCATCTTCAT	1892	9	+	Pisum sativum
BnaA02NPF5.15	TATA-box	tcTATAAATAgg	84	11	+	Nicotiana tabacum	core promoter element around -30 of transcription start
BnaA02NPF5.15	TGACG-motif	TGACG	610	5	-	Hordeum vulgare	cis-acting regulatory element involved in the MeJA-responsiveness
BnaA02NPF5.15	TGACG-motif	TGACG	1885	5	+	Hordeum vulgare	cis-acting regulatory element involved in the MeJA-responsiveness
BnaA02NPF5.15	TGACG-motif	TGACG	1890	5	-	Hordeum vulgare	cis-acting regulatory element involved in the MeJA-responsiveness
BnaA02NPF5.15	as-1	TGACG	610	5	-	Arabidopsis thaliana
BnaA02NPF5.15	as-1	TGACG	1885	5	+	Arabidopsis thaliana
BnaA02NPF5.15	as-1	TGACG	1890	5	-	Arabidopsis thaliana
BnaA02NPF5.15	chs-CMA1a	TTACTTAA	1382	8	+	Daucus carota	part of a light responsive element
BnaA02NPF5.32	ARE	AAACCA	257	6	+	Zea mays	cis-acting regulatory element essential for the anaerobic induction
BnaA02NPF5.32	ARE	AAACCA	875	6	+	Zea mays	cis-acting regulatory element essential for the anaerobic induction
BnaA02NPF5.32	ARE	AAACCA	881	6	+	Zea mays	cis-acting regulatory element essential for the anaerobic induction
BnaA02NPF5.32	MRE	AACCTAA	1130	7	+	Petroselinum crispum	MYB binding site involved in light responsiveness
BnaA02NPF5.32	TGA-element	AACGAC	1610	6	+	Brassica oleracea	auxin-responsive element
BnaA02NPF5.32	GATA-motif	AAGGATAAGG	488	9	-	Solanum tuberosum	part of a light responsive element
BnaA02NPF5.32	GATA-motif	AAGGATAAGG	889	9	+	Solanum tuberosum	part of a light responsive element
BnaA02NPF5.32	ABRE	ACGTG	1591	5	+	Arabidopsis thaliana	cis-acting element involved in the abscisic acid responsiveness
BnaA02NPF5.32	STRE	AGGGG	140	5	-	Arabidopsis thaliana
BnaA02NPF5.32	STRE	AGGGG	622	5	+	Arabidopsis thaliana
BnaA02NPF5.32	TATA-box	ATATAA	1372	6	+	Brassica oleracea	core promoter element around -30 of transcription start
BnaA02NPF5.32	TATA-box	ATATAA	1745	6	+	Brassica oleracea	core promoter element around -30 of transcription start
BnaA02NPF5.32	TATA-box	ATATAT	134	6	+	Brassica napus	core promoter element around -30 of transcription start
[truncated: 23,197 more rows]
